# Supplementary material
Source: PubMed Central journal article supplement (PMC3373785)
Supplement: NIHMS377939-supplement-SI2.pdf [file NIHMS377939-supplement-SI2.pdf]

# Highly Enantioselective Direct Alkylation of Arylacetic Acids with Chiral Lithium Amides as Traceless Auxiliaries

Craig E. Stivala and Armen Zakarian

Department of Chemistry and Biochemistry, University of California, Santa Barbara, California 93106, United States

## SUPPORTING INFORMATION 2

COPIES OF  $^1\text{H}$ ,  $^{13}\text{C}$  NMR SPECTRA, HPLC TRACES

ces-7-236-a  
 File: nmr500/Zakarian/stivala/ces-7-236-a.fid  
 Pulse Sequence: s2pul  
 Solvent: CDCl3  
 Ambient temperature  
 Operator: stivala  
 File: ces-7-236-a  
 INOVA-500 "nmrserver"  
 Relax. delay 8.000 sec  
 Pulse 74.9 degrees  
 Acq. time 2.500 sec  
 Width 8503.4 Hz  
 8 repetitions  
 OBSERVE H1, 499.8560749 MHz  
 DATA PROCESSING  
 Line Broadening 0.2 Hz  
 FT size 32768  
 Total time 1 min, 24 sec

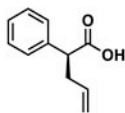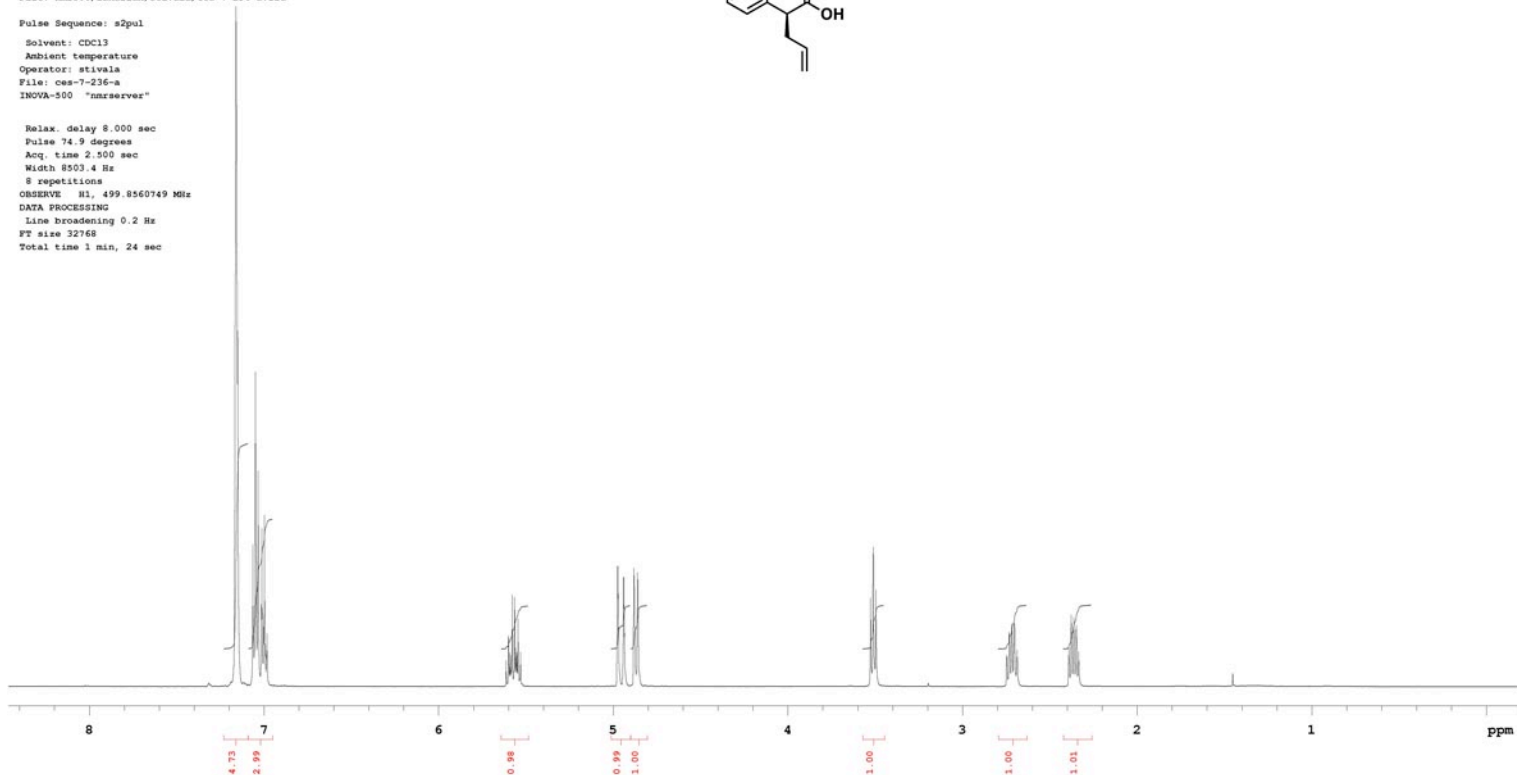

ces-7-236-a-c13  
 File: nmr500/Zakarian/stivala/ces-7-236-a-c13.fid  
 Pulse Sequence: s2pul  
 Solvent: CDCl3  
 Ambient temperature  
 Operator: stivala  
 File: ces-7-236-a-c13  
 INOVA-500 "nmrserver"  
 Relax. delay 0.200 sec  
 Pulse 90.0 degrees  
 Acq. time 1.300 sec  
 Width 32000.0 Hz  
 1071 repetitions  
 OBSERVE C13, 125.6888264 MHz  
 DECOUPLE H1, 499.8560749 MHz  
 Power 36 dB  
 on during acquisition  
 off during delay  
 WALTZ-16 modulated  
 DATA PROCESSING  
 Line Broadening 0.5 Hz  
 FT size 131072  
 Total time 41 hr, 55 min, 38 sec

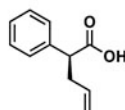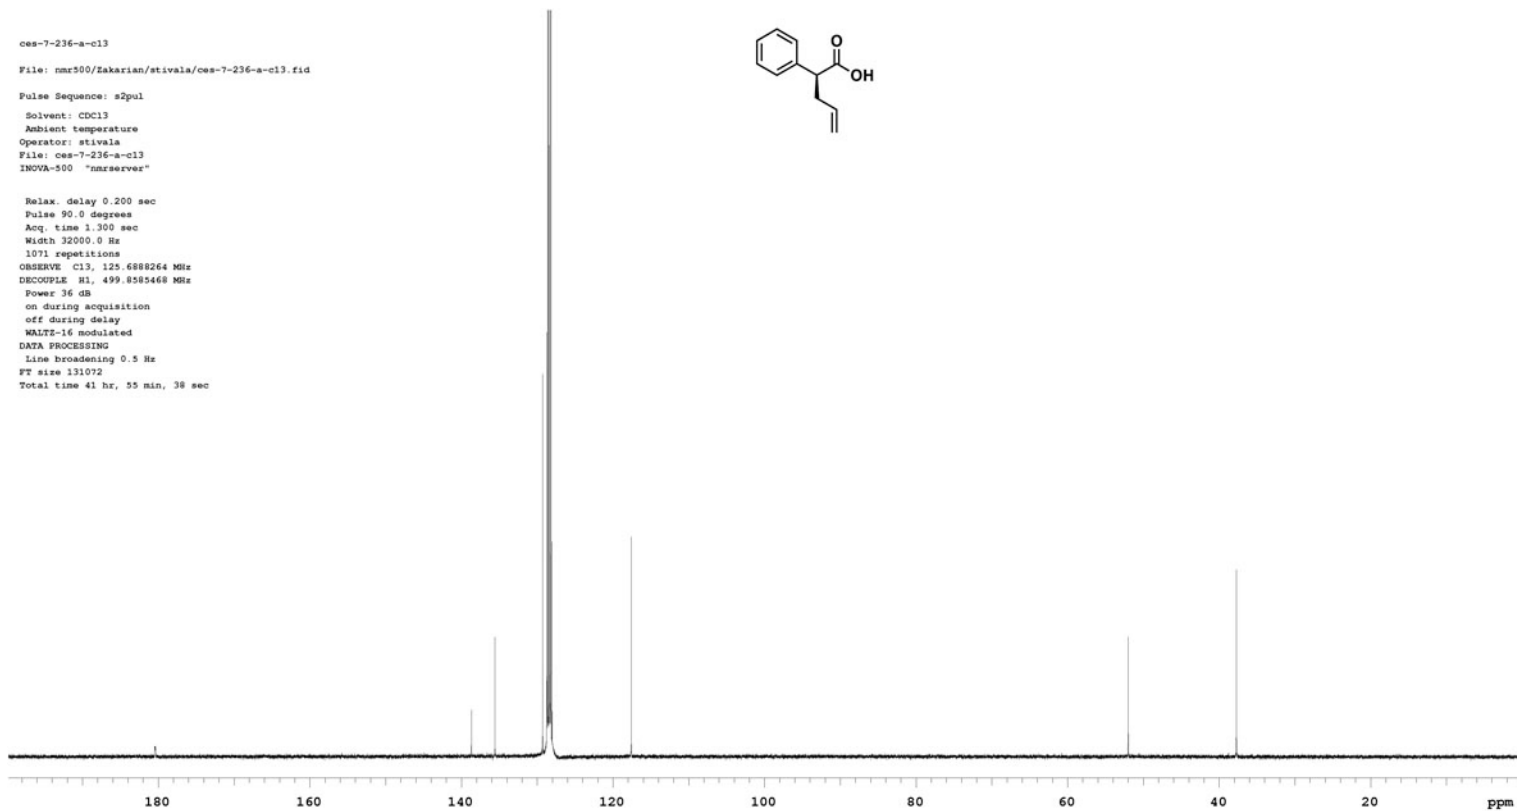

5/27/2011 09:36:34 1 / 1

## ==== Shimadzu LCsolution Analysis Report ====

C:\LabSolutions\Data\Project1\ces-7-236.lcd

Acquired by : Admin  
 Sample Name : ces-7-236  
 Sample ID : ces-7-236  
 Vial # :  
 Injection Volume : 20 uL  
 Data File Name : ces-7-236.lcd  
 Method File Name : ces-OD-H-analytical.lcm  
 Batch File Name :  
 Report File Name : Default.lcr  
 Data Acquired : 2/4/2011 2:38:38 PM  
 Data Processed : 2/4/2011 5:18:47 PM

### <Chromatogram>

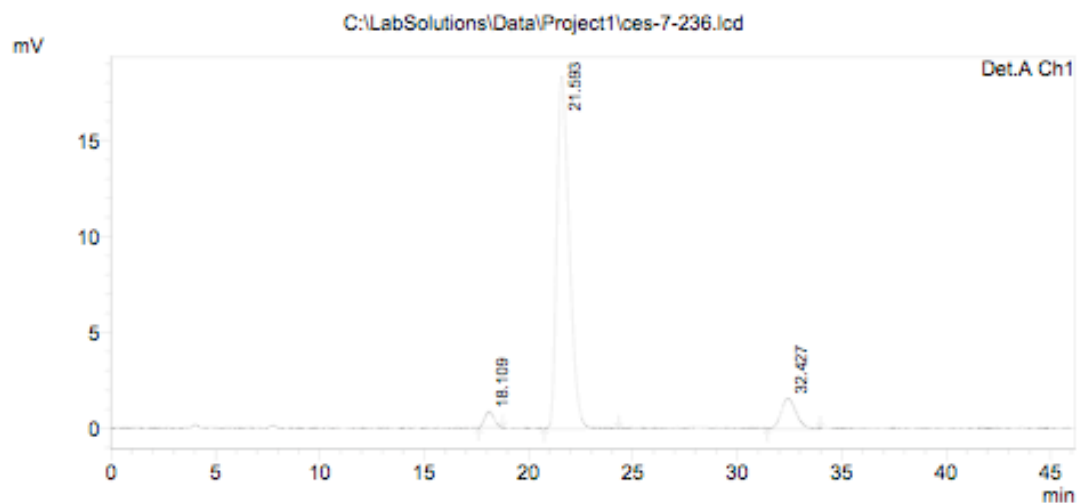

1 Det.A Ch1/215nm

PeakTable

Detector A Ch1 215nm

| Peak# | Ret. Time | Area   | Height | Area %  | Height % |
|-------|-----------|--------|--------|---------|----------|
| 1     | 18.109    | 26947  | 851    | 3.114   | 4.094    |
| 2     | 21.593    | 760487 | 18346  | 87.873  | 88.293   |
| 3     | 32.427    | 78007  | 1582   | 9.014   | 7.612    |
| Total |           | 865441 | 20779  | 100.000 | 100.000  |

C:\LabSolutions\Data\Project1\ces-7-236.lcd

5/27/2011 17:21:01 1 / 1

## ==== Shimadzu LCsolution Analysis Report ====

C:\LabSolutions\Data\Project1\ces-7-69-02.lcd

Acquired by : Admin  
 Sample Name : ces-7-69  
 Sample ID : ces-7-69  
 Vial # :  
 Injection Volume : 25 uL  
 Data File Name : ces-7-69-02.lcd  
 Method File Name : ces-OD-H-analytical 0.46cm x 25cm.lcm  
 Batch File Name :  
 Report File Name : Default.lcr  
 Data Acquired : 5/27/2011 4:52:39 PM  
 Data Processed : 5/27/2011 5:20:27 PM

### <Chromatogram>

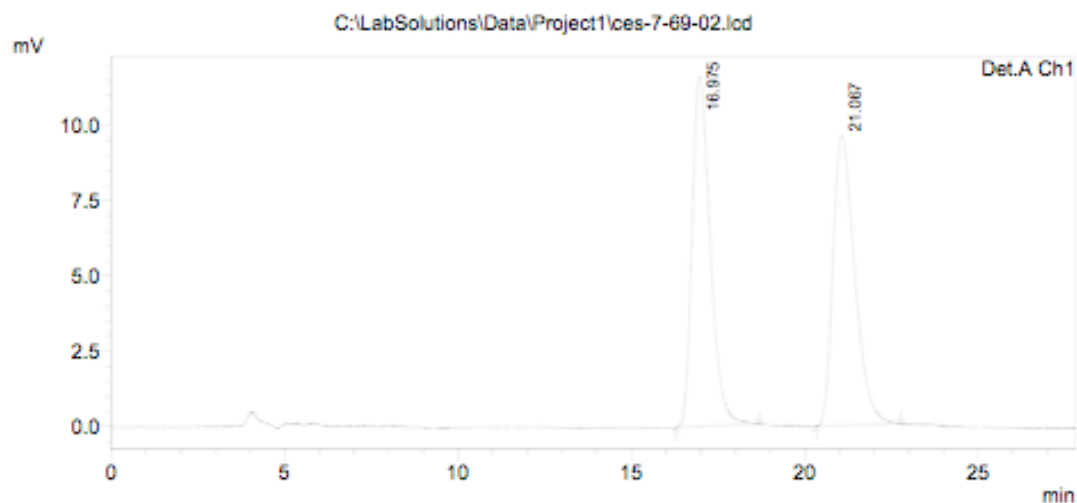

1 Det.A Ch1/215nm

PeakTable

Detector A Ch1 215nm

| Peak# | Ret. Time | Area   | Height | Area %  | Height % |
|-------|-----------|--------|--------|---------|----------|
| 1     | 16.975    | 422650 | 11602  | 50.230  | 54.707   |
| 2     | 21.067    | 418773 | 9606   | 49.770  | 45.293   |
| Total |           | 841423 | 21208  | 100.000 | 100.000  |

C:\LabSolutions\Data\Project1\ces-7-69-02.lcd



ces-7-227-a  
 File: nmr400/Zakarian/stivala/ces-7-227-a.fid  
 Pulse Sequence: s2pul  
 Solvent: cdcl3  
 Ambient temperature  
 Operator: stivala  
 File: ces-7-227-a  
 INOVA-500 "nmrserver"

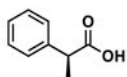

Relax. delay 8.000 sec  
 Pulse 75.0 degrees  
 Acq. time 2.500 sec  
 Width 8002.4 Hz  
 8 repetitions  
 OBSERVE H1, 399.9486915 MHz  
 DATA PROCESSING  
 Line broadening 0.2 Hz  
 FT size 65536  
 Total time 1 min, 26 sec

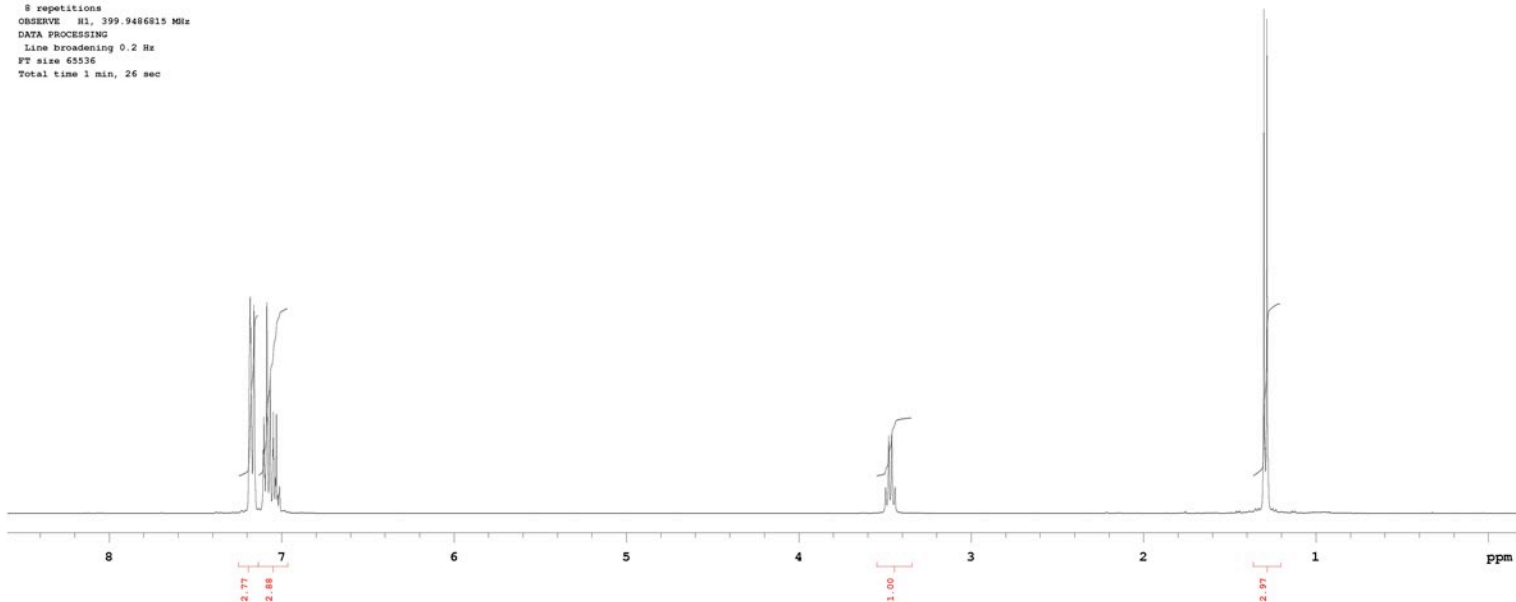

ces-7-227-c13  
 File: nmr400/Zakarian/stivala/ces-7-227-a-c13.fid  
 Pulse Sequence: s2pul  
 Solvent: cdcl3  
 Ambient temperature  
 Operator: stivala  
 File: ces-7-227-a-c13  
 INOVA-500 "nmrserver"

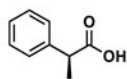

Relax. delay 0.900 sec  
 Pulse 33.8 degrees  
 Acq. time 1.000 sec  
 Width 28040.7 Hz  
 424 repetitions  
 OBSERVE C13, 100.5671107 MHz  
 DECOUPLE H1, 399.9566784 MHz  
 Power 40 dB  
 continuously on  
 WALTZ-16 modulated  
 DATA PROCESSING  
 Line broadening 1.0 Hz  
 FT size 65536  
 Total time 6 hr, 47 min, 22 sec

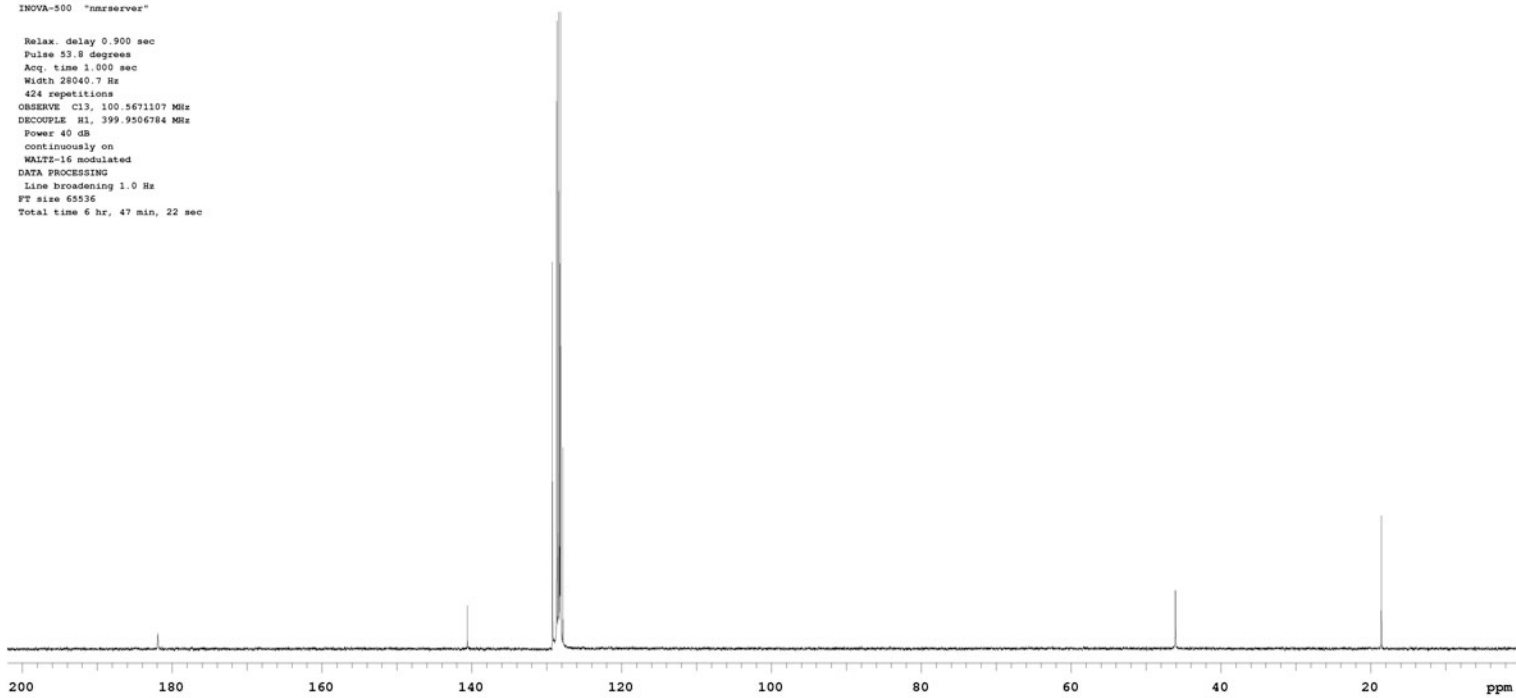

5/27/2011 09:37:58 1 / 1

## ==== Shimadzu LCsolution Analysis Report ====

C:\LabSolutions\Data\Project1\ces-7-227-02.lcd

Acquired by : Admin  
 Sample Name : ces-7-227-2  
 Sample ID : ces-7-227-2  
 Vial # :  
 Injection Volume : 20 uL  
 Data File Name : ces-7-227-02.lcd  
 Method File Name : ces-OD-H-analytical.lcm  
 Batch File Name :  
 Report File Name : Default.lcr  
 Data Acquired : 1/28/2011 12:22:29 PM  
 Data Processed : 1/28/2011 12:59:18 PM

### <Chromatogram>

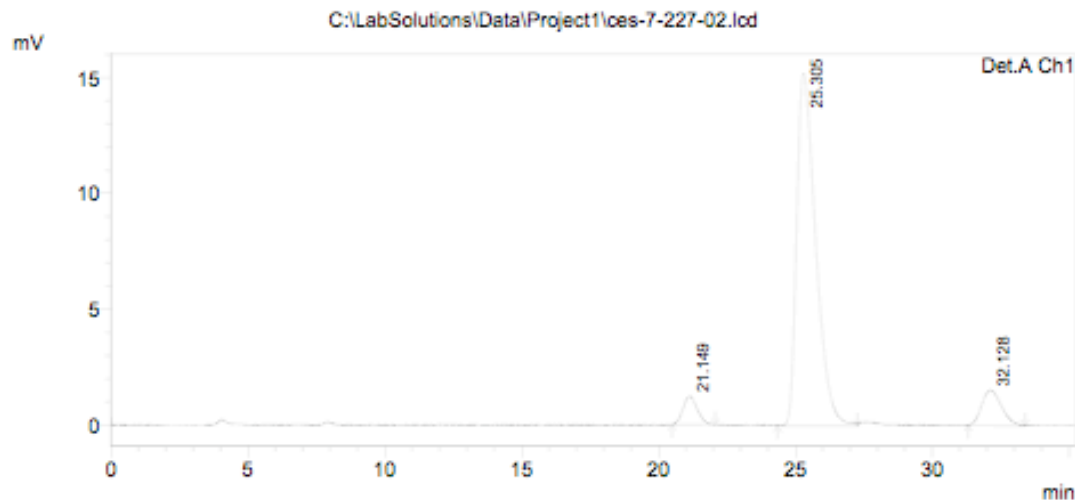

PeakTable

Detector A Ch1 215nm

| Peak# | Ret. Time | Area   | Height | Area %  | Height % |
|-------|-----------|--------|--------|---------|----------|
| 1     | 21.149    | 45238  | 1222   | 5.276   | 6.802    |
| 2     | 25.305    | 736151 | 15221  | 85.851  | 84.709   |
| 3     | 32.128    | 76090  | 1525   | 8.874   | 8.489    |
| Total |           | 857478 | 17968  | 100.000 | 100.000  |

C:\LabSolutions\Data\Project1\ces-7-227-02.lcd

5/27/2011 17:22:23 1 / 1

## ==== Shimadzu LCsolution Analysis Report ====

C:\LabSolutions\Data\Project1\2-phenylpropanoic acid-rac-02.lcd  
 Acquired by : Admin  
 Sample Name : 2-phenylpropanoic acid-rac-2  
 Sample ID : 2-phenylpropanoic acid-rac-2  
 Vial # :  
 Injection Volume : 20 uL  
 Data File Name : 2-phenylpropanoic acid-rac-02.lcd  
 Method File Name : ces-OD-H-analytical.lcm  
 Batch File Name :  
 Report File Name : Default.lcr  
 Data Acquired : 1/28/2011 4:54:06 PM  
 Data Processed : 1/28/2011 7:19:25 PM

### <Chromatogram>

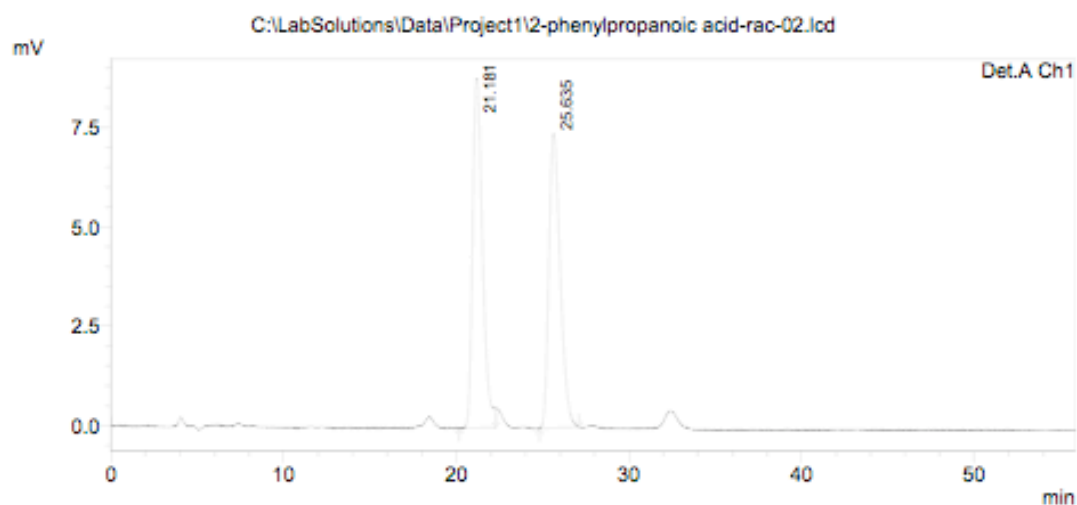

PeakTable

| Peak# | Ret. Time | Area   | Height | Area %  | Height % |
|-------|-----------|--------|--------|---------|----------|
| 1     | 21.181    | 350516 | 8791   | 50.930  | 54.301   |
| 2     | 25.635    | 337709 | 7399   | 49.070  | 45.699   |
| Total |           | 688225 | 16190  | 100.000 | 100.000  |

ces-7-223-a  
 File: nmr400/Zakarian/stivala/ces-7-223-a.fid  
 Pulse Sequence: s2pul  
 Solvent: cdcl3  
 Ambient temperature  
 Operator: stivala  
 File: ces-7-223-a  
 INOVA-500 "nmrserver"

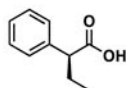

Relax. delay 8.000 sec  
 Pulse 75.0 degrees  
 Acq. time 2.500 sec  
 Width 8002.4 Hz  
 8 repetitions  
 OBSERVE H1, 399.9486908 MHz  
 DATA PROCESSING  
 Line broadening 0.2 Hz  
 FT size 65536  
 Total time 1 min, 26 sec

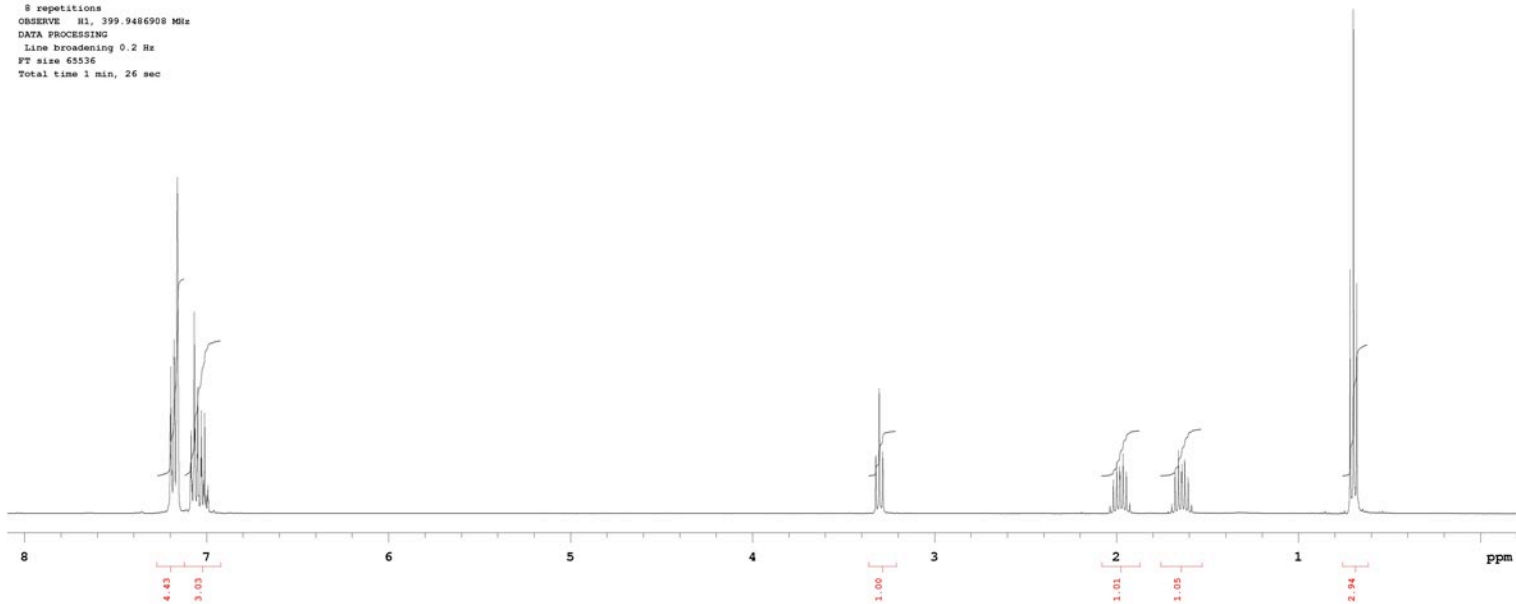

ces-7-223-c13  
 File: nmr400/Zakarian/stivala/ces-7-223-c13.fid  
 Pulse Sequence: s2pul  
 Solvent: cdcl3  
 Ambient temperature  
 Operator: stivala  
 File: ces-7-223-c13  
 INOVA-500 "nmrserver"

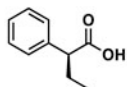

Relax. delay 1.300 sec  
 Pulse 33.8 degrees  
 Acq. time 1.000 sec  
 Width 28040.7 Hz  
 507 repetitions  
 OBSERVE C13, 100.5671099 MHz  
 DECOUPLE H1, 399.956784 MHz  
 Power 40 dB  
 continuously on  
 WALTZ-16 modulated  
 DATA PROCESSING  
 Line broadening 1.0 Hz  
 FT size 65536  
 Total time 8 hr, 12 min, 44 sec

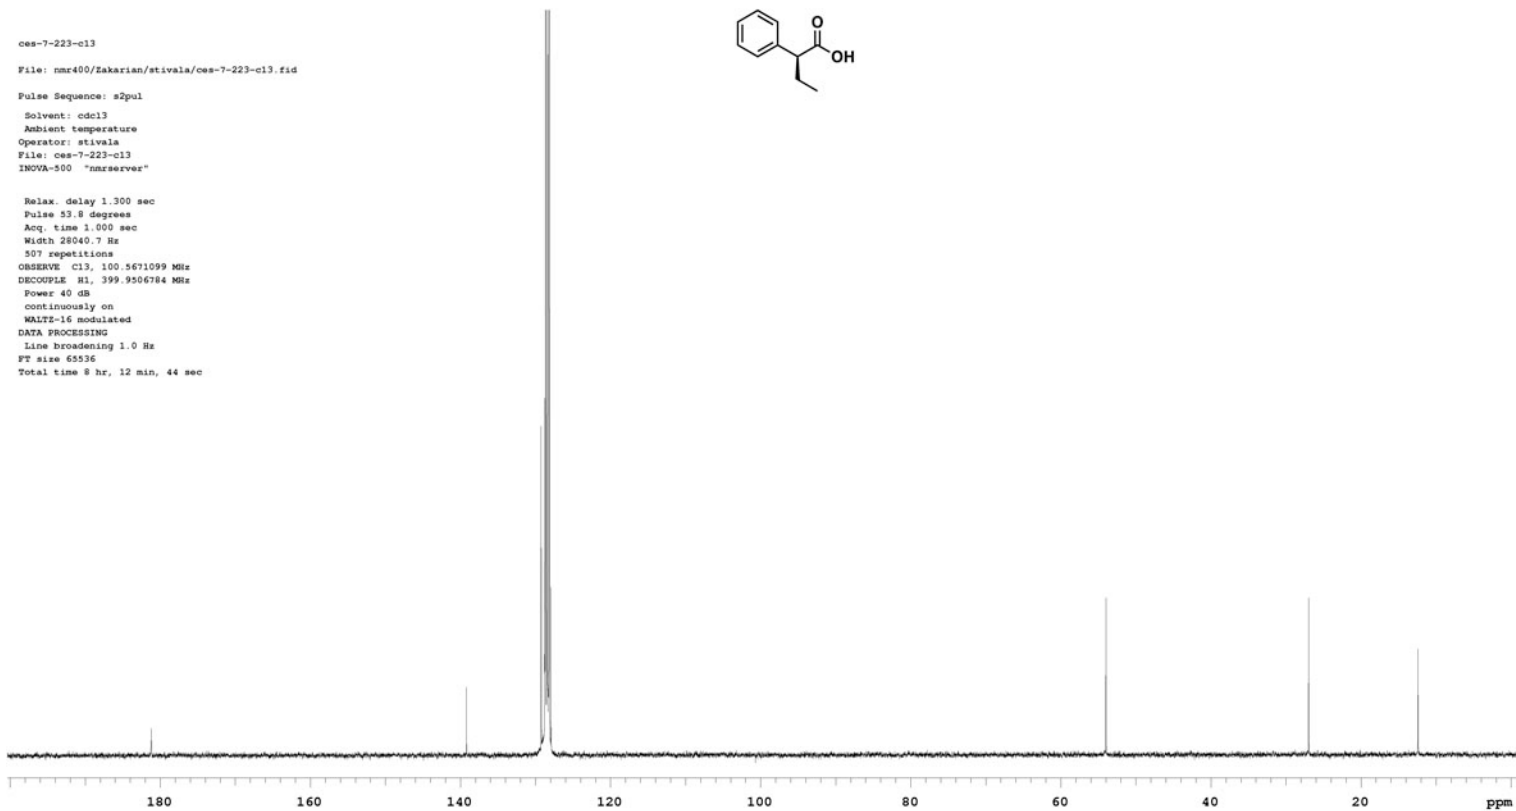

5/27/2011 09:39:14 1 / 1

## ==== Shimadzu LCsolution Analysis Report ====

C:\LabSolutions\Data\Project1\ces-7-223.lcd

Acquired by : Admin  
 Sample Name : ces-7-223  
 Sample ID : ces-7-223  
 Vial # :  
 Injection Volume : 20 uL  
 Data File Name : ces-7-223.lcd  
 Method File Name : ces-OD-H-analytical.lcm  
 Batch File Name :  
 Report File Name : Default.lcr  
 Data Acquired : 1/24/2011 4:36:34 PM  
 Data Processed : 1/24/2011 6:23:08 PM

### <Chromatogram>

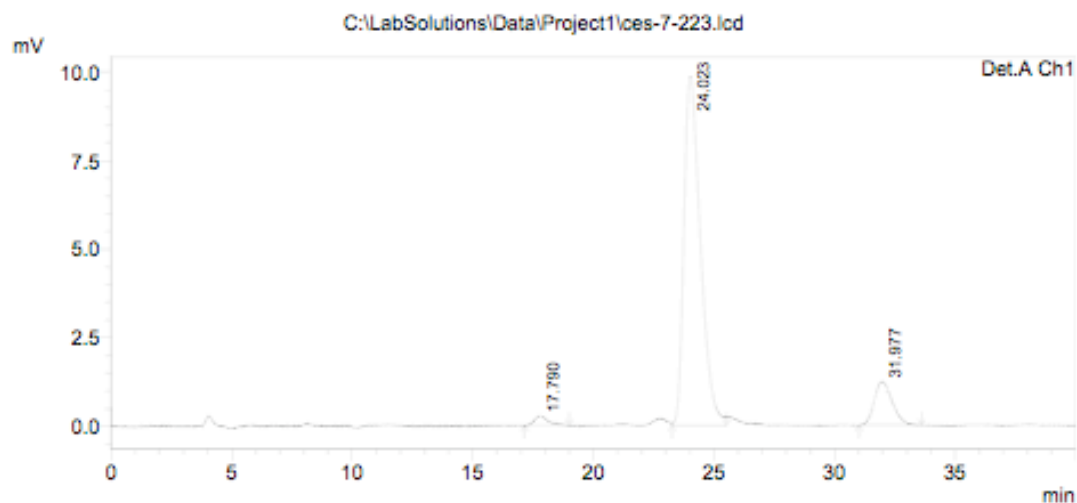

1 Det.A Ch1/215nm

PeakTable

Detector A Ch1 215nm

| Peak# | Ret. Time | Area   | Height | Area %  | Height % |
|-------|-----------|--------|--------|---------|----------|
| 1     | 17.790    | 10200  | 268    | 1.874   | 2.363    |
| 2     | 24.023    | 470403 | 9840   | 86.417  | 86.811   |
| 3     | 31.977    | 63736  | 1227   | 11.709  | 10.826   |
| Total |           | 544339 | 11335  | 100.000 | 100.000  |

C:\LabSolutions\Data\Project1\ces-7-223.lcd

5/27/2011 11:10:47 1 / 1

## ==== Shimadzu LCsolution Analysis Report ====

C:\LabSolutions\Data\Project1\ces-7-219-rac01.lcd

Acquired by : Admin  
 Sample Name : ces-7-219-rac  
 Sample ID : ces-7-219-rac  
 Vial # :  
 Injection Volume : 20 uL  
 Data File Name : ces-7-219-rac01.lcd  
 Method File Name : ces-OD-H-analytical.lcm  
 Batch File Name :  
 Report File Name : Default.lcr  
 Data Acquired : 1/24/2011 5:32:23 PM  
 Data Processed : 1/24/2011 6:23:46 PM

### <Chromatogram>

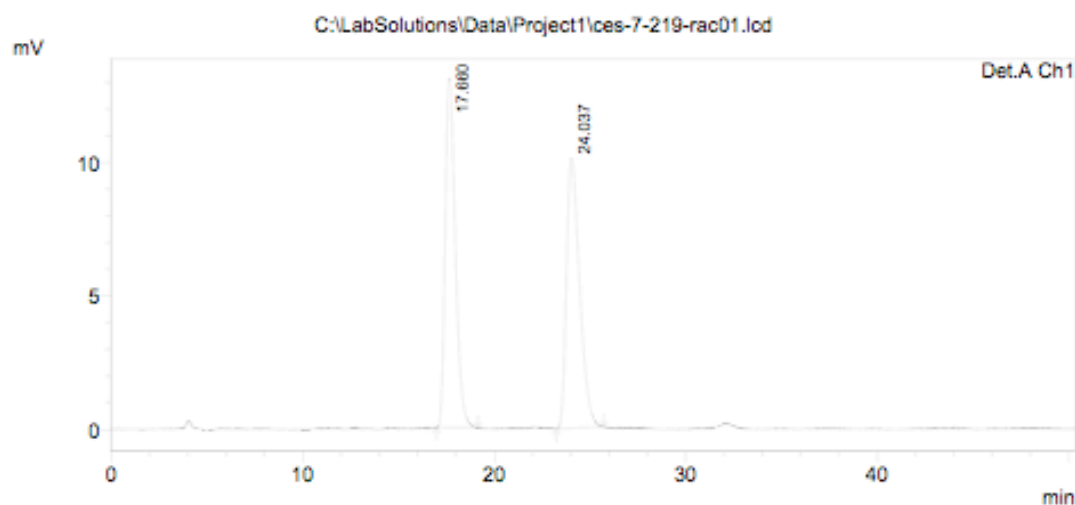

1 Det.A Ch1/215nm

PeakTable

Detector A Ch1 215nm

| Peak# | Ret. Time | Area   | Height | Area %  | Height % |
|-------|-----------|--------|--------|---------|----------|
| 1     | 17.660    | 480361 | 13087  | 49.888  | 56.386   |
| 2     | 24.037    | 482509 | 10123  | 50.112  | 43.614   |
| Total |           | 962870 | 23209  | 100.000 | 100.000  |

C:\LabSolutions\Data\Project1\ces-7-219-rac01.lcd

ces-7-263-a  
 File: nmr500/Zakarian/stivala/ces-7-263-a.fid  
 Pulse Sequence: s2pul  
 Solvent: CDCl3  
 Ambient temperature  
 Operator: stivala  
 File: ces-7-263-a  
 INOVA-500 "nmrserver"

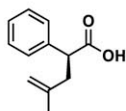

Relax. delay 8.000 sec  
 Pulse 74.9 degrees  
 Acq. time 2.500 sec  
 Width 8503.4 Hz  
 8 repetitions  
 OBSERVE H1, 499.8560744 MHz  
 DATA PROCESSING  
 Line Broadening 0.2 Hz  
 FT size 32768  
 Total time 1 min, 24 sec

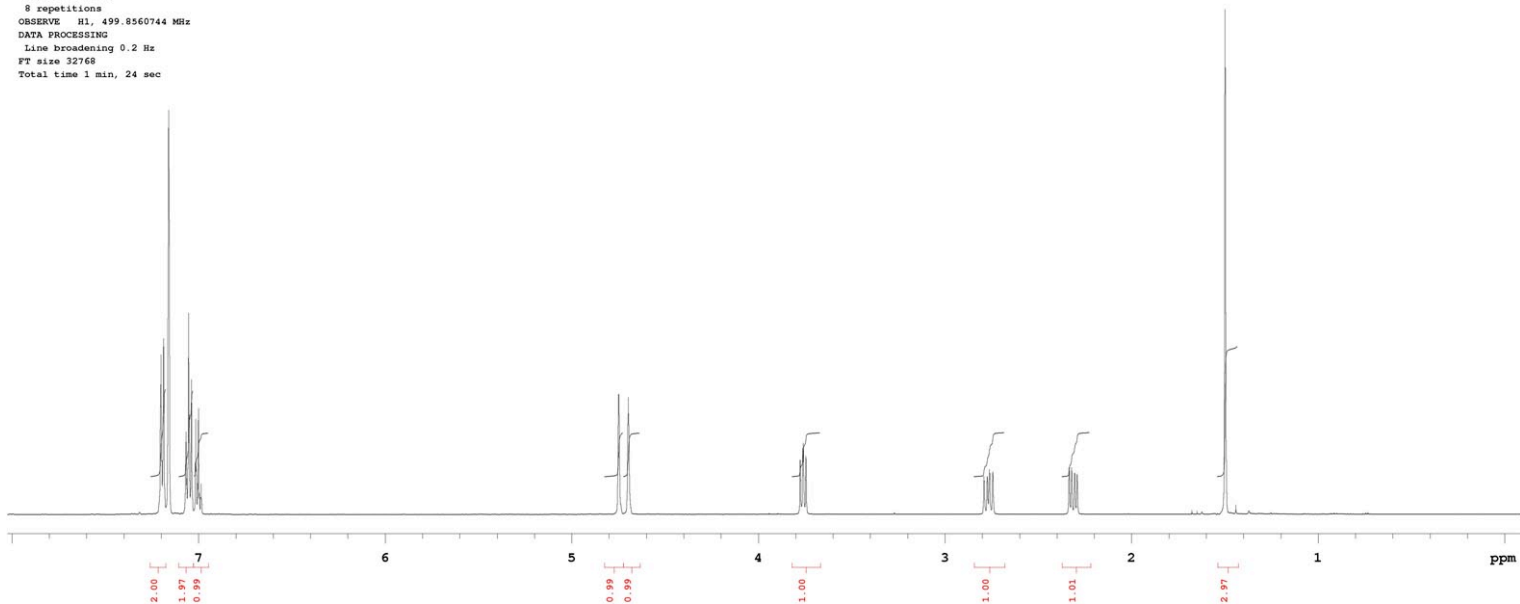

ces-7-263-a-c13  
 File: nmr500/Zakarian/stivala/ces-7-263-a-c13.fid  
 Pulse Sequence: s2pul  
 Solvent: CDCl3  
 Ambient temperature  
 Operator: stivala  
 File: ces-7-263-a-c13  
 INOVA-500 "nmrserver"

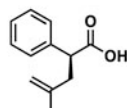

Relax. delay 0.200 sec  
 Pulse 90.0 degrees  
 Acq. time 1.300 sec  
 Width 36003.6 Hz  
 1471 repetitions  
 OBSERVE C13, 125.6888208 MHz  
 DECOUPLE H1, 499.8560468 MHz  
 Power 16 dB  
 on during acquisition  
 off during delay  
 WALTZ-16 modulated  
 DATA PROCESSING  
 Line Broadening 0.5 Hz  
 FT size 131072  
 Total time 419 hr, 16 min, 30 sec

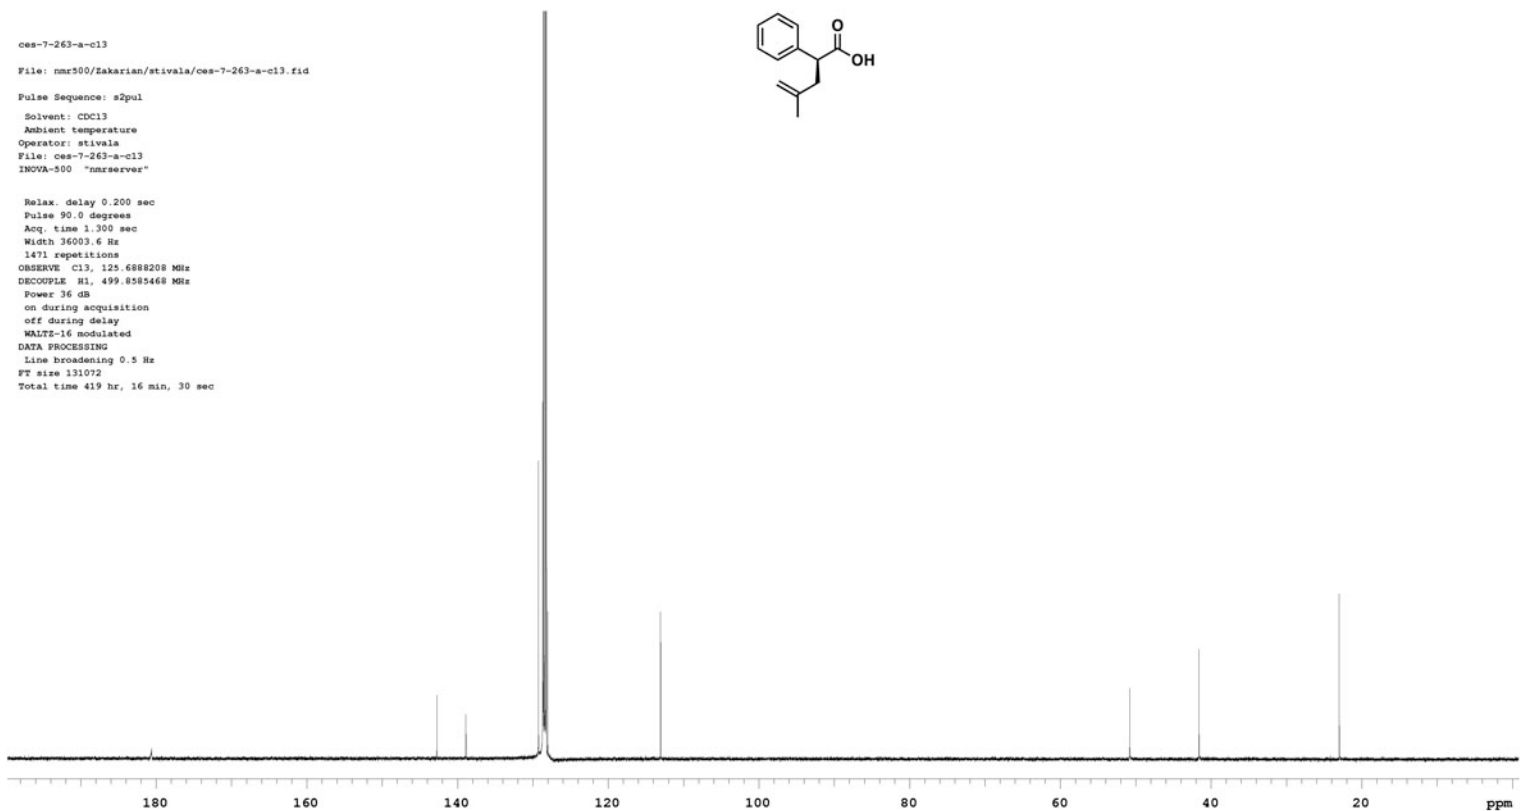

5/27/2011 09:44:12 1 / 1

## ==== Shimadzu LCsolution Analysis Report ====

C:\LabSolutions\Data\Project1\ces-7-263.lcd

Acquired by : Admin  
 Sample Name : ces-7-263  
 Sample ID : ces-7-263  
 Vial # :  
 Injection Volume : 25 uL  
 Data File Name : ces-7-263.lcd  
 Method File Name : ces-OD-H-analytical.lcm  
 Batch File Name :  
 Report File Name : Default.lcr  
 Data Acquired : 2/23/2011 9:38:29 PM  
 Data Processed : 2/23/2011 10:18:56 PM

### <Chromatogram>

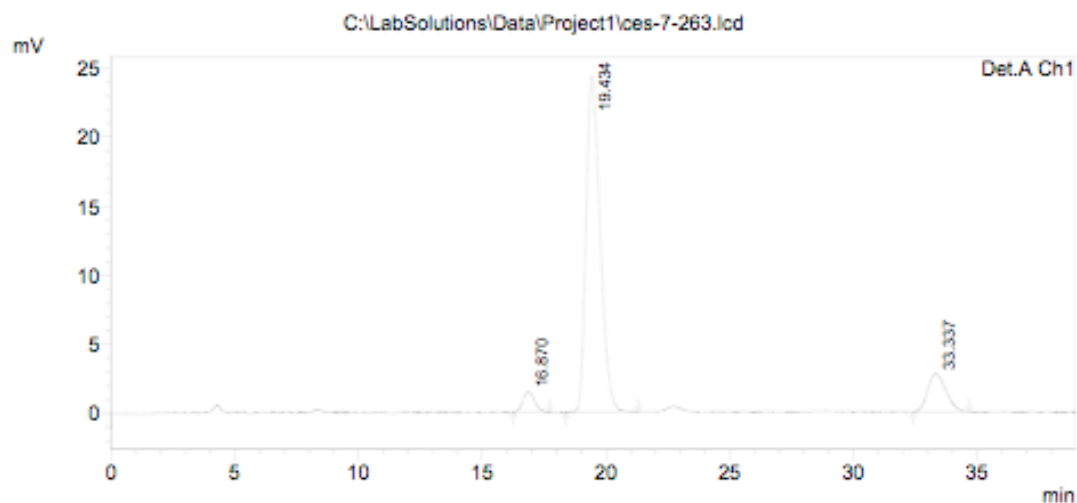

1 Det.A Ch1/215nm

PeakTable

Detector A Ch1 215nm

| Peak# | Ret. Time | Area    | Height | Area %  | Height % |
|-------|-----------|---------|--------|---------|----------|
| 1     | 16.870    | 48248   | 1473   | 4.162   | 5.161    |
| 2     | 19.434    | 969361  | 24306  | 83.610  | 85.158   |
| 3     | 33.337    | 141772  | 2763   | 12.228  | 9.681    |
| Total |           | 1159382 | 28542  | 100.000 | 100.000  |

C:\LabSolutions\Data\Project1\ces-7-263.lcd



5/27/2011 11:14:52 1 / 1

## ==== Shimadzu LCsolution Analysis Report ====

C:\LabSolutions\Data\Project1\ces-7-233-rac01.lcd

Acquired by : Admin  
 Sample Name : ces-7-233-rac  
 Sample ID : ces-7-233-rac  
 Vial # :  
 Injection Volume : 20 uL  
 Data File Name : ces-7-233-rac01.lcd  
 Method File Name : ces-OD-H-analytical.lcm  
 Batch File Name :  
 Report File Name : Default.lcr  
 Data Acquired : 2/2/2011 5:08:42 PM  
 Data Processed : 2/2/2011 6:33:39 PM

### <Chromatogram>

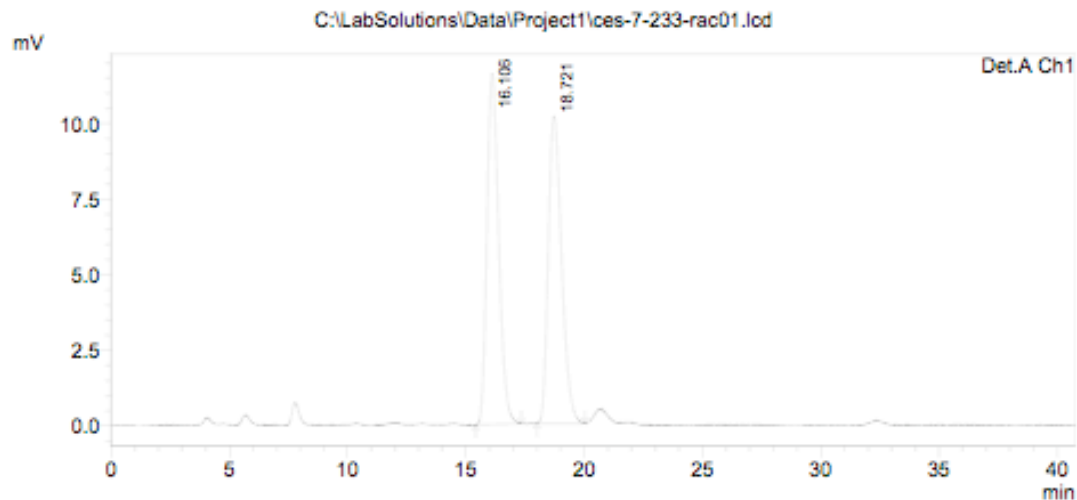

1 Det.A Ch1/215nm

PeakTable

Detector A Ch1 215nm

| Peak# | Ret. Time | Area   | Height | Area %  | Height % |
|-------|-----------|--------|--------|---------|----------|
| 1     | 16.106    | 402932 | 11607  | 50.332  | 53.360   |
| 2     | 18.721    | 397624 | 10145  | 49.668  | 46.640   |
| Total |           | 800556 | 21752  | 100.000 | 100.000  |

C:\LabSolutions\Data\Project1\ces-7-233-rac01.lcd

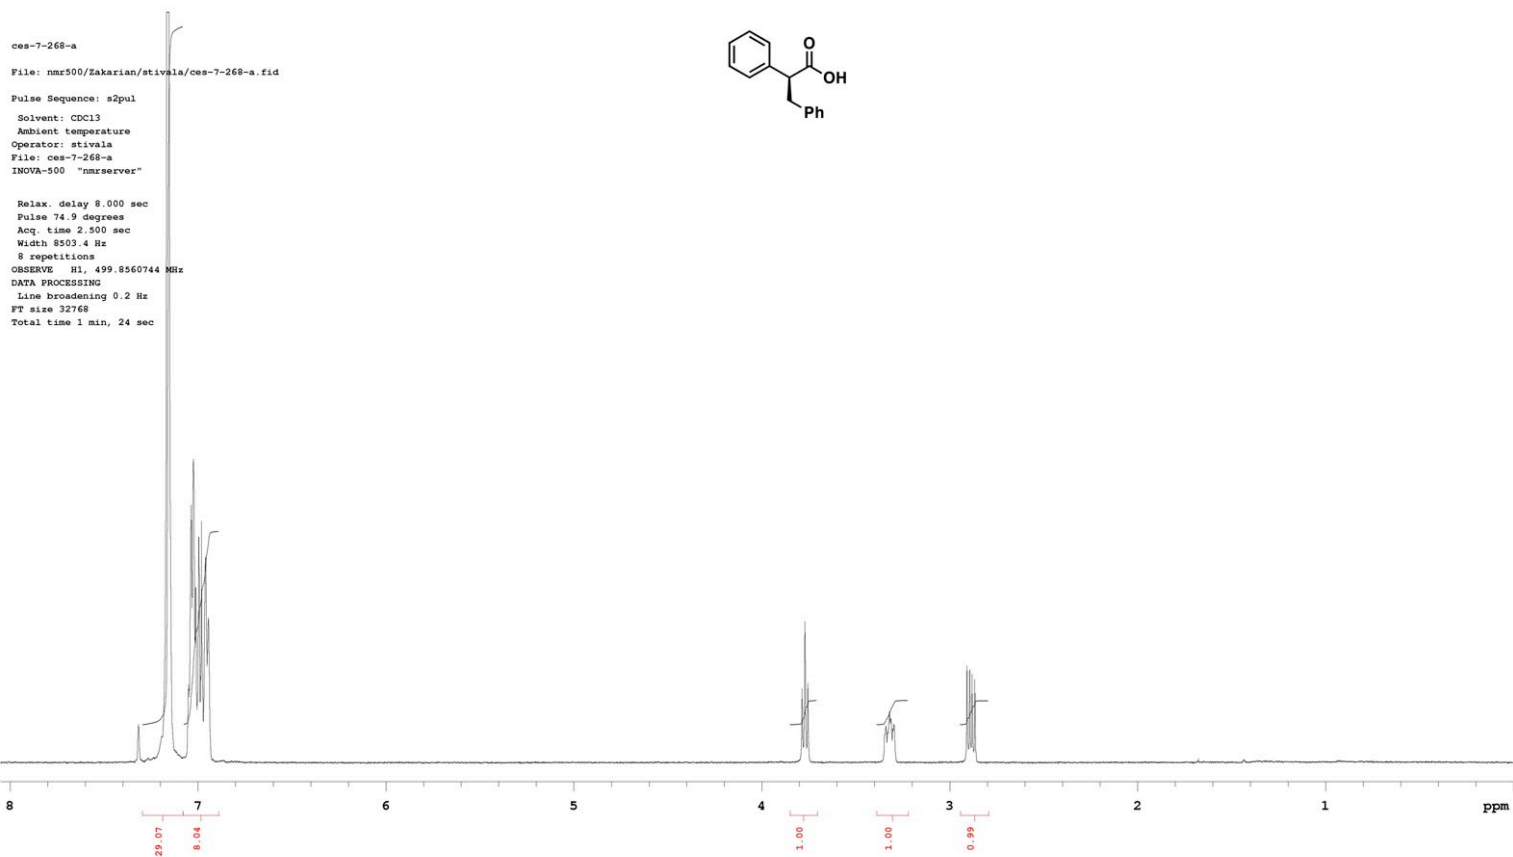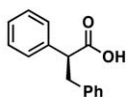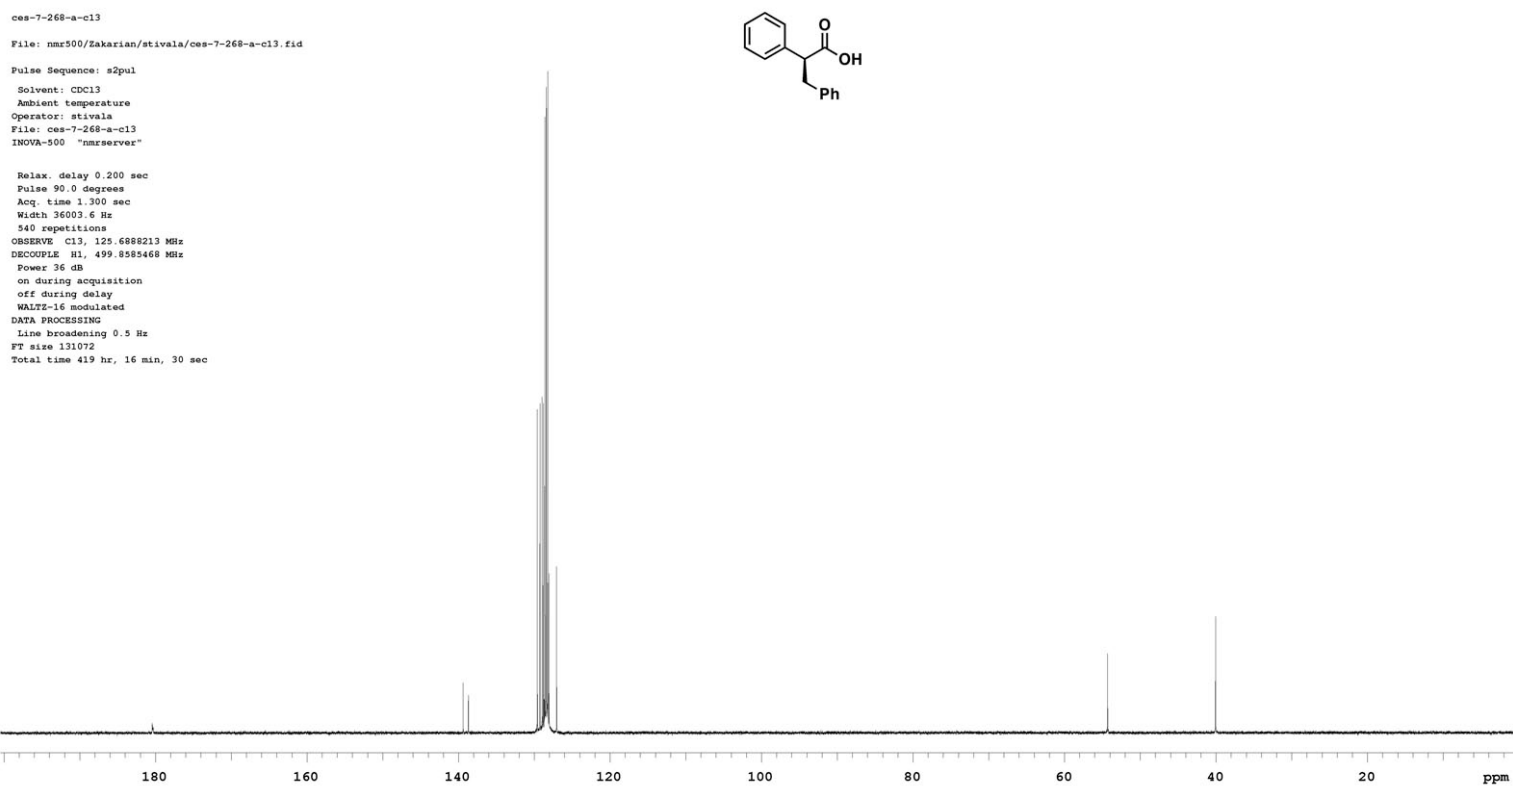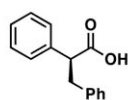

5/27/2011 09:45:06 1 / 1

## ==== Shimadzu LCsolution Analysis Report ====

C:\LabSolutions\Data\Project1\ces-7-268.lcd

Acquired by : Admin  
 Sample Name : ces-7-268  
 Sample ID : ces-7-268  
 Vial # :  
 Injection Volume : 20 uL  
 Data File Name : ces-7-268.lcd  
 Method File Name : ces-OJ-H-analytical.lcm  
 Batch File Name :  
 Report File Name : Default.lcr  
 Data Acquired : 2/25/2011 8:43:09 PM  
 Data Processed : 2/26/2011 12:13:10 PM

### <Chromatogram>

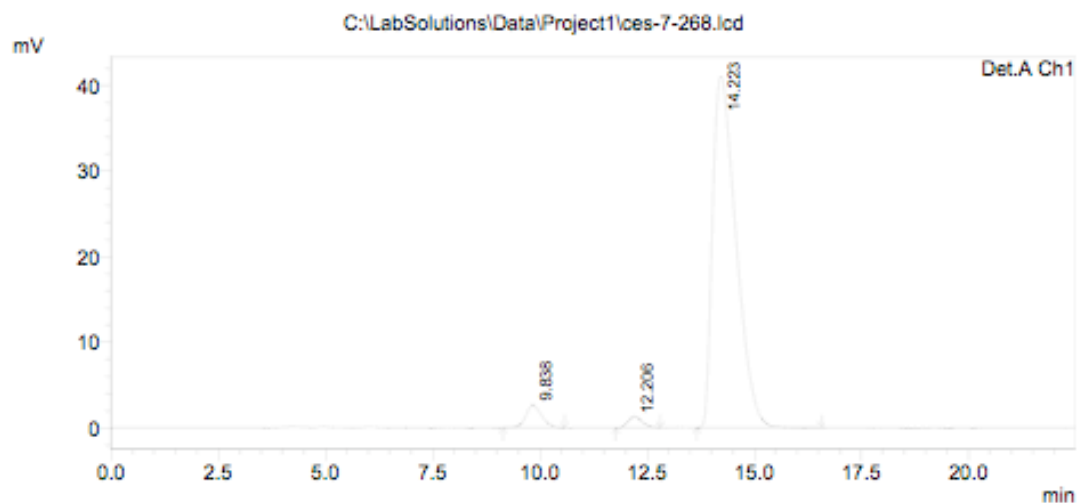

1 Det.A Ch1/215nm

PeakTable

Detector A Ch1 215nm

| Peak# | Ret. Time | Area    | Height | Area %  | Height % |
|-------|-----------|---------|--------|---------|----------|
| 1     | 9.838     | 69262   | 2628   | 4.164   | 5.847    |
| 2     | 12.206    | 30868   | 1286   | 1.856   | 2.861    |
| 3     | 14.223    | 1563036 | 41035  | 93.980  | 91.292   |
| Total |           | 1663166 | 44949  | 100.000 | 100.000  |

C:\LabSolutions\Data\Project1\ces-7-268.lcd

5/27/2011 11:03:11 1 / 1

## ==== Shimadzu LCsolution Analysis Report ====

C:\LabSolutions\Data\Project1\ces-7-79-rac-01.lcd

|                  |                           |
|------------------|---------------------------|
| Acquired by      | : Admin                   |
| Sample Name      | : ces-7-79-rac            |
| Sample ID        | : ces-7-79-rac            |
| Vial #           | :                         |
| Injection Volume | : 20 uL                   |
| Data File Name   | : ces-7-79-rac-01.lcd     |
| Method File Name | : ces-OJ-H-analytical.lcm |
| Batch File Name  | :                         |
| Report File Name | : Default.lcr             |
| Data Acquired    | : 11/4/2010 2:09:58 PM    |
| Data Processed   | : 11/4/2010 4:10:00 PM    |

## &lt;Chromatogram&gt;

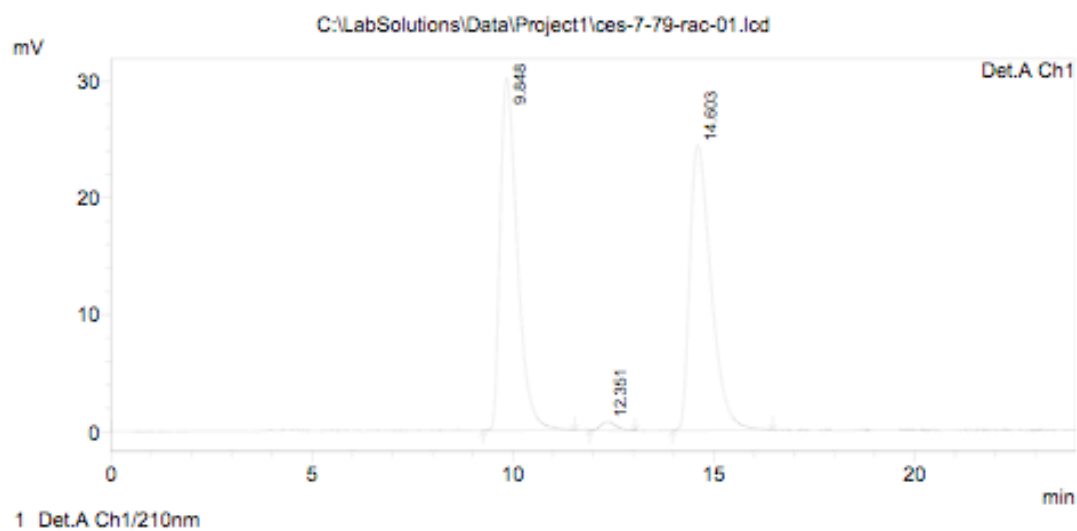

C:\LabSolutions\Data\Project1\ces-7-79-rac-01.lcd

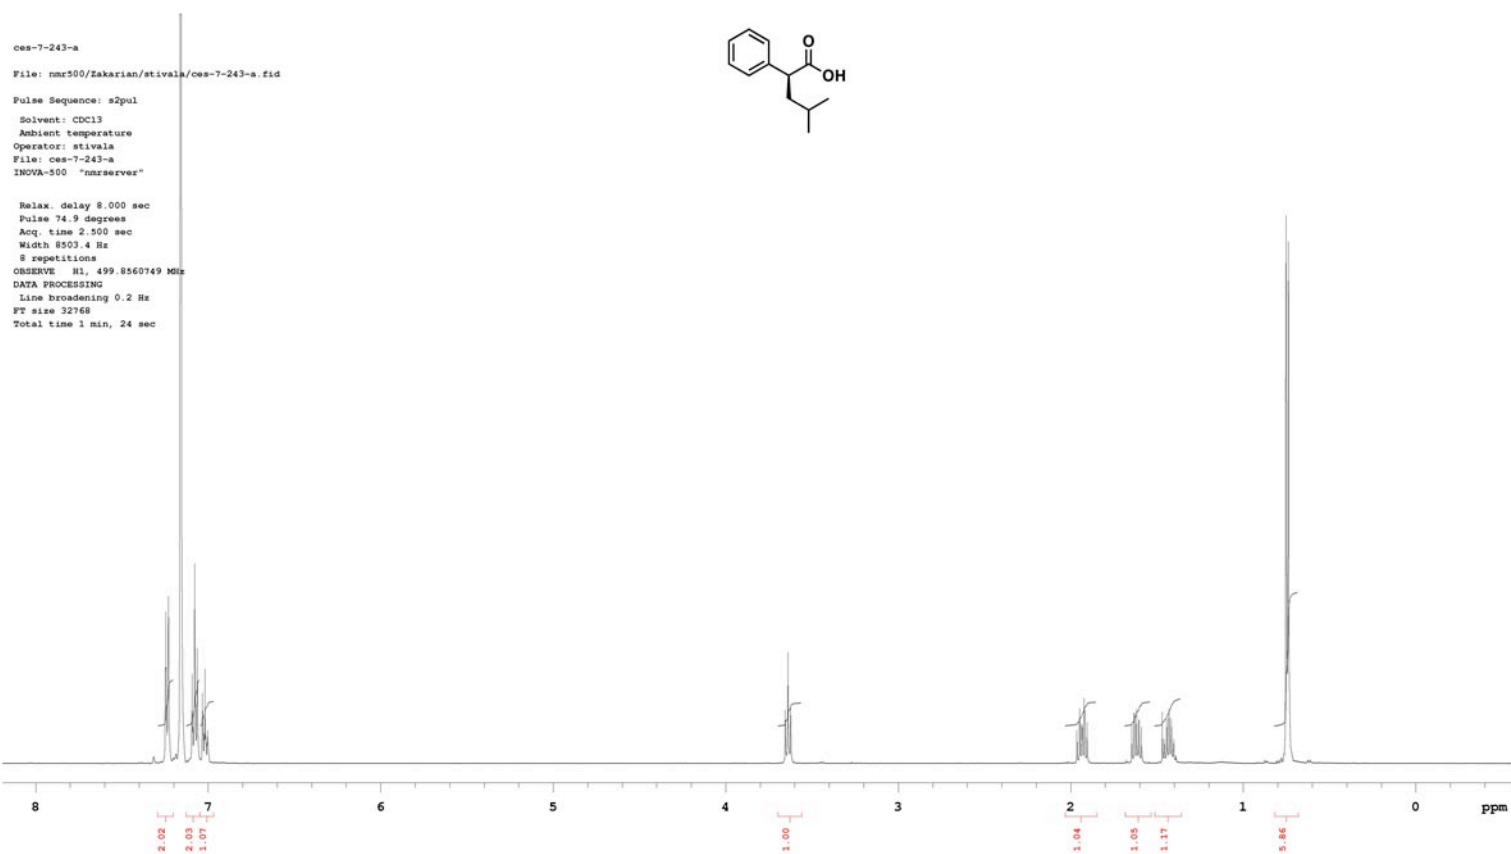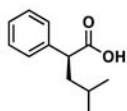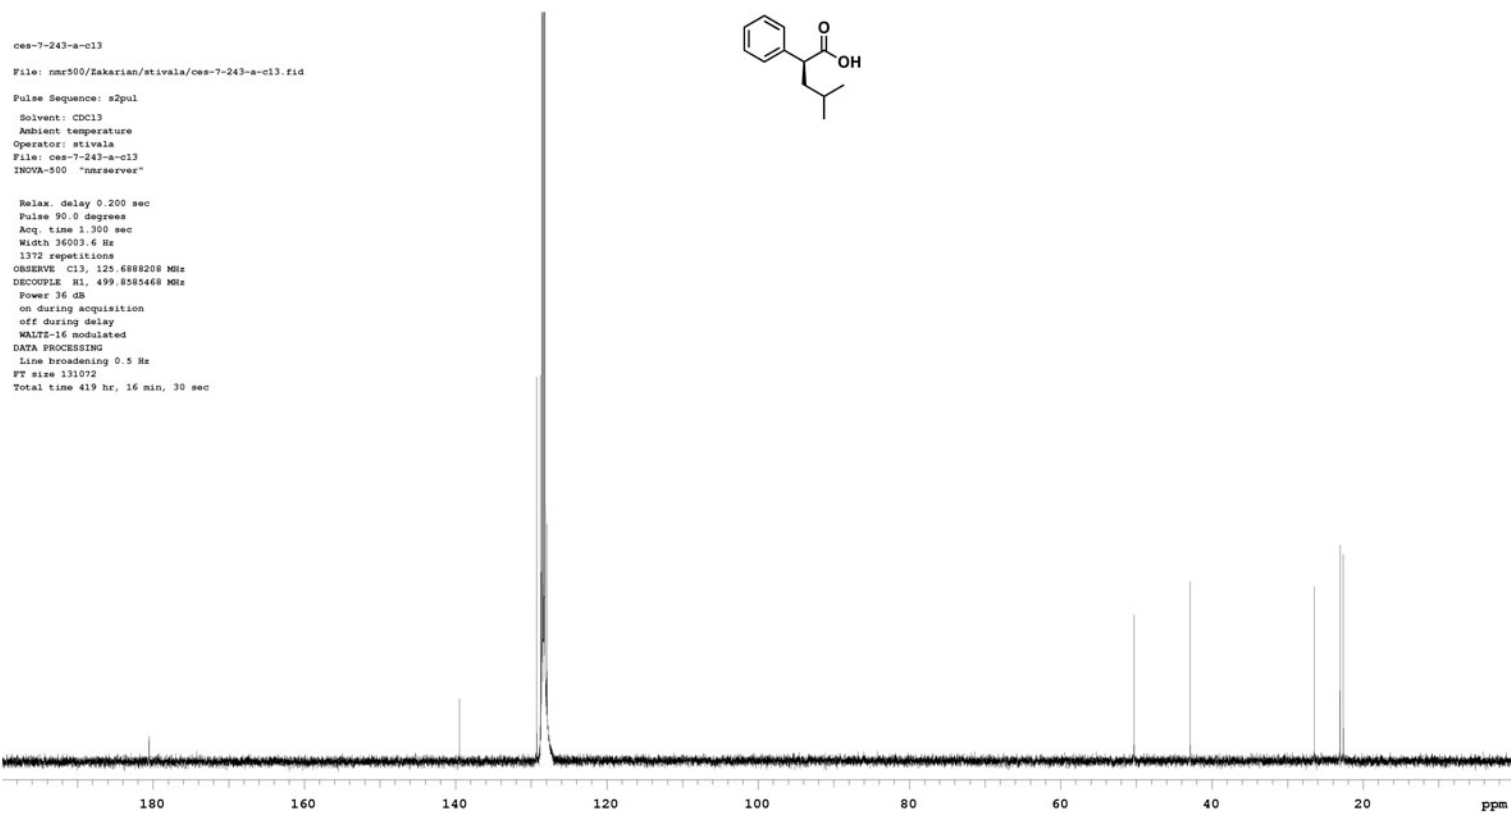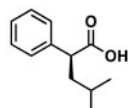

5/27/2011 09:46:09 1 / 1

## ==== Shimadzu LCsolution Analysis Report ====

C:\LabSolutions\Data\Project1\ces-7-243.lcd

Acquired by : Admin  
 Sample Name : ces-7-243  
 Sample ID : ces-7-243  
 Vial # :  
 Injection Volume : 20 uL  
 Data File Name : ces-7-243.lcd  
 Method File Name : ces-OD-H-analytical.lcm  
 Batch File Name :  
 Report File Name : Default.lcr  
 Data Acquired : 2/7/2011 6:37:22 PM  
 Data Processed : 2/7/2011 7:24:38 PM

### <Chromatogram>

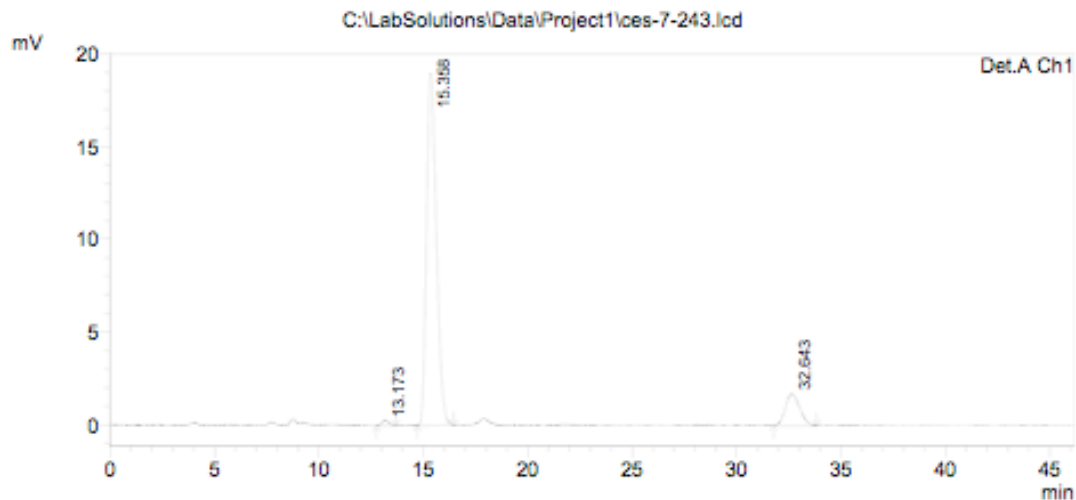

PeakTable

Detector A Ch1 215nm

| Peak# | Ret. Time | Area   | Height | Area %  | Height % |
|-------|-----------|--------|--------|---------|----------|
| 1     | 13.173    | 7098   | 274    | 0.996   | 1.304    |
| 2     | 15.358    | 621703 | 18980  | 87.232  | 90.485   |
| 3     | 32.643    | 83901  | 1722   | 11.772  | 8.211    |
| Total |           | 712702 | 20975  | 100.000 | 100.000  |

C:\LabSolutions\Data\Project1\ces-7-243.lcd

5/27/2011 14:33:50 1 / 1

## ==== Shimadzu LCsolution Analysis Report ====

C:\LabSolutions\Data\Project1\ces-7-221-02.lcd

Acquired by : Admin  
 Sample Name : ces-7-221  
 Sample ID : ces-7-221  
 Vial # :  
 Injection Volume : 25 uL  
 Data File Name : ces-7-221-02.lcd  
 Method File Name : ces-OD-H-analytical 0.46cm x 25cm.lcm  
 Batch File Name :  
 Report File Name : Default.lcr  
 Data Acquired : 5/27/2011 2:12:54 PM  
 Data Processed : 5/27/2011 2:32:53 PM

### <Chromatogram>

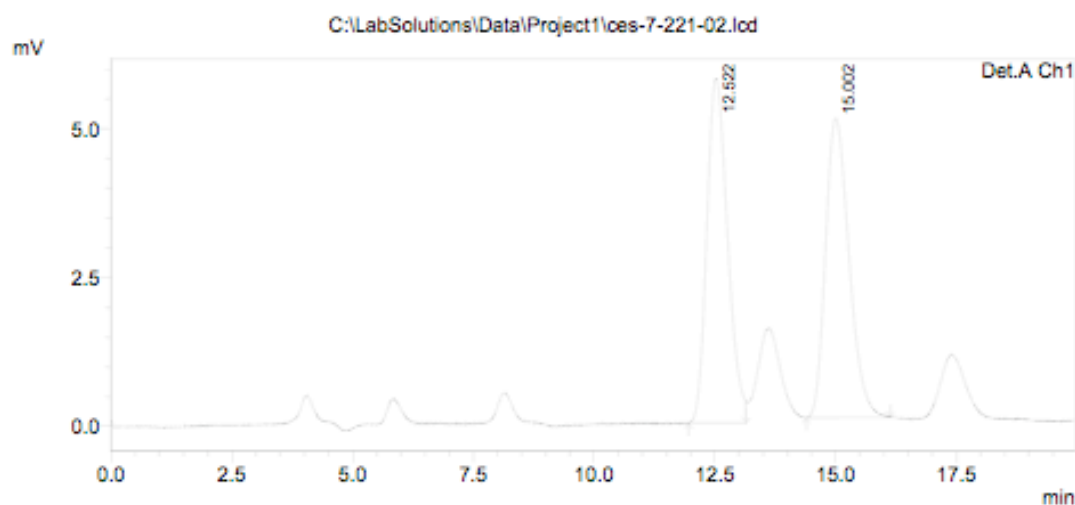

1 Det.A Ch1/215nm

PeakTable

Detector A Ch1 215nm

| Peak# | Ret. Time | Area   | Height | Area %  | Height % |
|-------|-----------|--------|--------|---------|----------|
| 1     | 12.522    | 172383 | 5782   | 50.362  | 53.525   |
| 2     | 15.002    | 169906 | 5021   | 49.638  | 46.475   |
| Total |           | 342289 | 10803  | 100.000 | 100.000  |

C:\LabSolutions\Data\Project1\ces-7-221-02.lcd

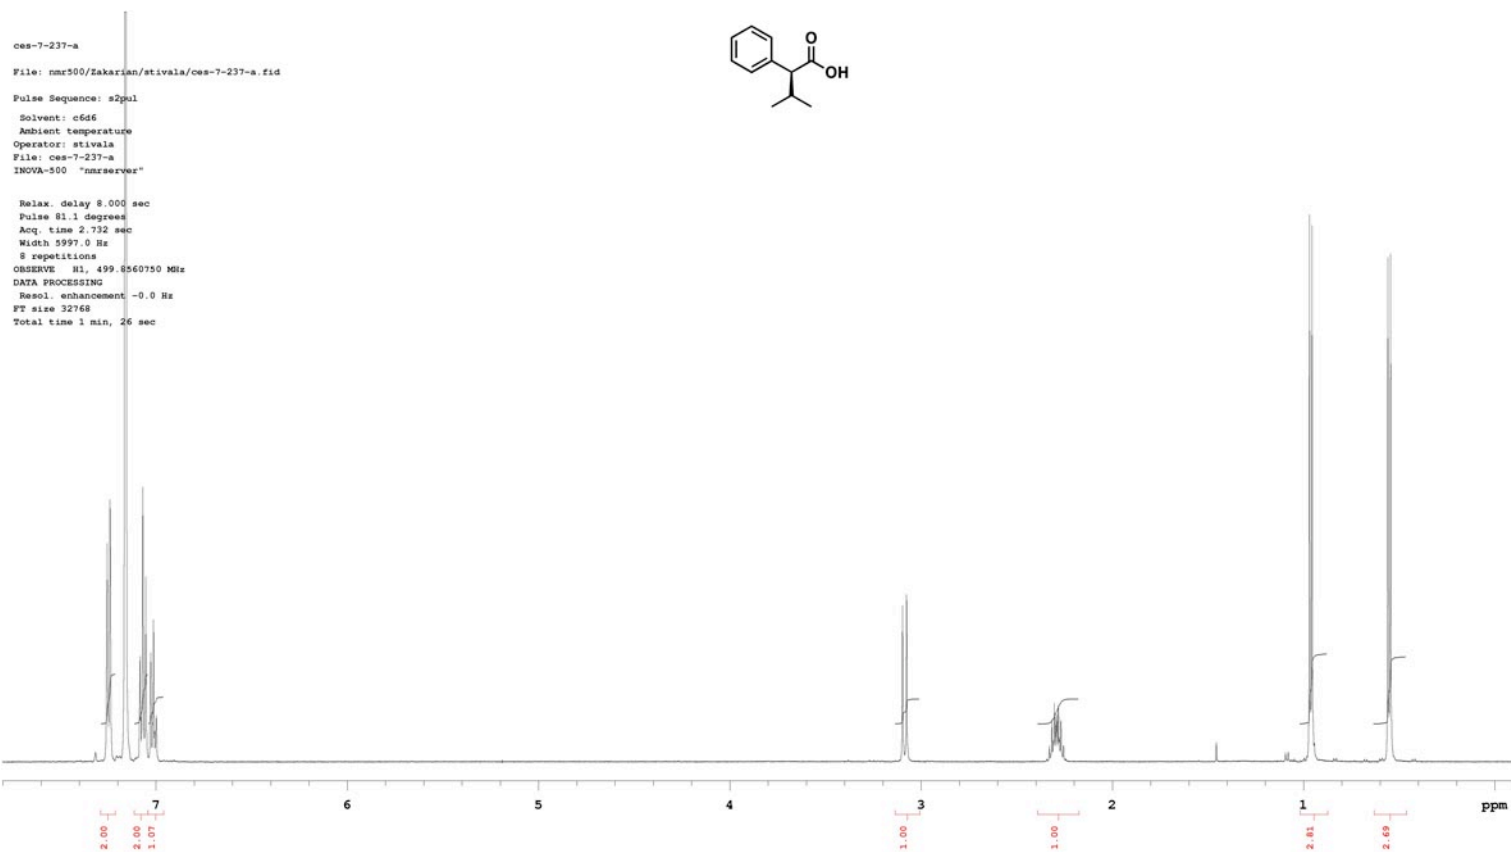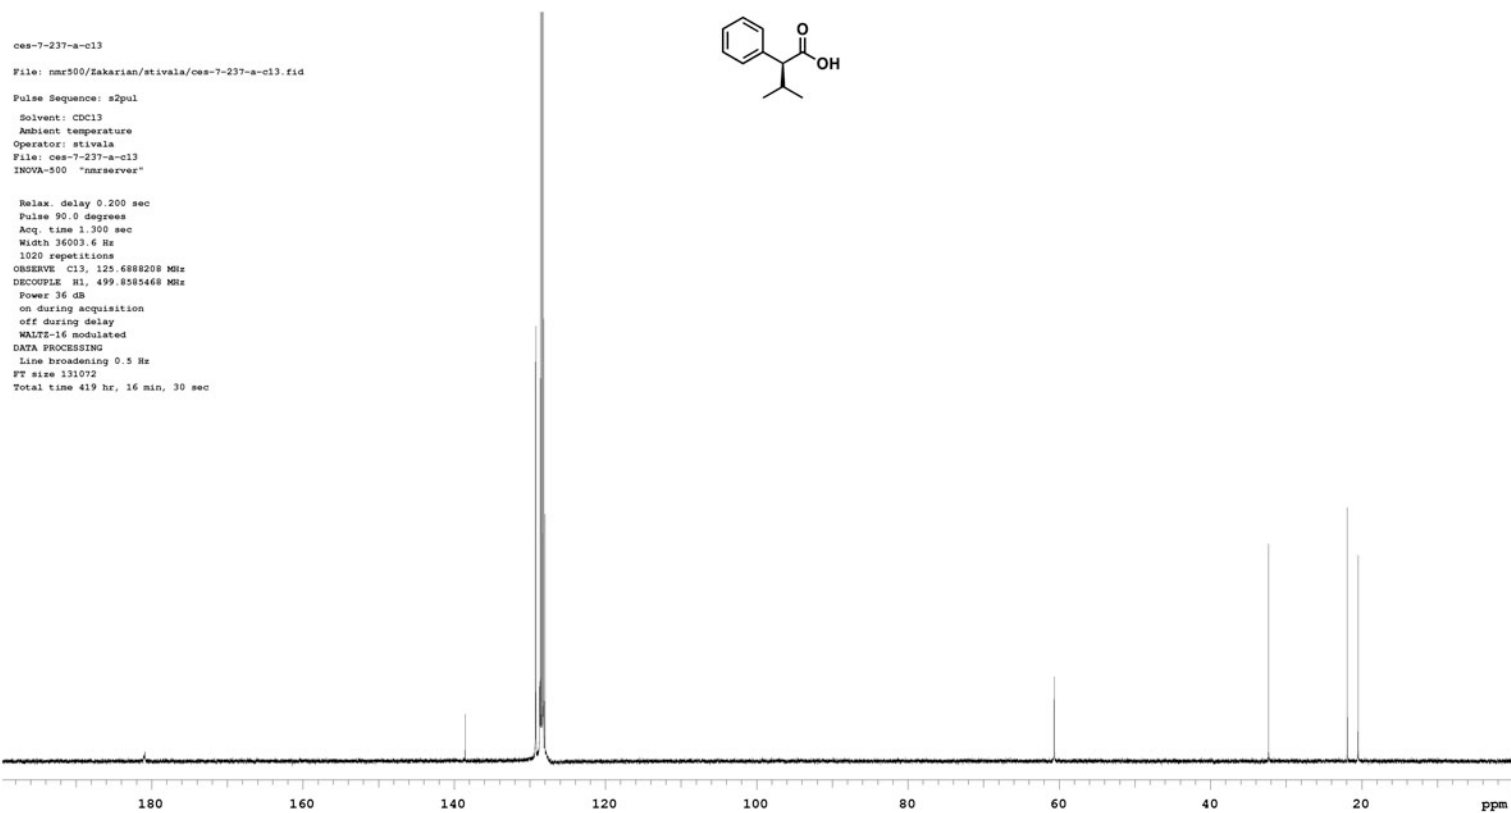



5/27/2011 09:47:11 1 / 1

## ==== Shimadzu LCsolution Analysis Report ====

C:\LabSolutions\Data\Project1\ces-7-237.lcd

Acquired by : Admin  
 Sample Name : ces-7-237  
 Sample ID : ces-7-237  
 Vial # :  
 Injection Volume : 20 uL  
 Data File Name : ces-7-237.lcd  
 Method File Name : ces-OD-H-analytical.lcm  
 Batch File Name :  
 Report File Name : Default.lcr  
 Data Acquired : 2/5/2011 5:02:41 PM  
 Data Processed : 2/5/2011 5:55:38 PM

### <Chromatogram>

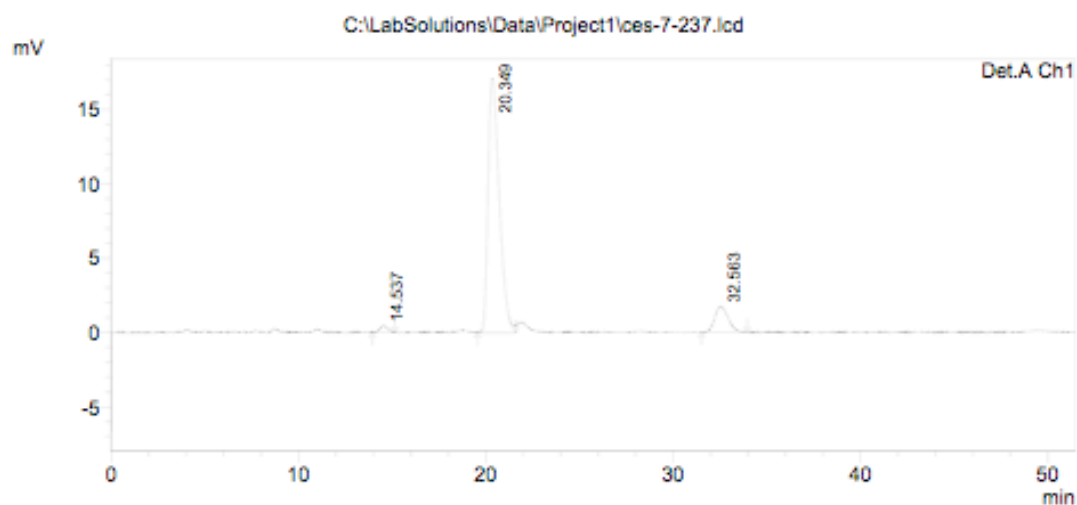

1 Det.A Ch1/215nm

PeakTable

Detector A Ch1 215nm

| Peak# | Ret. Time | Area   | Height | Area %  | Height % |
|-------|-----------|--------|--------|---------|----------|
| 1     | 14.537    | 12138  | 432    | 1.491   | 2.243    |
| 2     | 20.349    | 716696 | 17091  | 88.035  | 88.750   |
| 3     | 32.563    | 85265  | 1734   | 10.474  | 9.006    |
| Total |           | 814100 | 19257  | 100.000 | 100.000  |

C:\LabSolutions\Data\Project1\ces-7-237.lcd

5/27/2011 18:48:48 1 / 1

## ==== Shimadzu LCsolution Analysis Report ====

C:\LabSolutions\Data\Project1\ces-7-220-03.lcd

Acquired by : Admin  
 Sample Name : ces-7-220  
 Sample ID : ces-7-220  
 Vial # :  
 Injection Volume : 25 uL  
 Data File Name : ces-7-220-03.lcd  
 Method File Name : ces-OD-H-analytical 0.46cm x 25cm.lcm  
 Batch File Name :  
 Report File Name : Default.lcr  
 Data Acquired : 5/27/2011 6:15:00 PM  
 Data Processed : 5/27/2011 6:43:23 PM

### <Chromatogram>

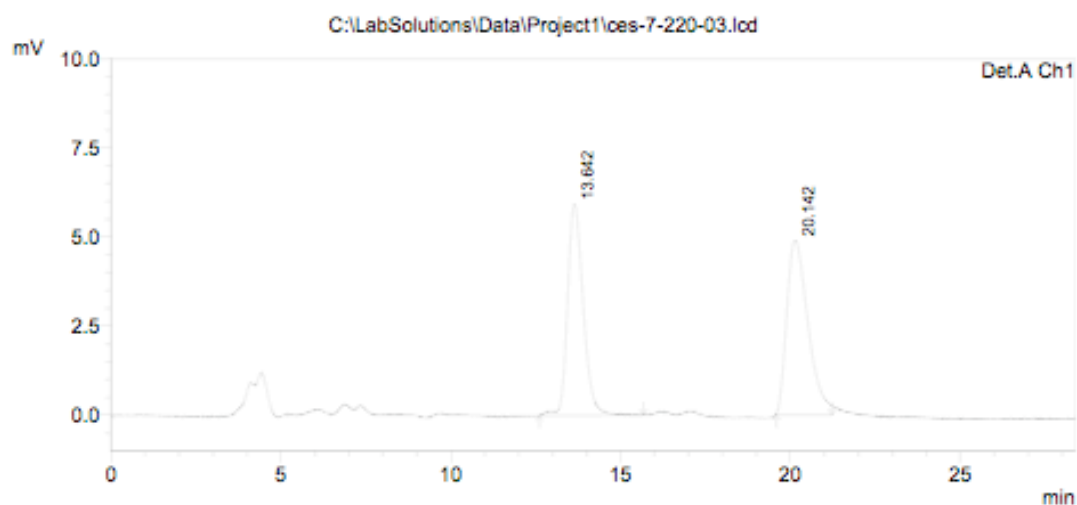

1 Det.A Ch1/215nm

PeakTable

Detector A Ch1 215nm

| Peak# | Ret. Time | Area   | Height | Area %  | Height % |
|-------|-----------|--------|--------|---------|----------|
| 1     | 13.642    | 189468 | 5920   | 47.164  | 54.720   |
| 2     | 20.142    | 212257 | 4899   | 52.836  | 45.280   |
| Total |           | 401725 | 10819  | 100.000 | 100.000  |

C:\LabSolutions\Data\Project1\ces-7-220-03.lcd

## HPLC trace of (S)-3-methyl-2-phenylbutanoic acid, 10 gram scale:

6/1/2011 10:15:10 1 / 1

## ==== Shimadzu LCsolution Analysis Report ====

C:\LabSolutions\Data\Project1\ces-8-111-02.lcd

Acquired by : Admin  
 Sample Name : ces-8-111 (10 gram scale)  
 Sample ID : ces-8-111 (10 gram scale)  
 Vial # :  
 Injection Volume : 25 uL  
 Data File Name : ces-8-111-02.lcd  
 Method File Name : ces-OD-H-analytical 0.46cm x 25cm.lcm  
 Batch File Name :  
 Report File Name : Default.lcr  
 Data Acquired : 5/30/2011 12:06:44 PM  
 Data Processed : 5/30/2011 12:41:27 PM

## &lt;Chromatogram&gt;

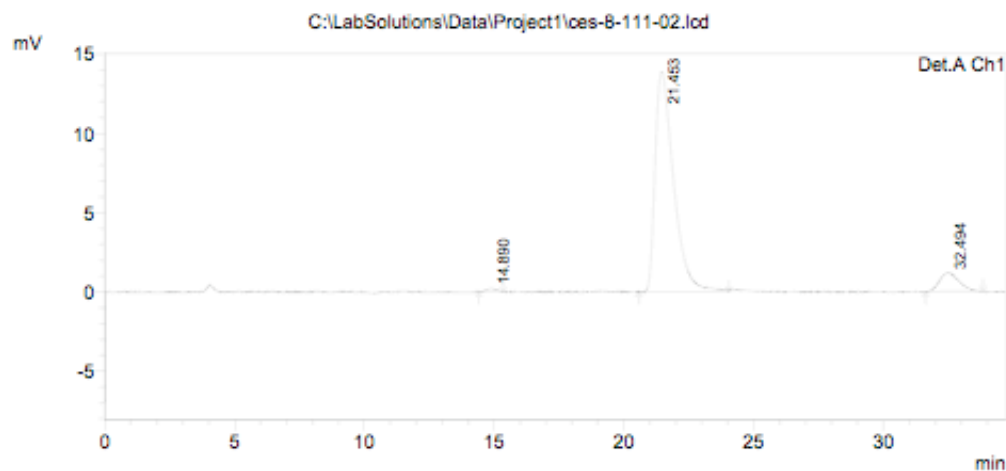

PeakTable

| Peak# | Ret. Time | Area   | Height | Area %  | Height % |
|-------|-----------|--------|--------|---------|----------|
| 1     | 14.890    | 5738   | 203    | 0.756   | 1.327    |
| 2     | 21.453    | 690514 | 13895  | 90.995  | 90.903   |
| 3     | 32.494    | 62595  | 1188   | 8.249   | 7.770    |
| Total |           | 758846 | 15285  | 100.000 | 100.000  |

C:\LabSolutions\Data\Project1\ces-8-111-02.lcd

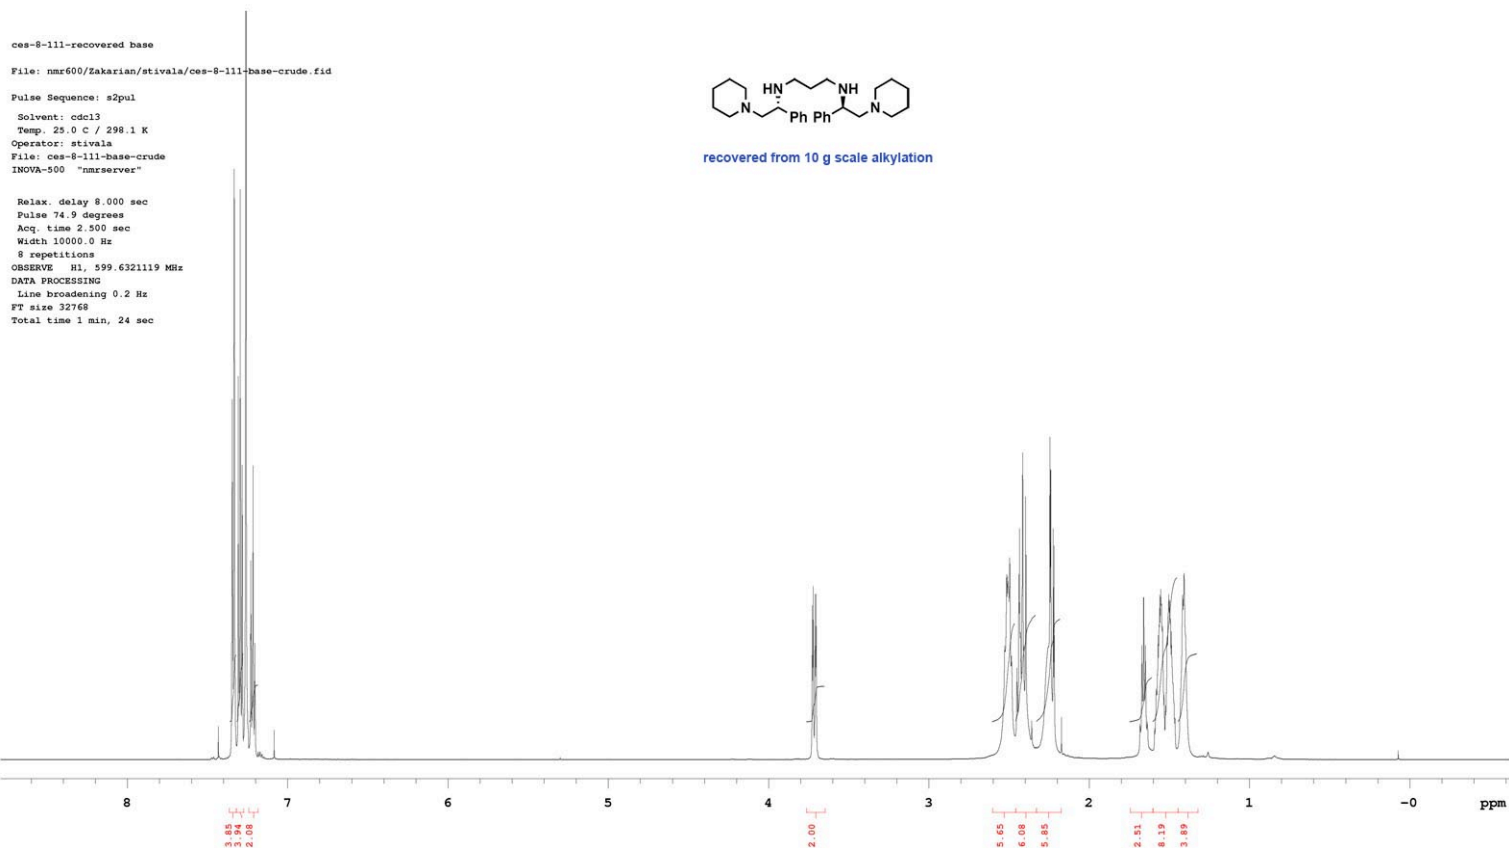

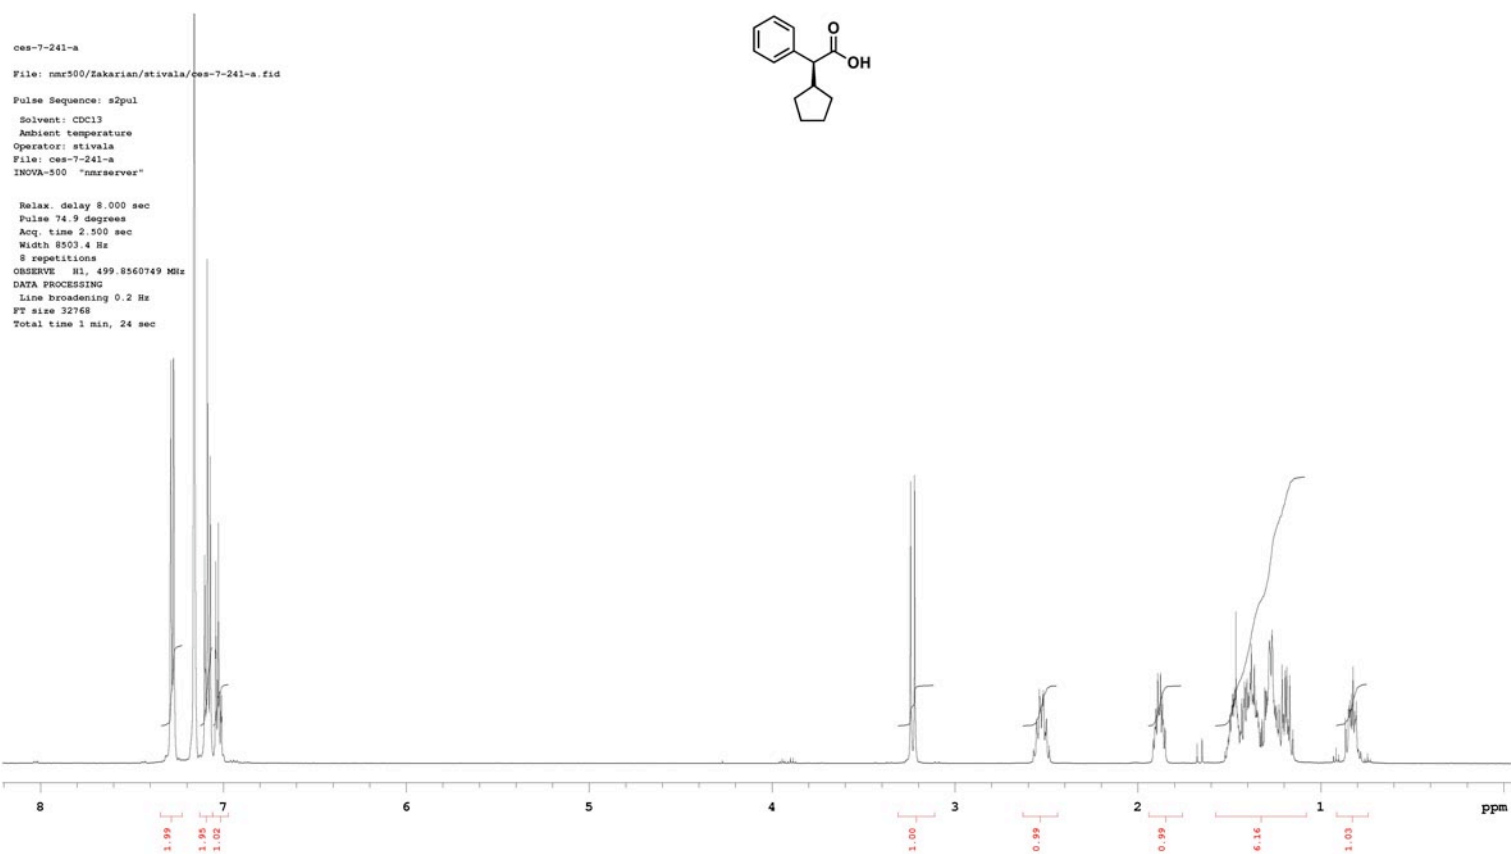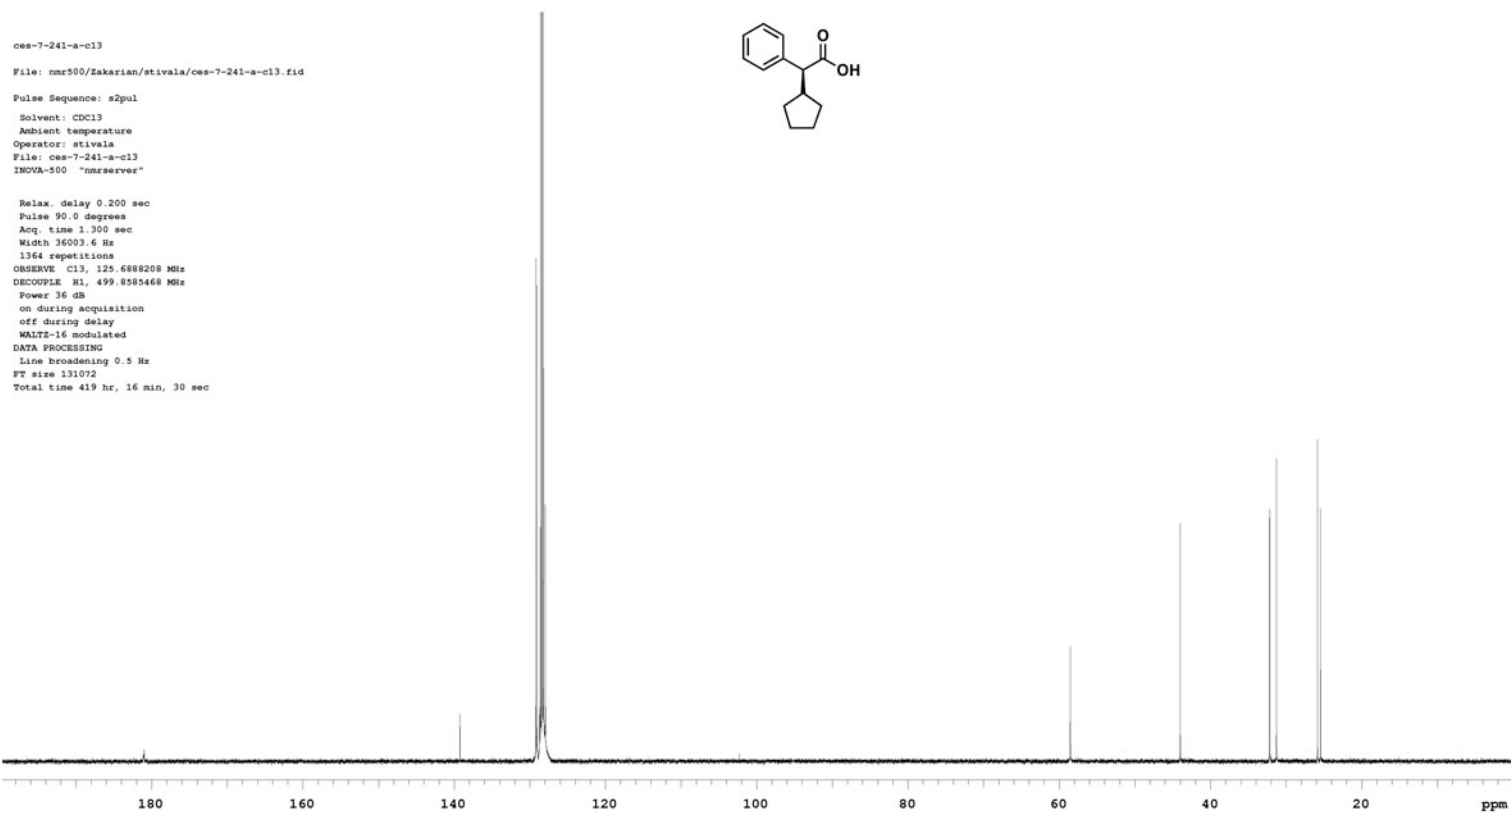

5/28/2011 17:11:11 1 / 1

## ==== Shimadzu LCsolution Analysis Report ====

C:\LabSolutions\Data\Project1\ces-7-242-02.lcd

Acquired by : Admin  
 Sample Name : ces-7-241  
 Sample ID : ces-7-241  
 Vial # :  
 Injection Volume : 20 uL  
 Data File Name : ces-7-241.lcd  
 Method File Name : ces-OD-H-analytical.lcm  
 Batch File Name :  
 Report File Name : Default.lcr  
 Data Acquired : 2/7/2011 5:58:25 PM  
 Data Processed : 2/7/2011 6:35:52 PM

### <Chromatogram>

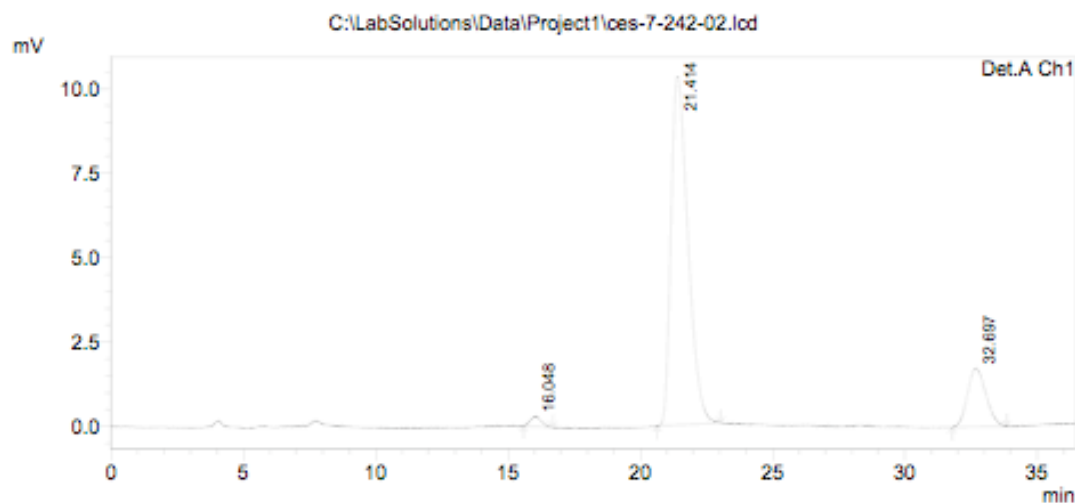

1 Det.A Ch1/215nm

PeakTable

Detector A Ch1 215nm

| Peak# | Ret. Time | Area   | Height | Area %  | Height % |
|-------|-----------|--------|--------|---------|----------|
| 1     | 16.048    | 8608   | 289    | 1.554   | 2.344    |
| 2     | 21.414    | 461439 | 10316  | 83.280  | 83.694   |
| 3     | 32.697    | 84031  | 1721   | 15.166  | 13.962   |
| Total |           | 554079 | 12326  | 100.000 | 100.000  |

C:\LabSolutions\Data\Project1\ces-7-242-02.lcd

5/27/2011 11:15:52 1 / 1

## ==== Shimadzu LCsolution Analysis Report ====

C:\LabSolutions\Data\Project1\ces-7-244-rac-02.lcd

Acquired by : Admin  
 Sample Name : ces-7-244-rac  
 Sample ID : ces-7-244-rac  
 Vial # :  
 Injection Volume : 20 uL  
 Data File Name : ces-7-244-rac-02.lcd  
 Method File Name : ces-OD-H-analytical.lcm  
 Batch File Name :  
 Report File Name : Default.lcr  
 Data Acquired : 2/7/2011 4:20:46 PM  
 Data Processed : 2/7/2011 5:56:18 PM

### <Chromatogram>

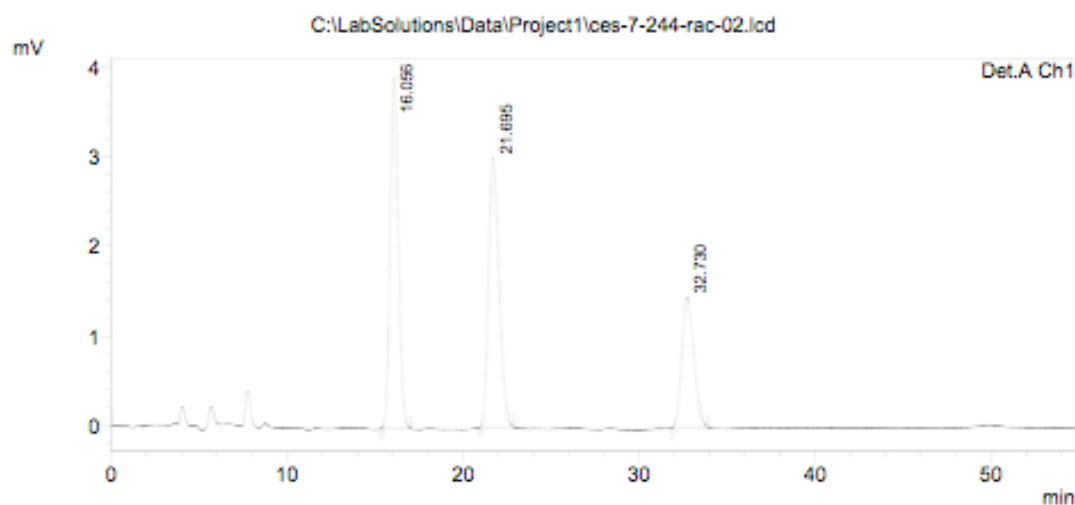

1 Det.A Ch1/215nm

PeakTable

Detector A Ch1 215nm

| Peak# | Ret. Time | Area   | Height | Area %  | Height % |
|-------|-----------|--------|--------|---------|----------|
| 1     | 16.056    | 127957 | 3907   | 39.330  | 46.680   |
| 2     | 21.695    | 127261 | 3008   | 39.117  | 35.942   |
| 3     | 32.730    | 70120  | 1455   | 21.553  | 17.378   |
| Total |           | 325338 | 8370   | 100.000 | 100.000  |

C:\LabSolutions\Data\Project1\ces-7-244-rac-02.lcd

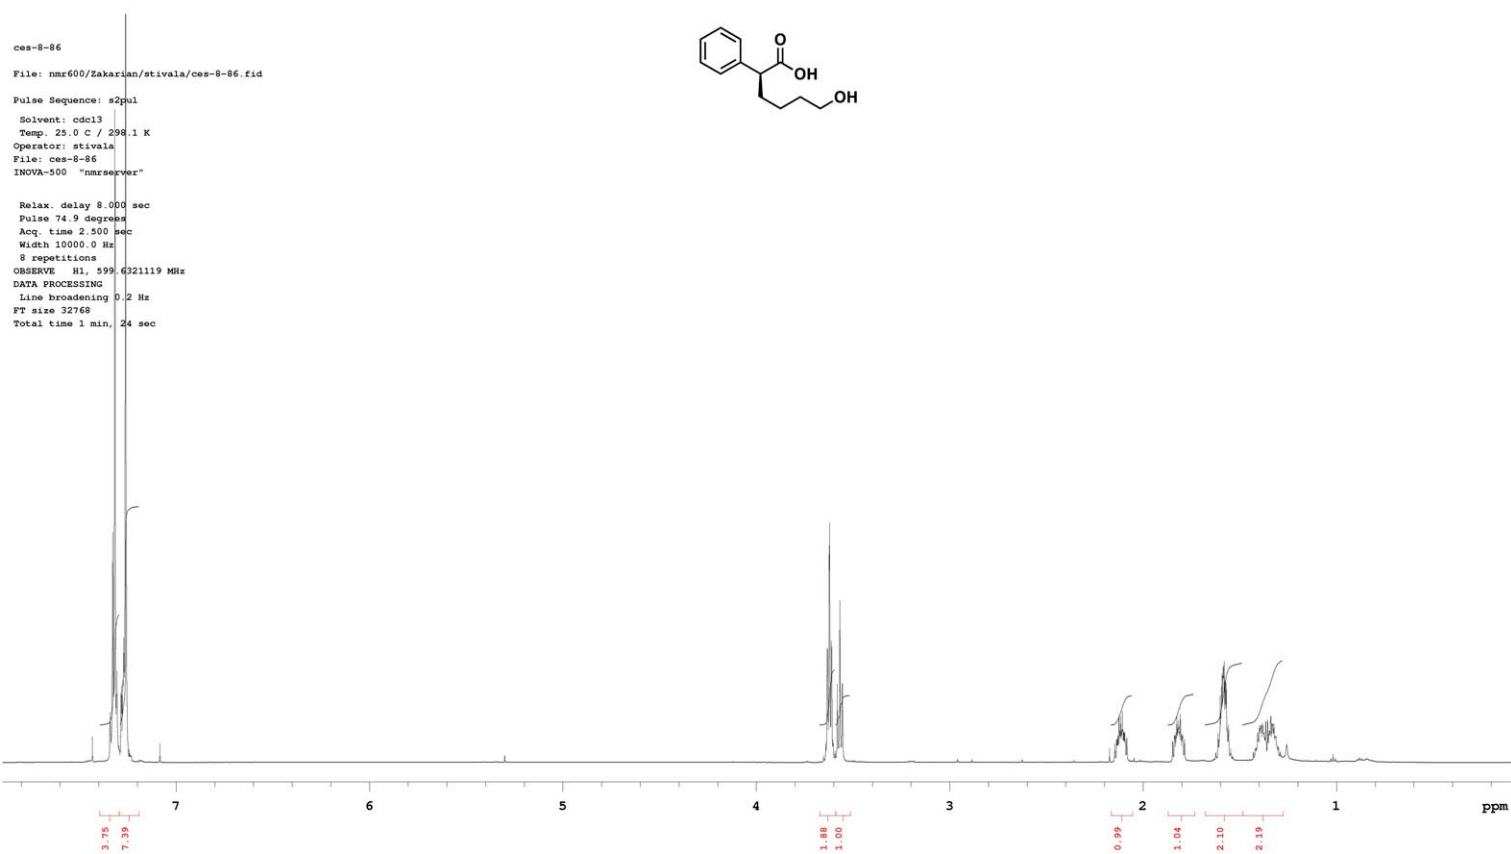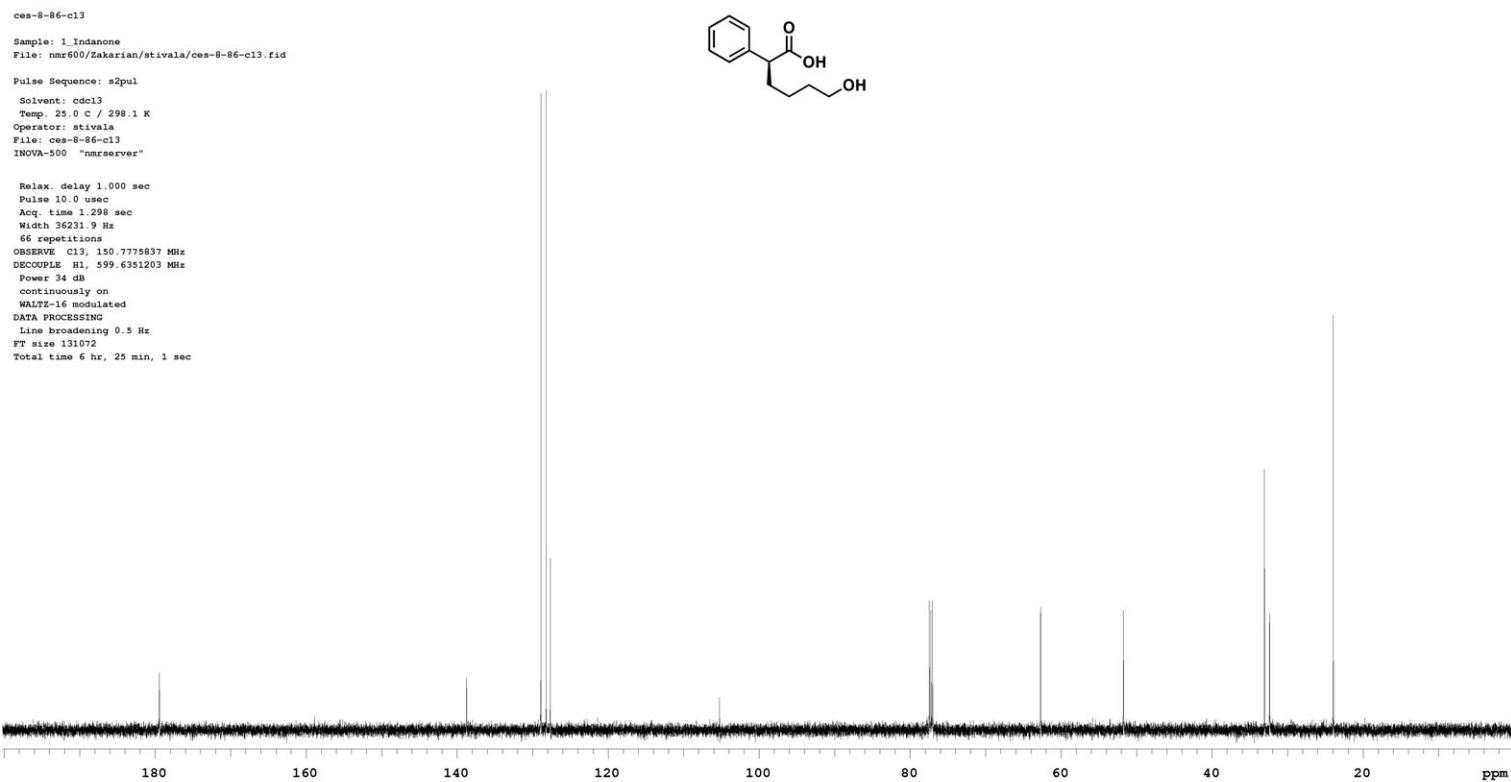



5/27/2011 09:50:31 1 / 1

## ==== Shimadzu LCsolution Analysis Report ====

C:\LabSolutions\Data\Project1\ces-8-86.lcd

Acquired by : Admin  
 Sample Name : ces-8-86  
 Sample ID : ces-8-86  
 Vial # :  
 Injection Volume : 20 uL  
 Data File Name : ces-8-86.lcd  
 Method File Name : ces-OD-H-analytical 0.46cm x 25cm.lcm  
 Batch File Name :  
 Report File Name : Default.lcr  
 Data Acquired : 4/26/2011 10:04:46 PM  
 Data Processed : 4/26/2011 10:39:22 PM

### <Chromatogram>

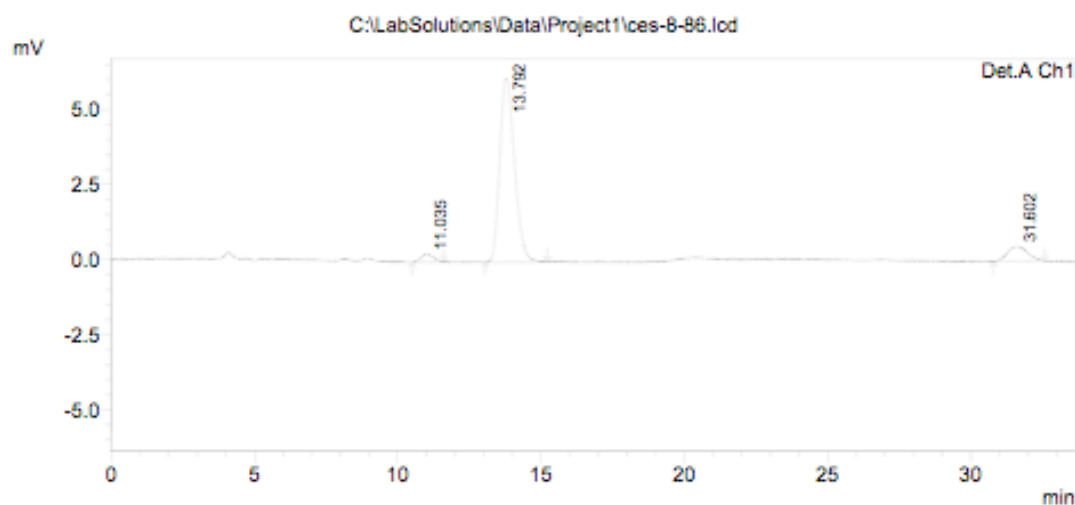

1 Det.A Ch1/215nm

PeakTable

| Peak# | Ret. Time | Area   | Height | Area %  | Height % |
|-------|-----------|--------|--------|---------|----------|
| 1     | 11.035    | 7937   | 261    | 3.171   | 3.798    |
| 2     | 13.792    | 218342 | 6127   | 87.242  | 89.030   |
| 3     | 31.602    | 23993  | 494    | 9.587   | 7.171    |
| Total |           | 250272 | 6882   | 100.000 | 100.000  |

C:\LabSolutions\Data\Project1\ces-8-86.lcd

5/27/2011 13:25:25 1 / 1

## ==== Shimadzu LCsolution Analysis Report ====

C:\LabSolutions\Data\Project1\ces-8-64-02.lcd

Acquired by : Admin  
 Sample Name : ces-8-64-2  
 Sample ID : ces-8-64-2  
 Vial # :  
 Injection Volume : 25 uL  
 Data File Name : ces-8-64-02.lcd  
 Method File Name : ces-OD-H-analytical 0.46cm x 25cm.lcm  
 Batch File Name :  
 Report File Name : Default.lcr  
 Data Acquired : 5/27/2011 12:58:04 PM  
 Data Processed : 5/27/2011 1:23:04 PM

### <Chromatogram>

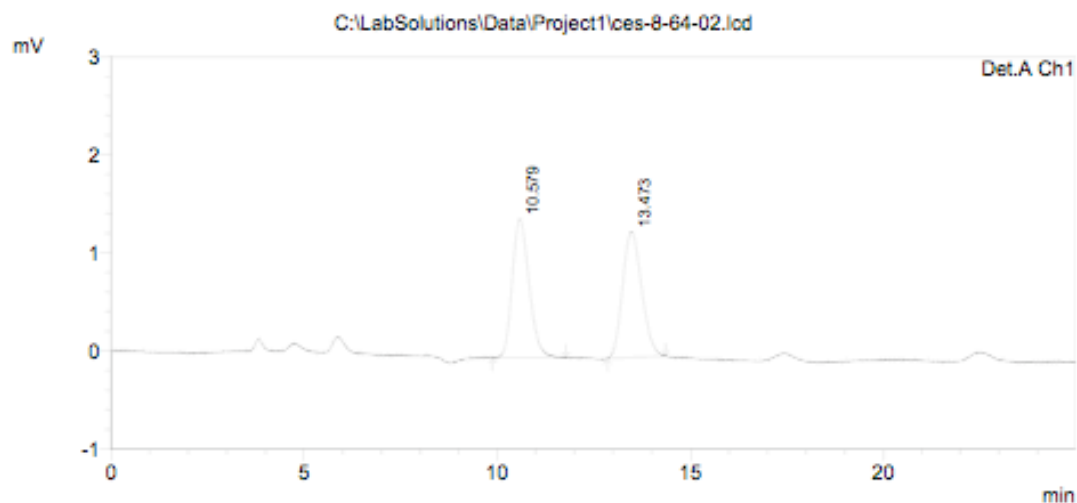

PeakTable

Detector A Ch1 215nm

| Peak# | Ret. Time | Area  | Height | Area %  | Height % |
|-------|-----------|-------|--------|---------|----------|
| 1     | 10.579    | 43020 | 1412   | 49.429  | 52.423   |
| 2     | 13.473    | 44013 | 1281   | 50.571  | 47.577   |
| Total |           | 87033 | 2693   | 100.000 | 100.000  |

C:\LabSolutions\Data\Project1\ces-8-64-02.lcd

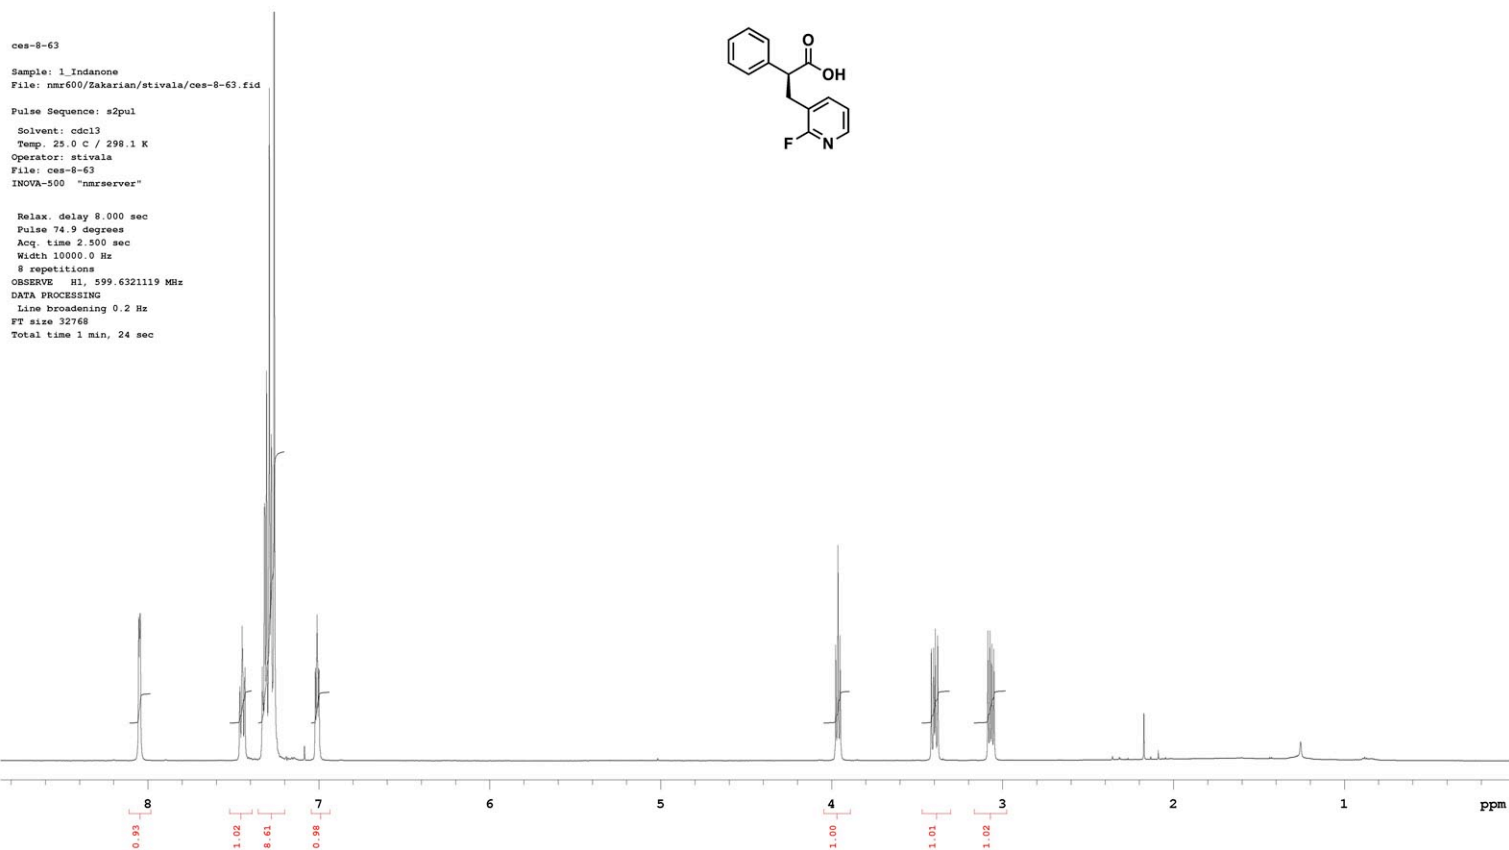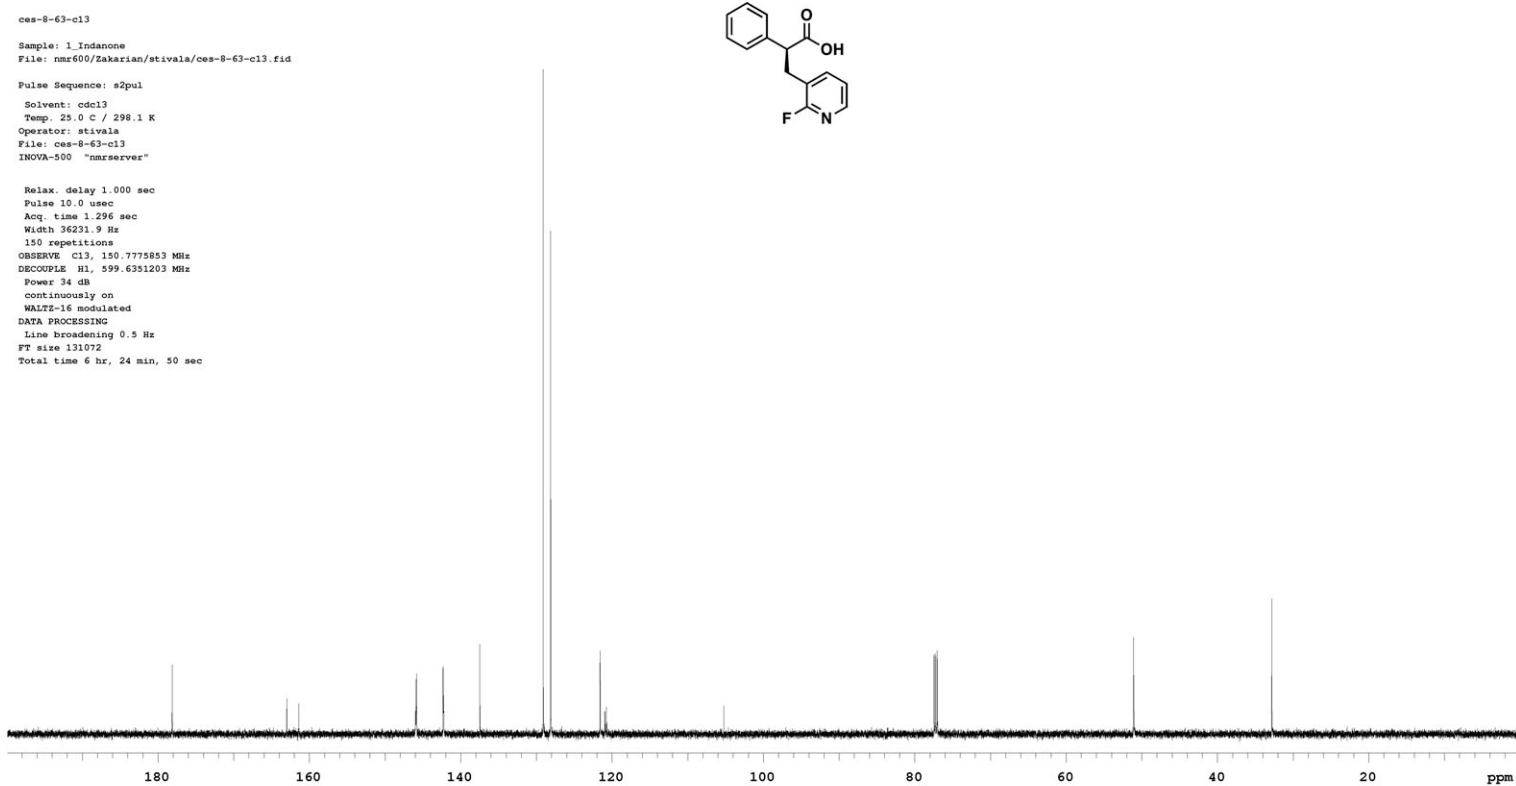

5/27/2011 09:52:29 1 / 1

## ==== Shimadzu LCsolution Analysis Report ====

C:\LabSolutions\Data\Project1\ces-8-63.lcd

Acquired by : Admin  
 Sample Name : ces-8-63  
 Sample ID : ces-8-63  
 Vial # :  
 Injection Volume : 20 uL  
 Data File Name : ces-8-63.lcd  
 Method File Name : ces-OD-H-analytical 0.46cm x 25cm.lcm  
 Batch File Name :  
 Report File Name : Default.lcr  
 Data Acquired : 4/15/2011 5:43:40 PM  
 Data Processed : 4/15/2011 6:04:08 PM

### <Chromatogram>

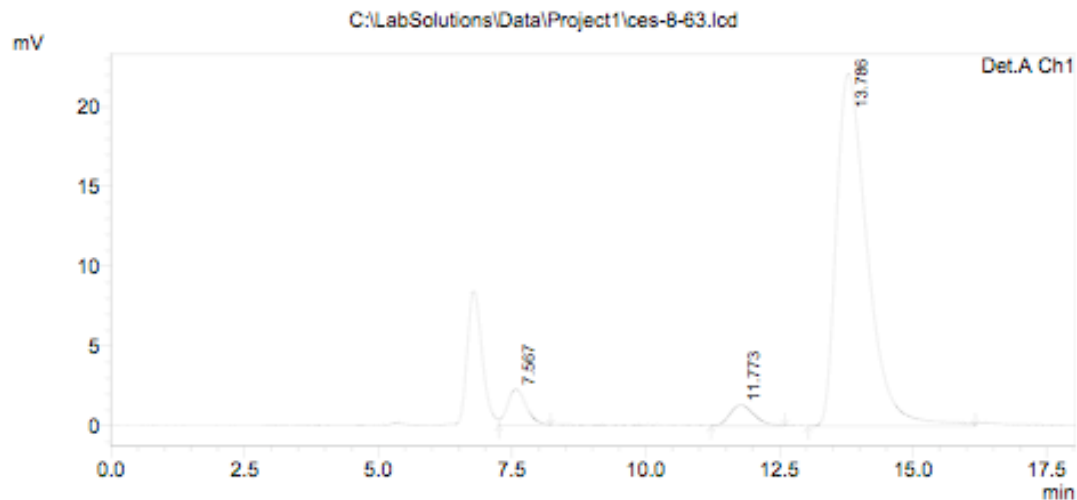

PeakTable

Detector A Ch1 215nm

| Peak# | Ret. Time | Area   | Height | Area %  | Height % |
|-------|-----------|--------|--------|---------|----------|
| 1     | 7.567     | 56504  | 2278   | 5.722   | 8.870    |
| 2     | 11.773    | 40124  | 1297   | 4.063   | 5.053    |
| 3     | 13.786    | 890940 | 22103  | 90.216  | 86.077   |
| Total |           | 987568 | 25678  | 100.000 | 100.000  |

C:\LabSolutions\Data\Project1\ces-8-63.lcd

5/27/2011 11:42:23 1 / 1

## ==== Shimadzu LCsolution Analysis Report ====

C:\LabSolutions\Data\Project1\ces-8-59-04.lcd

Acquired by : Admin  
 Sample Name : ces-8-59  
 Sample ID : ces-8-59  
 Vial # :  
 Injection Volume : 20 uL  
 Data File Name : ces-8-59-04.lcd  
 Method File Name : ces-OD-H-analytical 0.46cm x 25cm.lcm  
 Batch File Name :  
 Report File Name : Default.lcr  
 Data Acquired : 4/14/2011 8:48:08 PM  
 Data Processed : 4/14/2011 9:28:16 PM

### <Chromatogram>

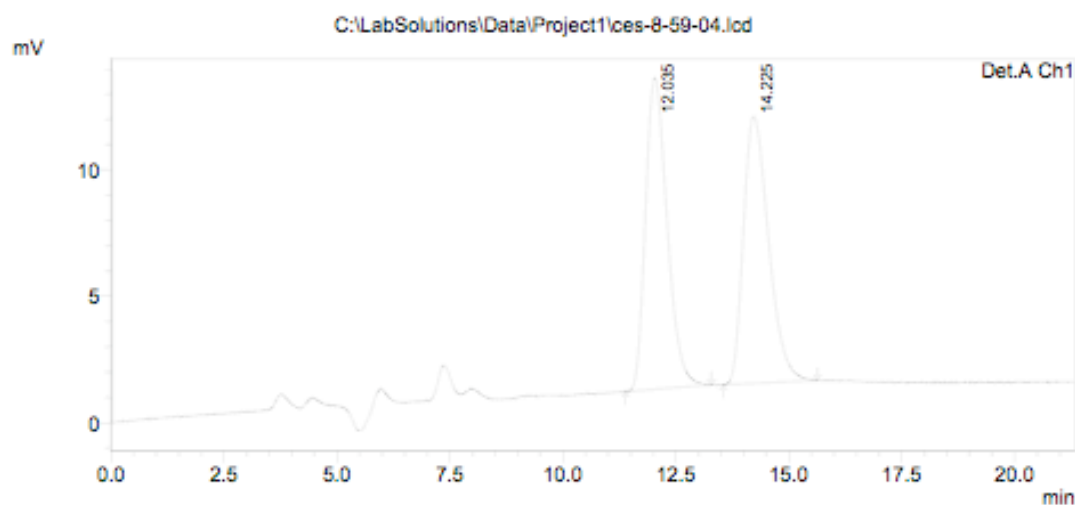

1 Det.A Ch1/215nm

PeakTable

Detector A Ch1 215nm

| Peak# | Ret. Time | Area   | Height | Area %  | Height % |
|-------|-----------|--------|--------|---------|----------|
| 1     | 12.035    | 410580 | 12302  | 50.062  | 53.788   |
| 2     | 14.225    | 409568 | 10569  | 49.938  | 46.212   |
| Total |           | 820149 | 22870  | 100.000 | 100.000  |

C:\LabSolutions\Data\Project1\ces-8-59-04.lcd

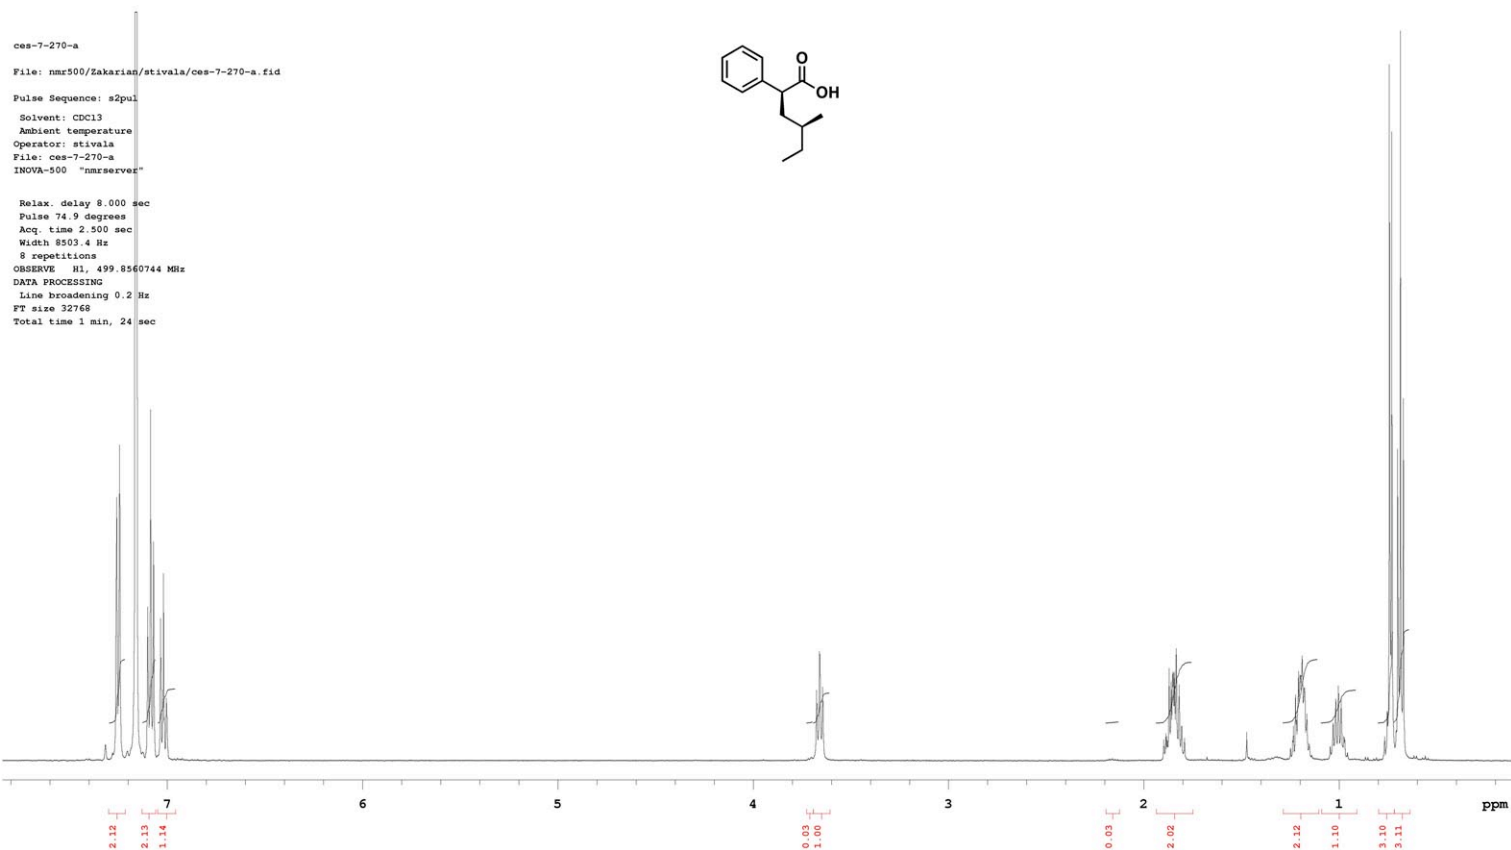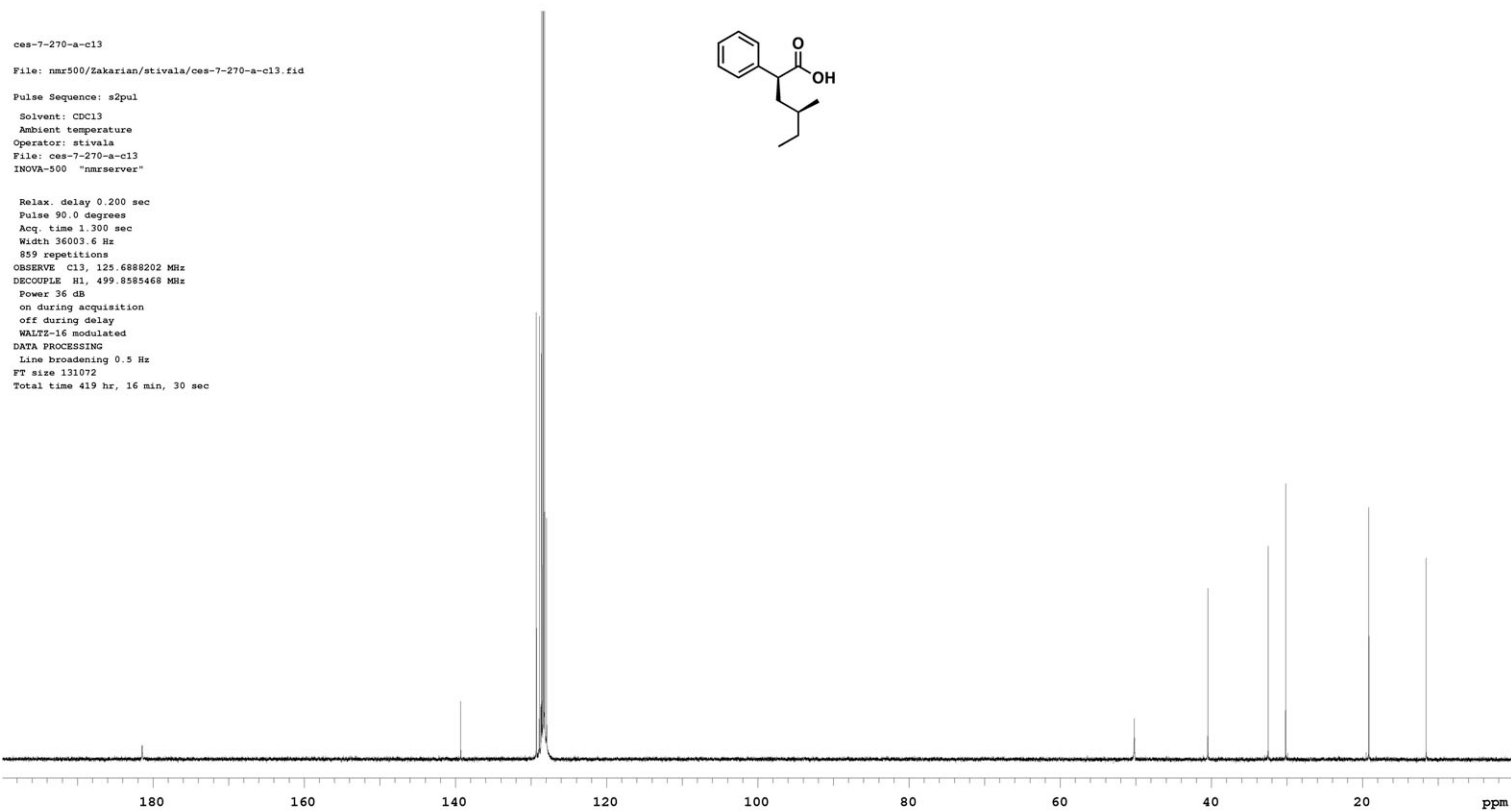

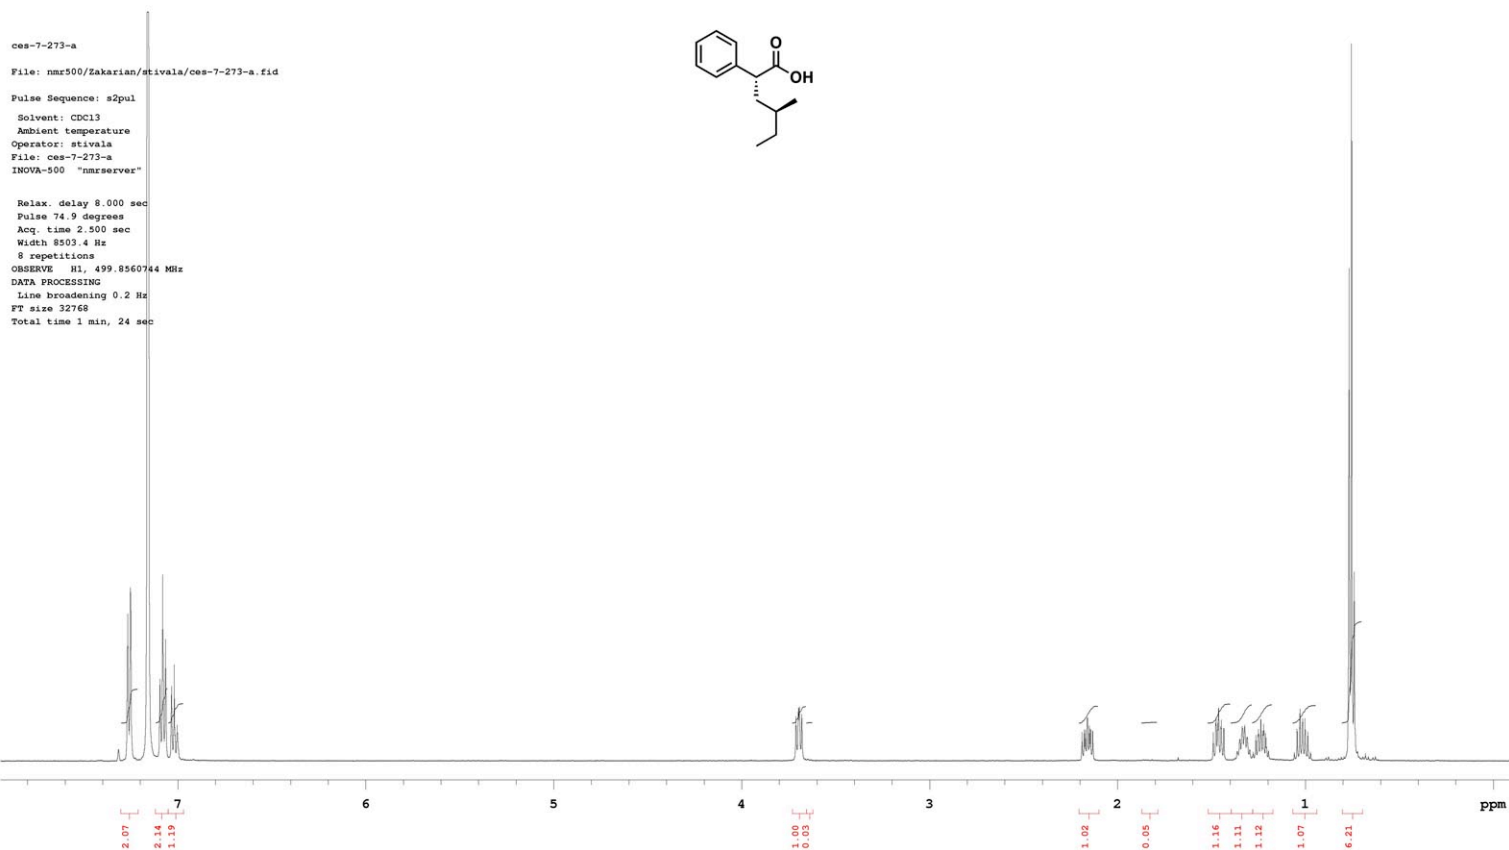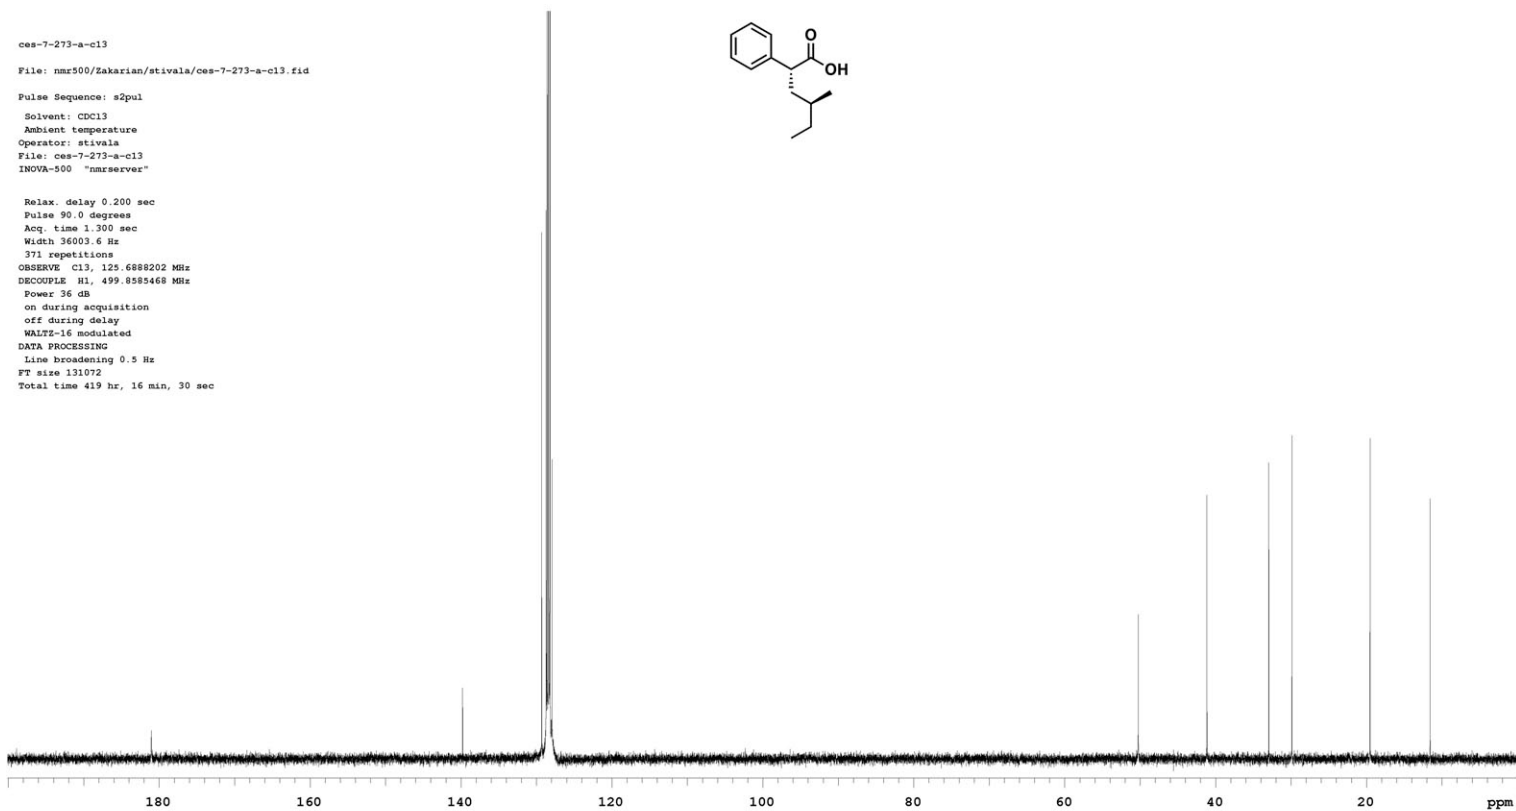

ces-7-260-a  
 File: nmr500/Zakarian/stivala/ces-7-260-a.fid  
 Pulse Sequence: s2pul  
 Solvent: CDCl3  
 Ambient temperature  
 Operator: stivala  
 File: ces-7-260-a  
 INOVA-500 "nmrserver"

Relax. delay 8.000 sec  
 Pulse 74.9 degrees  
 Acq. time 2.500 sec  
 Width 8503.4 Hz  
 8 repetitions  
 OBSERVE H1, 499.8560744 MHz  
 DATA PROCESSING  
 Line Broadening 0.2 Hz  
 FT size 32768  
 Total time 1 min, 24 sec

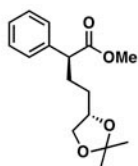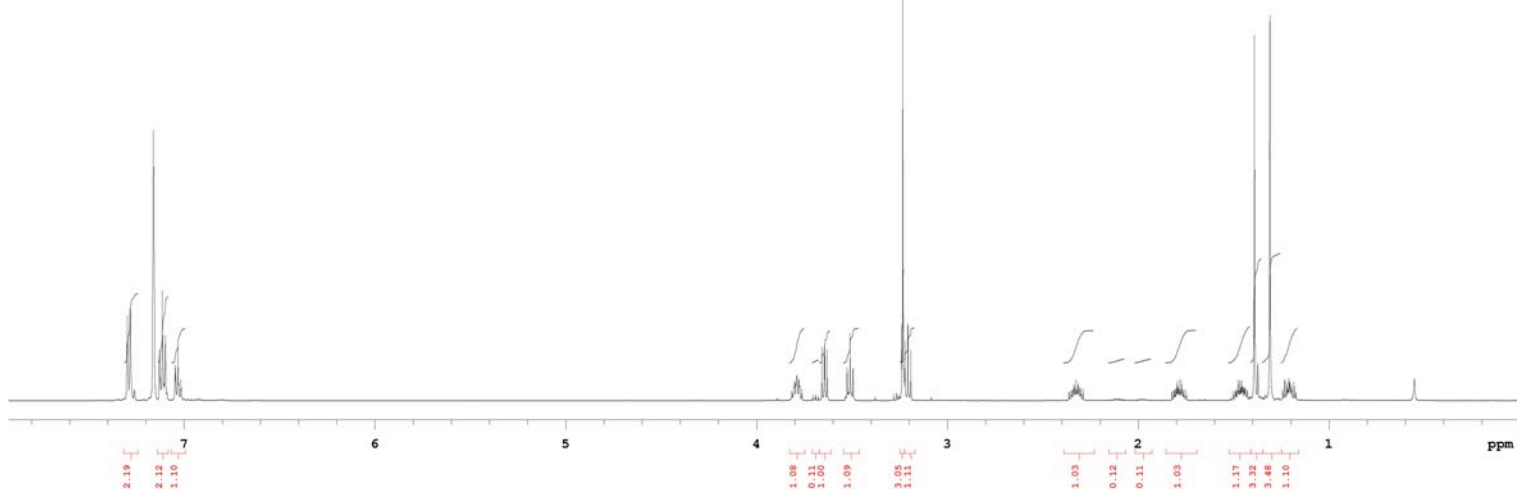

ces-7-260-a-c13  
 File: nmr500/Zakarian/stivala/ces-7-260-a-c13.fid  
 Pulse Sequence: s2pul  
 Solvent: CDCl3  
 Ambient temperature  
 Operator: stivala  
 File: ces-7-260-a-c13  
 INOVA-500 "nmrserver"

Relax. delay 0.200 sec  
 Pulse 90.0 degrees  
 Acq. time 1.300 sec  
 Width 36003.6 Hz  
 748 repetitions  
 OBSERVE C13, 125.6888208 MHz  
 DECOUPLE H1, 499.856468 MHz  
 Power 36 dB  
 on during acquisition  
 off during delay  
 WALTZ-16 modulated  
 DATA PROCESSING  
 Line Broadening 0.5 Hz  
 FT size 131072  
 Total time 419 hr, 16 min, 30 sec

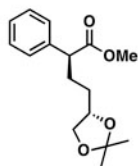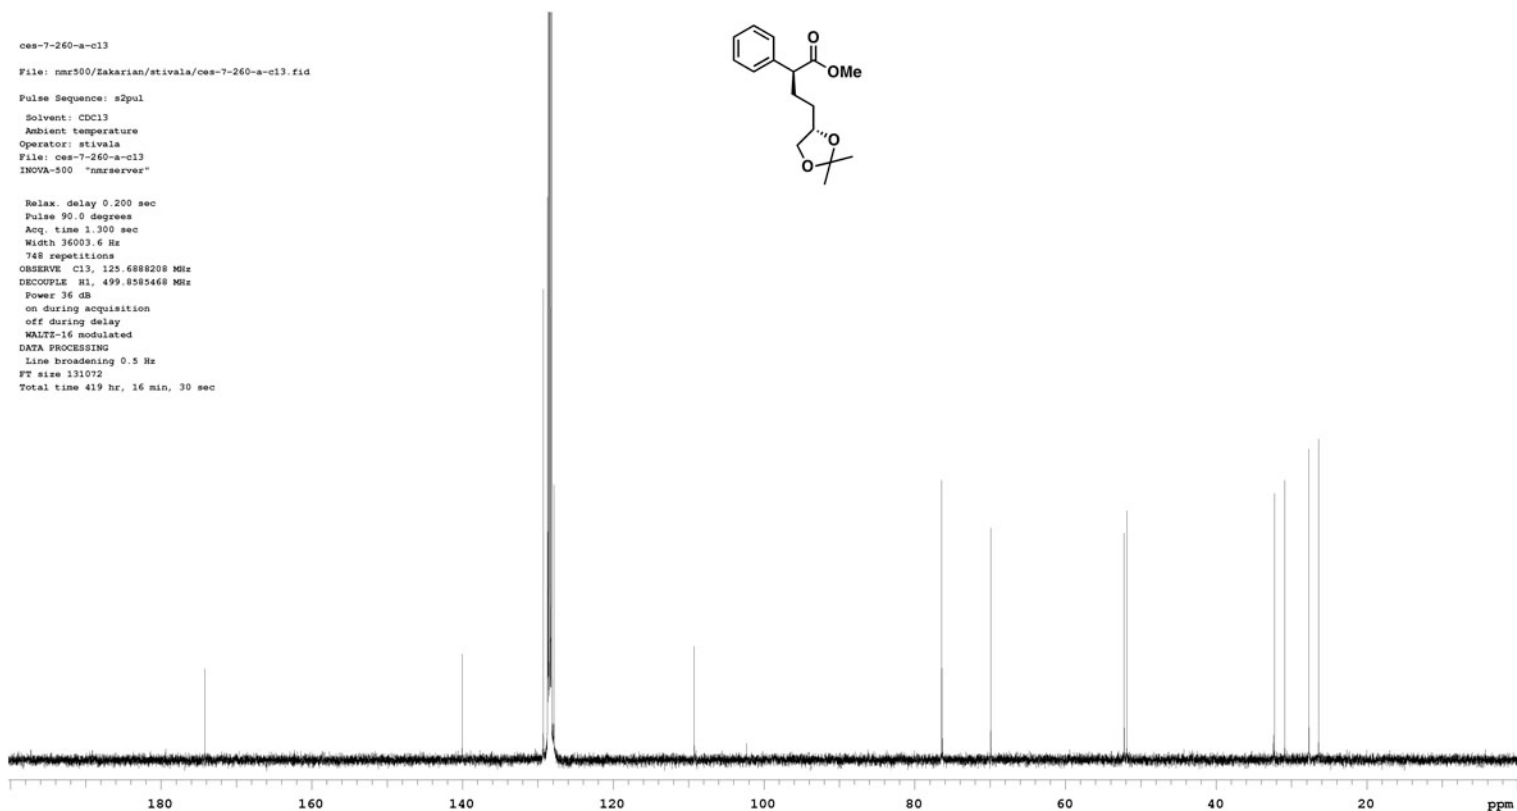



ces-8-13  
 File: nmr500/Zakarian/stivala/ces-8-13.fid  
 Pulse Sequence: s2pul  
 Solvent: CDCl3  
 Ambient temperature  
 Operator: stivala  
 File: ces-8-13  
 INOVA-500 "nmrserver"

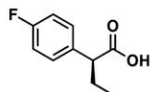

Relax. delay 8.000 sec  
 Pulse 74.9 degrees  
 Acq. time 2.500 sec  
 Width 8503.4 Hz  
 8 repetitions  
 OBSERVE H1, 499.8560744 MHz  
 DATA PROCESSING  
 Line broadening 0.2 Hz  
 FT size 32768  
 Total time 1 min, 24 sec

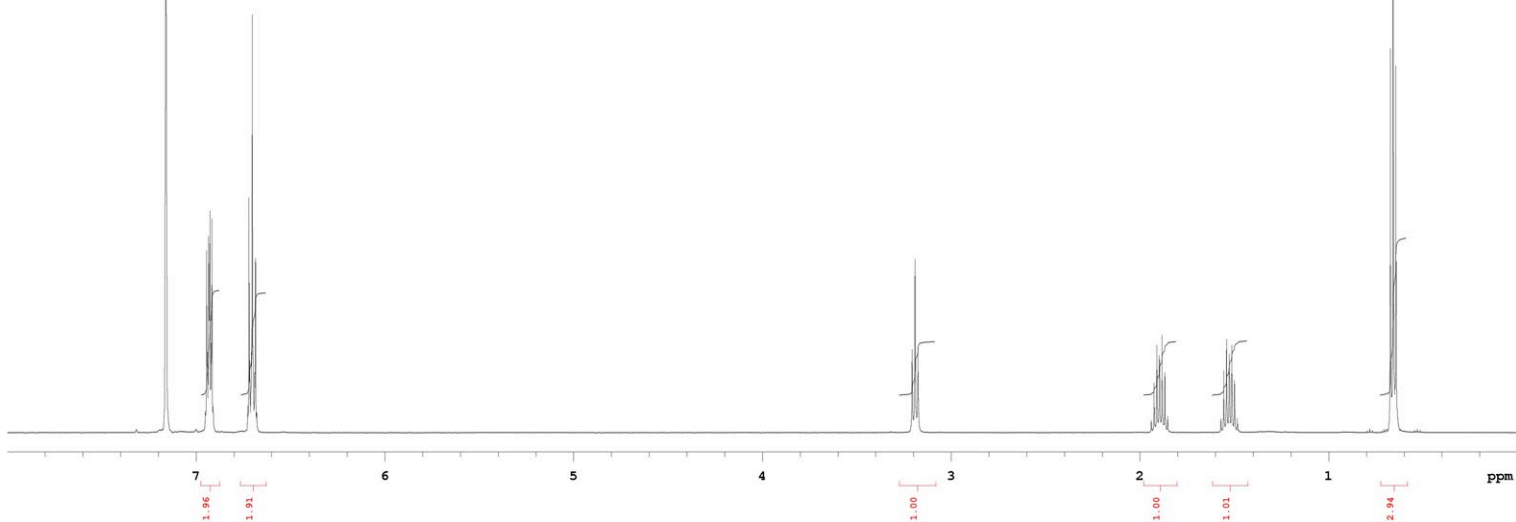

ces-8-13-cl3  
 File: nmr500/Zakarian/stivala/ces-8-13-cl3.fid  
 Pulse Sequence: s2pul  
 Solvent: CDCl3  
 Ambient temperature  
 Operator: stivala  
 File: ces-8-13-cl3  
 INOVA-500 "nmrserver"

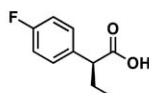

Relax. delay 0.200 sec  
 Pulse 90.0 degrees  
 Acq. time 1.300 sec  
 Width 36003.6 Hz  
 1428 repetitions  
 OBSERVE C13, 125.688202 MHz  
 DECOUPLE H1, 499.8563468 MHz  
 Power 36 dB  
 on during acquisition  
 off during delay  
 WALTZ-16 modulated  
 DATA PROCESSING  
 Line broadening 0.5 Hz  
 FT size 131072  
 Total time 419 hr, 16 min, 30 sec

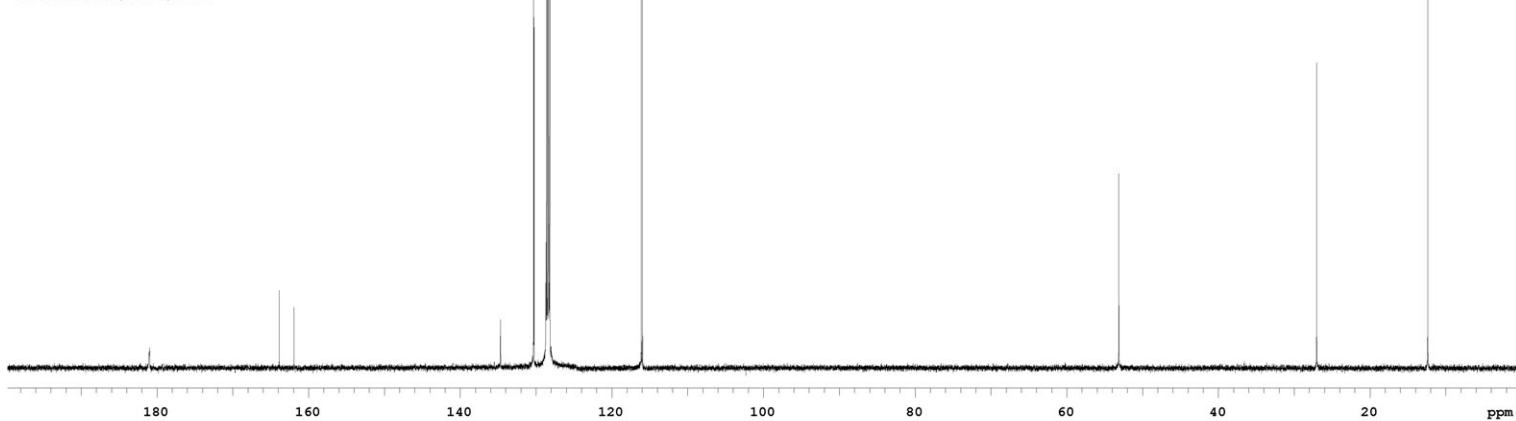

5/27/2011 09:56:20 1 / 1

## ==== Shimadzu LCsolution Analysis Report ====

C:\LabSolutions\Data\Project1\ces-8-13.lcd

Acquired by : Admin  
 Sample Name : ces-8-13  
 Sample ID : ces-8-13  
 Vial # :  
 Injection Volume : 20 uL  
 Data File Name : ces-8-13.lcd  
 Method File Name : ces-OJ-H-analytical.lcm  
 Batch File Name :  
 Report File Name : Default.lcr  
 Data Acquired : 3/28/2011 7:28:00 PM  
 Data Processed : 3/28/2011 8:27:35 PM

### <Chromatogram>

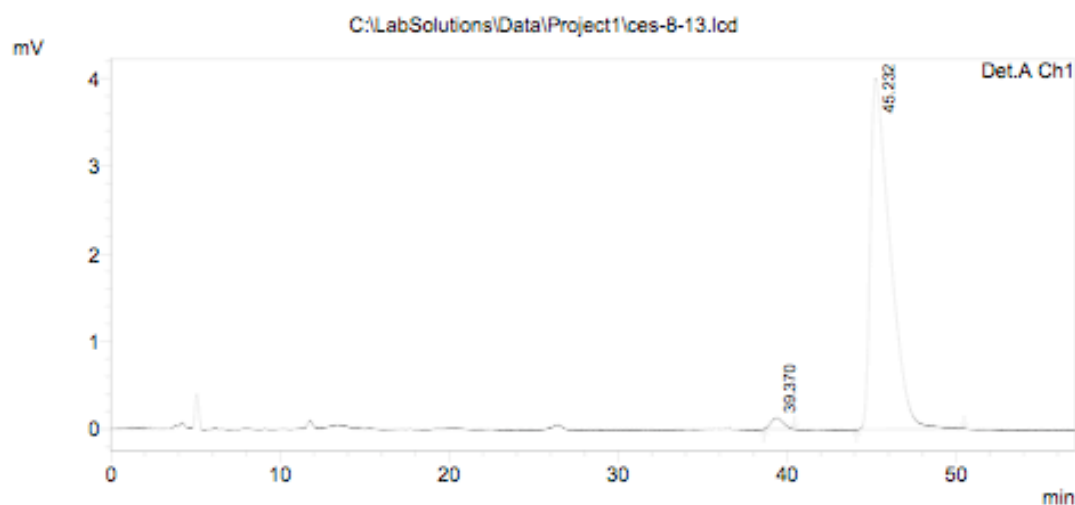

PeakTable

Detector A Ch1 215nm

| Peak# | Ret. Time | Area   | Height | Area %  | Height % |
|-------|-----------|--------|--------|---------|----------|
| 1     | 39.370    | 6632   | 134    | 2.002   | 3.240    |
| 2     | 45.232    | 324644 | 4005   | 97.998  | 96.760   |
| Total |           | 331276 | 4139   | 100.000 | 100.000  |

C:\LabSolutions\Data\Project1\ces-8-13.lcd

5/27/2011 11:44:26 1 / 1

## ==== Shimadzu LCsolution Analysis Report ====

C:\LabSolutions\Data\Project1\ces-8-15.lcd

Acquired by : Admin  
 Sample Name : ces-8-15  
 Sample ID : ces-8-15  
 Vial # :  
 Injection Volume : 10 uL  
 Data File Name : ces-8-15.lcd  
 Method File Name : ces-OD-H-analytical.lcm  
 Batch File Name :  
 Report File Name : Default.lcr  
 Data Acquired : 3/28/2011 8:32:15 PM  
 Data Processed : 3/28/2011 8:25:19 PM

### <Chromatogram>

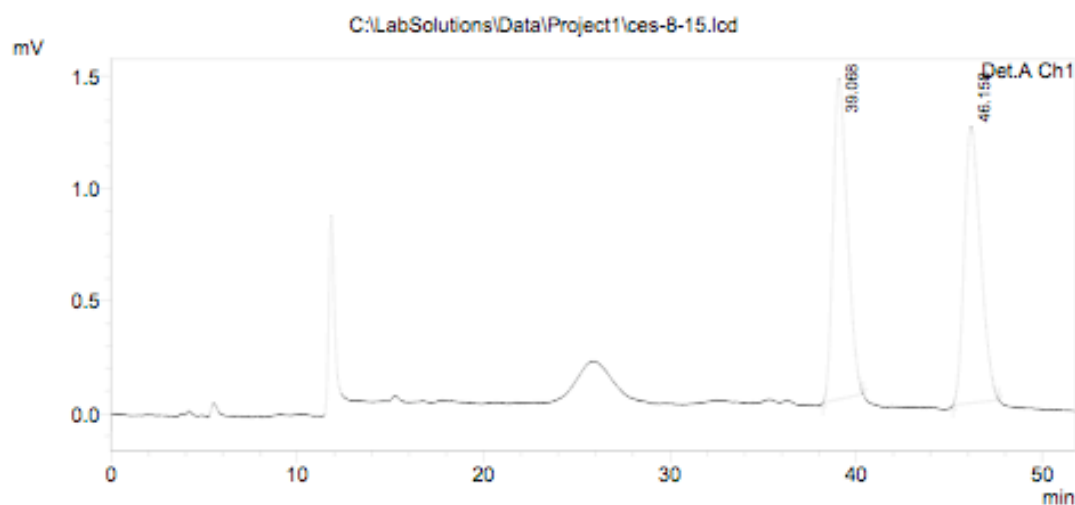

1 Det.A Ch1/215nm

PeakTable

Detector A Ch1 215nm

| Peak# | Ret. Time | Area   | Height | Area %  | Height % |
|-------|-----------|--------|--------|---------|----------|
| 1     | 39.068    | 76061  | 1427   | 50.100  | 53.650   |
| 2     | 46.158    | 75756  | 1233   | 49.900  | 46.350   |
| Total |           | 151817 | 2661   | 100.000 | 100.000  |

C:\LabSolutions\Data\Project1\ces-8-15.lcd

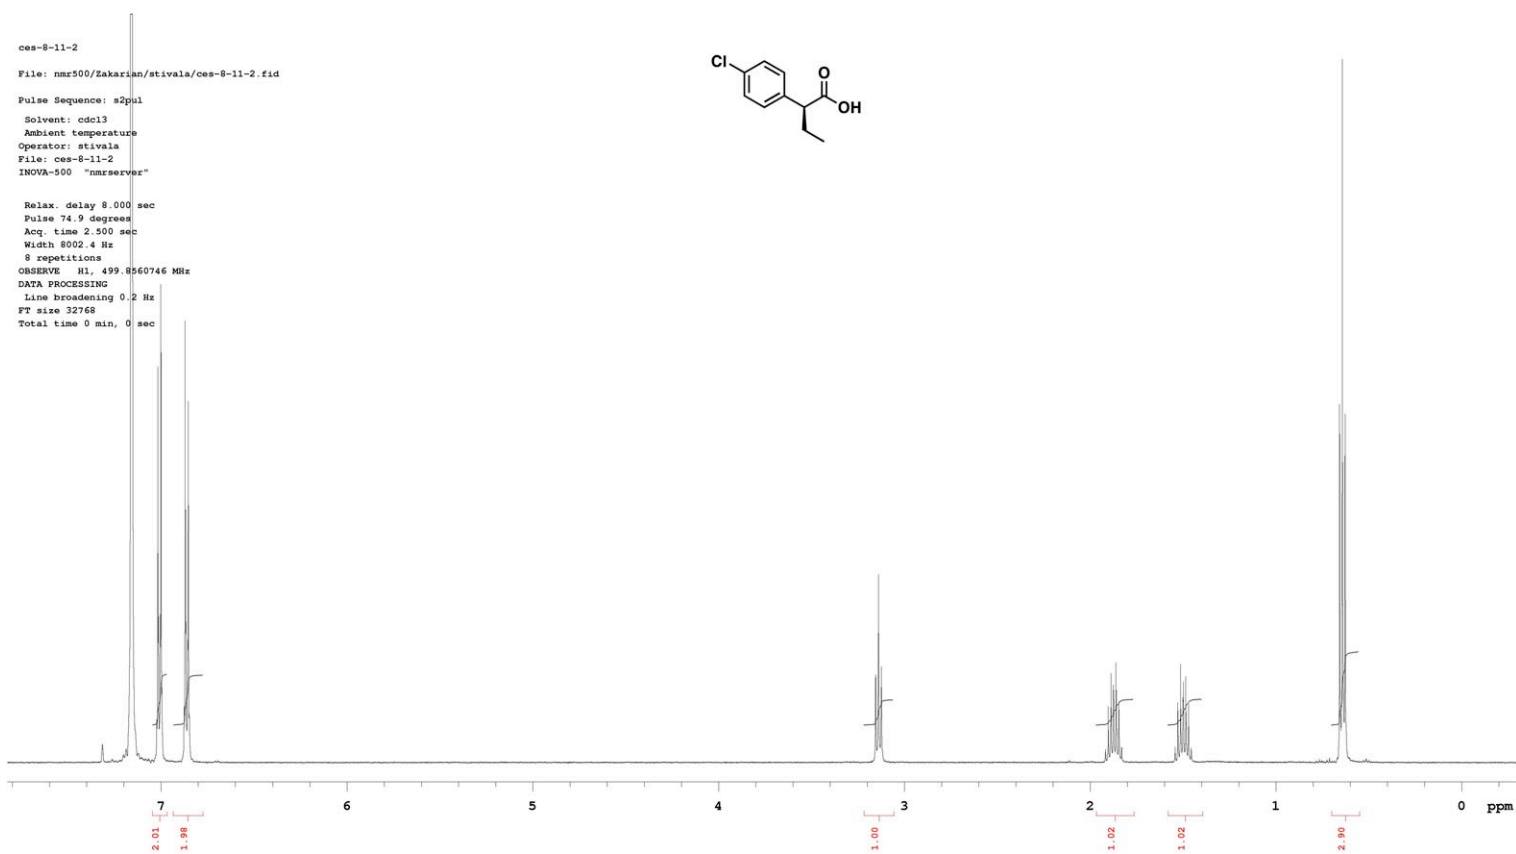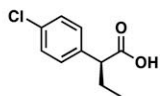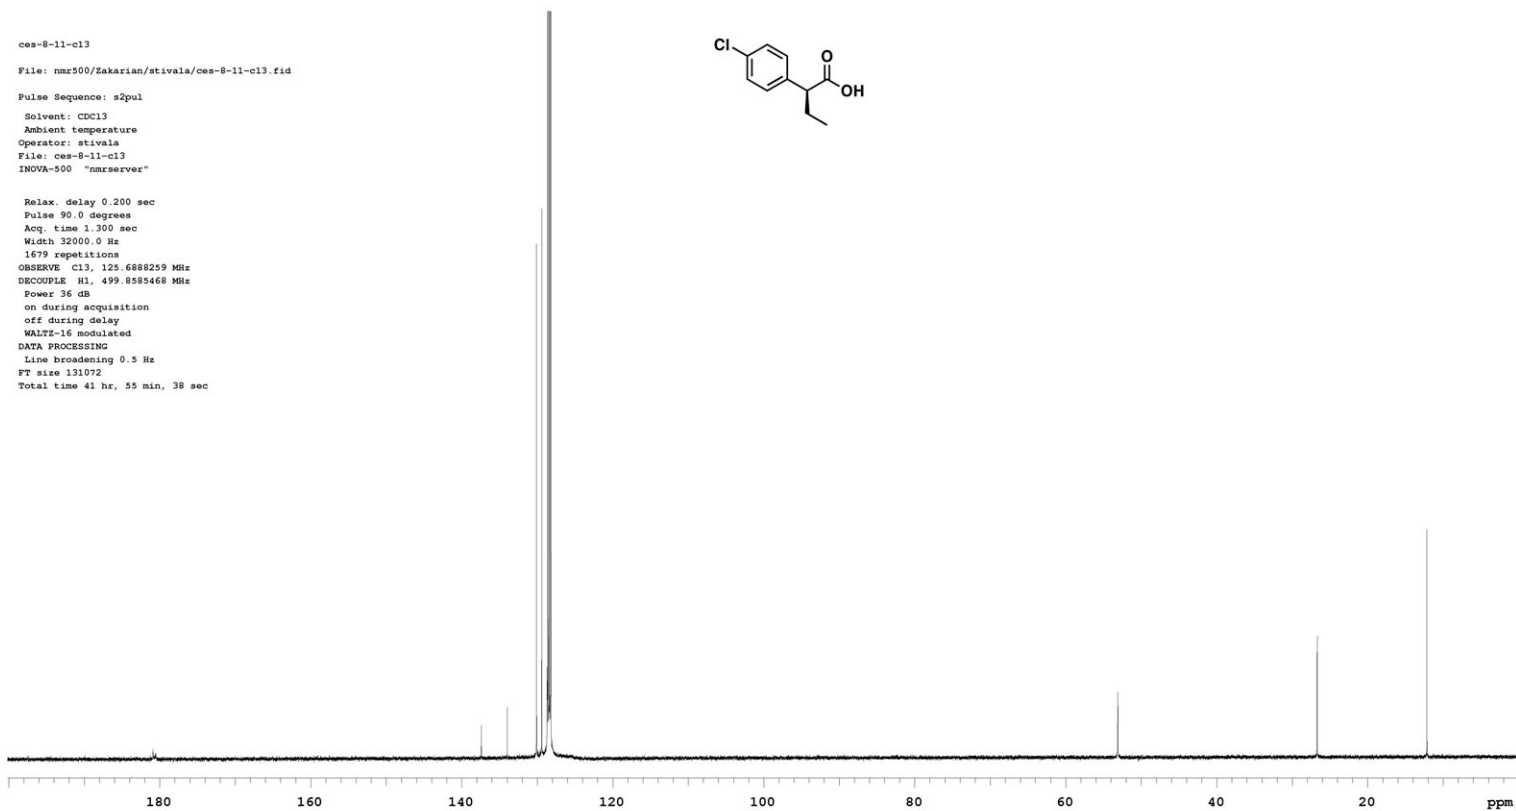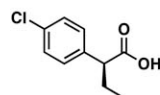

5/27/2011 09:57:49 1 / 1

## ==== Shimadzu LCsolution Analysis Report ====

C:\LabSolutions\Data\Project1\ces-8-11.lcd

Acquired by : Admin  
 Sample Name : ces-8-11  
 Sample ID : ces-8-11  
 Vial # :  
 Injection Volume : 10 uL  
 Data File Name : ces-8-11.lcd  
 Method File Name : ces-OJ-H-analytical.lcm  
 Batch File Name :  
 Report File Name : Default.lcr  
 Data Acquired : 3/28/2011 11:46:49 AM  
 Data Processed : 3/28/2011 1:25:23 PM

### <Chromatogram>

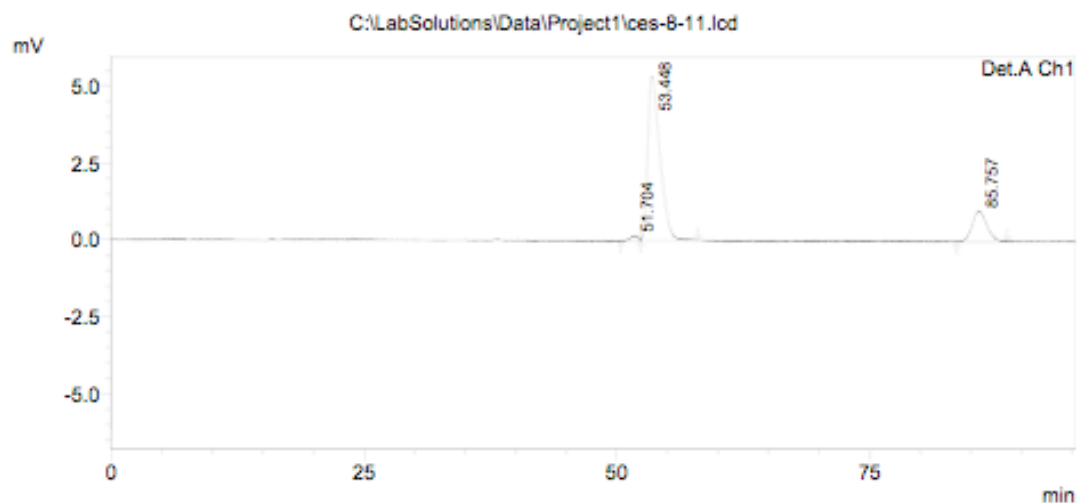

1 Det.A Ch1/215nm

PeakTable

Detector A Ch1 215nm

| Peak# | Ret. Time | Area   | Height | Area %  | Height % |
|-------|-----------|--------|--------|---------|----------|
| 1     | 51.704    | 8506   | 156    | 1.544   | 2.405    |
| 2     | 53.448    | 442522 | 5334   | 80.319  | 82.470   |
| 3     | 85.757    | 99924  | 978    | 18.137  | 15.125   |
| Total |           | 550953 | 6468   | 100.000 | 100.000  |

C:\LabSolutions\Data\Project1\ces-8-11.lcd

5/27/2011 11:43:35 1 / 1

## ==== Shimadzu LCsolution Analysis Report ====

C:\LabSolutions\Data\Project1\ces-8-06-03.lcd

Acquired by : Admin  
 Sample Name : ces-8-6  
 Sample ID : ces-8-6  
 Vial # :  
 Injection Volume : 20 uL  
 Data File Name : ces-8-06-03.lcd  
 Method File Name : ces-OD-H-analytical.lcm  
 Batch File Name :  
 Report File Name : Default.lcr  
 Data Acquired : 3/26/2011 10:17:25 AM  
 Data Processed : 3/26/2011 12:17:45 PM

### <Chromatogram>

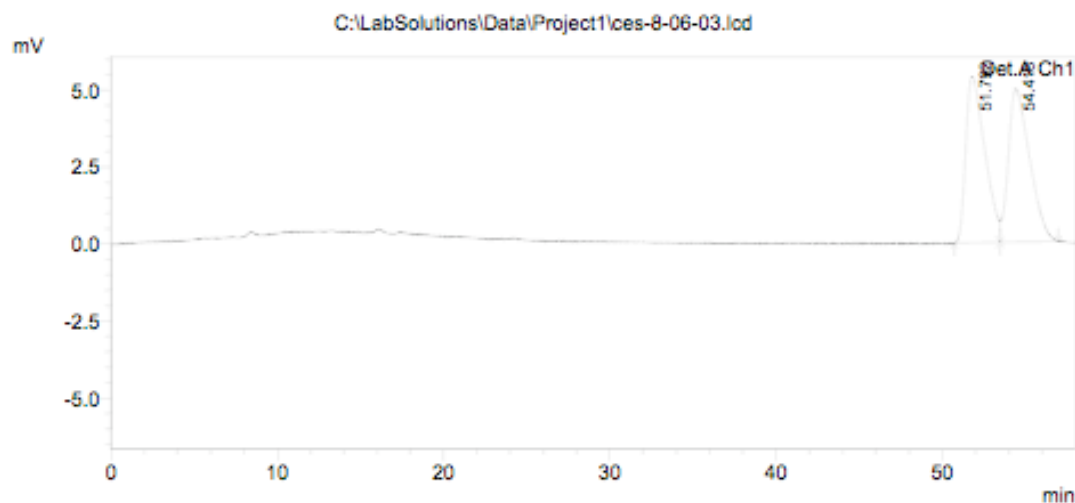

PeakTable

| Peak# | Ret. Time | Area   | Height | Area %  | Height % |
|-------|-----------|--------|--------|---------|----------|
| 1     | 51.792    | 431493 | 5409   | 49.315  | 52.099   |
| 2     | 54.418    | 443478 | 4973   | 50.685  | 47.901   |
| Total |           | 874971 | 10382  | 100.000 | 100.000  |

C:\LabSolutions\Data\Project1\ces-8-06-03.lcd

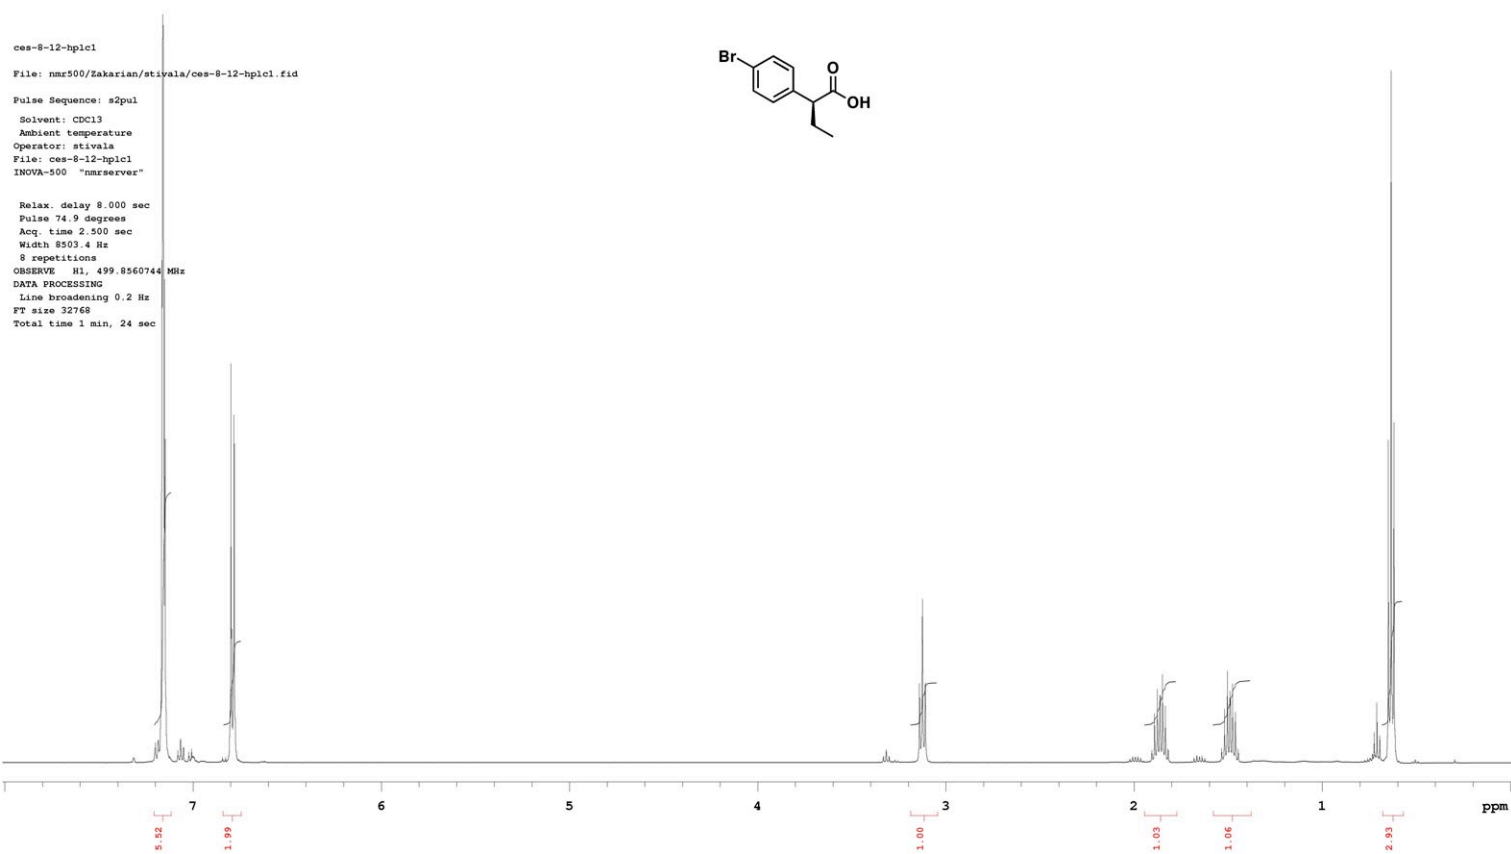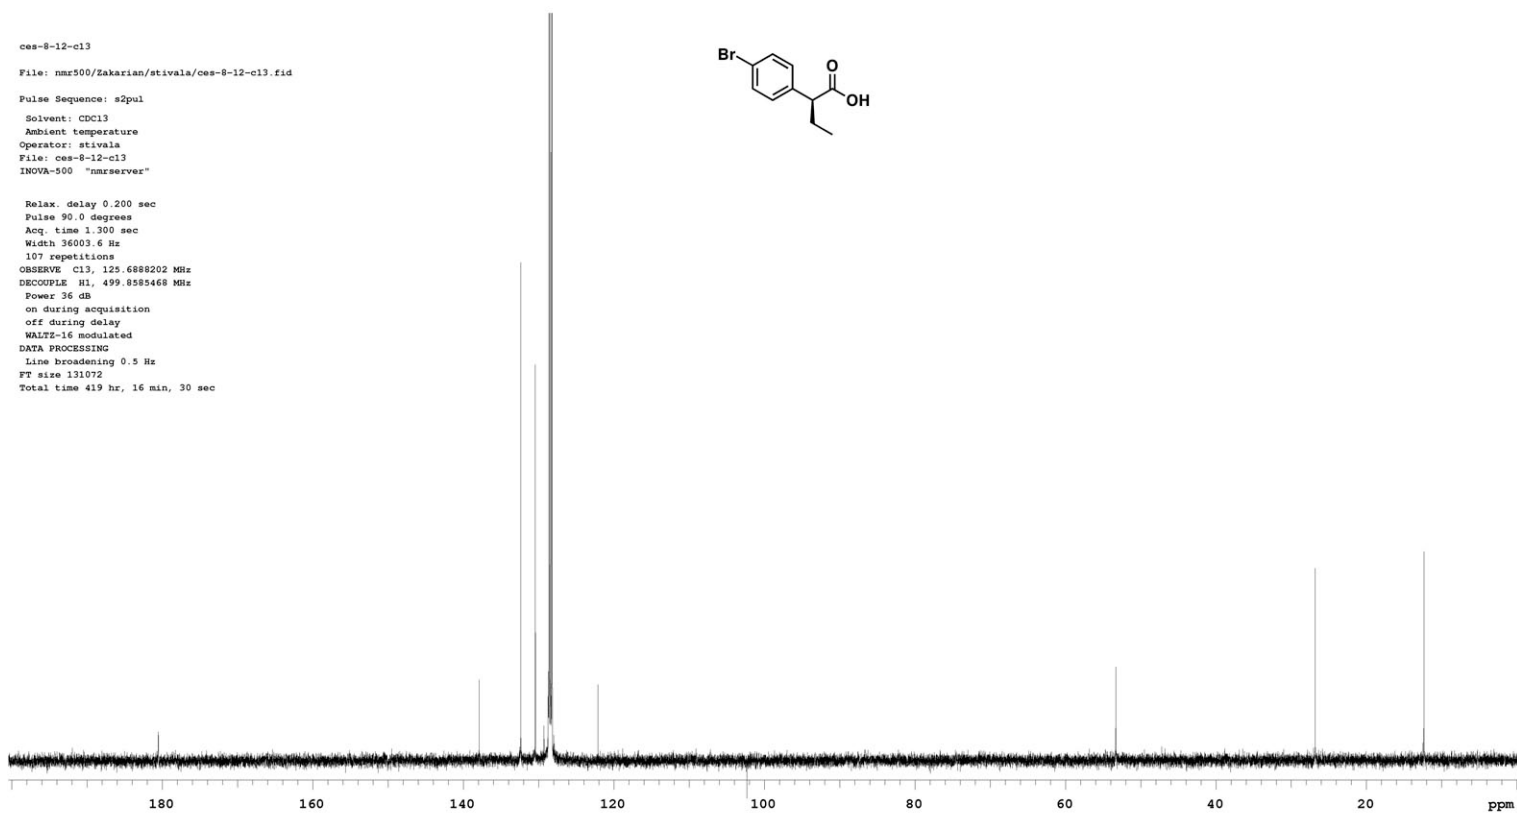

5/27/2011 10:01:16 1 / 1

## ==== Shimadzu LCsolution Analysis Report ====

C:\LabSolutions\Data\Project1\ces-8-12-06.lcd

Acquired by : Admin  
 Sample Name : ces-8-12  
 Sample ID : ces-8-12  
 Vial # :  
 Injection Volume : 15 uL  
 Data File Name : ces-8-12-06.lcd  
 Method File Name : ces-AD-H-analytical 0.46cm x 25cm.lcm  
 Batch File Name :  
 Report File Name : Default.lcr  
 Data Acquired : 5/7/2011 4:42:27 PM  
 Data Processed : 5/7/2011 5:58:26 PM

### <Chromatogram>

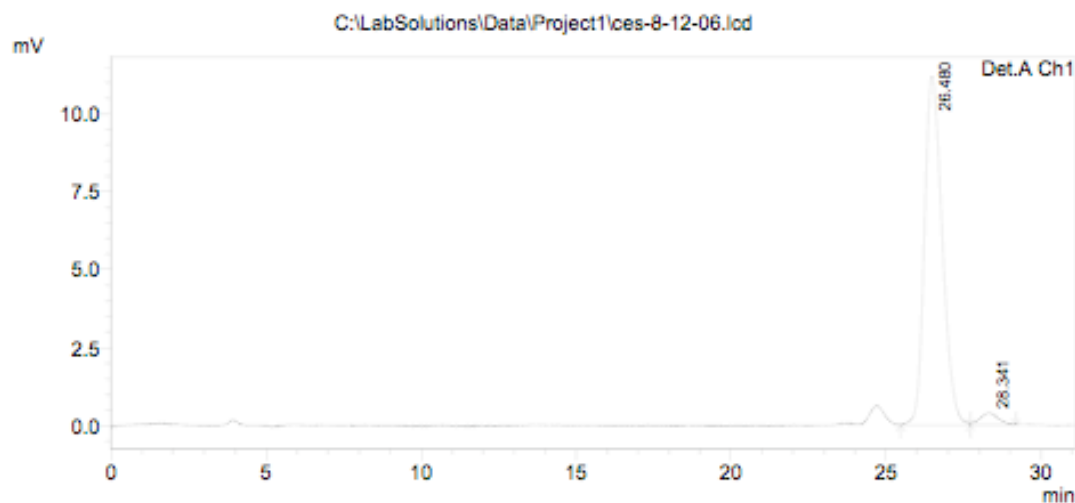

1 Det.A Ch1/215nm

PeakTable

Detector A Ch1 215nm

| Peak# | Ret. Time | Area   | Height | Area %  | Height % |
|-------|-----------|--------|--------|---------|----------|
| 1     | 26.480    | 447226 | 11185  | 96.646  | 96.742   |
| 2     | 28.341    | 15521  | 377    | 3.354   | 3.258    |
| Total |           | 462748 | 11562  | 100.000 | 100.000  |

C:\LabSolutions\Data\Project1\ces-8-12-06.lcd



5/27/2011 11:45:18 1 / 1

## ==== Shimadzu LCsolution Analysis Report ====

C:\LabSolutions\Data\Project1\ces-8-14-03.lcd

Acquired by : Admin  
 Sample Name : ces-8-14  
 Sample ID : ces-8-14  
 Vial # :  
 Injection Volume : 15 uL  
 Data File Name : ces-8-14-03.lcd  
 Method File Name : ces-AD-H-analytical 0.46cm x 25cm.lcm  
 Batch File Name :  
 Report File Name : Default.lcr  
 Data Acquired : 5/7/2011 5:19:13 PM  
 Data Processed : 5/7/2011 6:59:01 PM

### <Chromatogram>

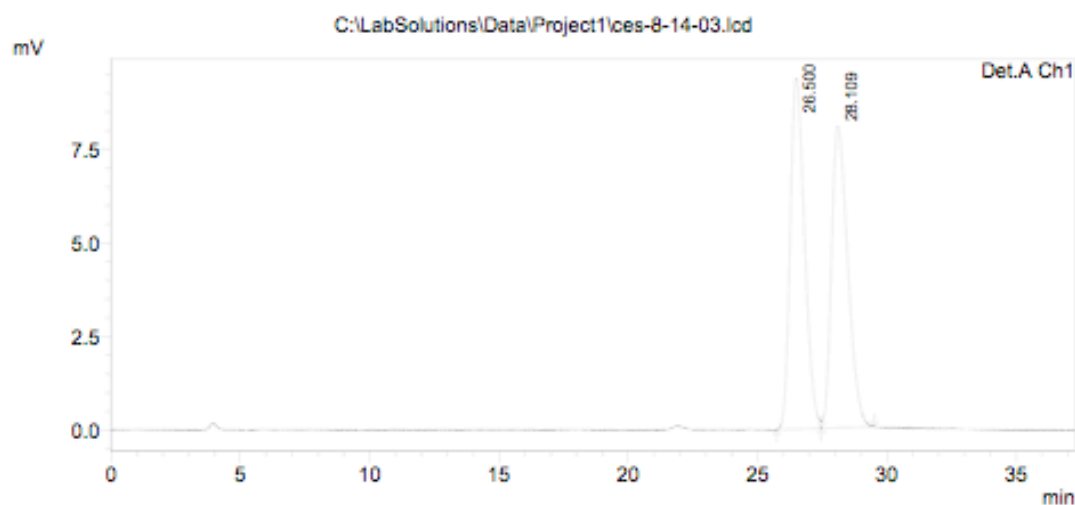

1 Det.A Ch1/215nm

PeakTable

Detector A Ch1 215nm

| Peak# | Ret. Time | Area   | Height | Area %  | Height % |
|-------|-----------|--------|--------|---------|----------|
| 1     | 26.500    | 364163 | 9380   | 50.796  | 53.735   |
| 2     | 28.109    | 352754 | 8076   | 49.204  | 46.265   |
| Total |           | 716918 | 17455  | 100.000 | 100.000  |

C:\LabSolutions\Data\Project1\ces-8-14-03.lcd

ces-8-43  
 File: nmr500/Zakarian/stivala/ces-8-43.fid  
 Pulse Sequence: s2pul  
 Solvent: CDCl3  
 Ambient temperature  
 Operator: stivala  
 File: ces-8-43  
 INOVA-500 "nmrserver"  
 Relax. delay 8.000 sec  
 Pulse 74.9 degrees  
 Acq. time 2.500 sec  
 Width 8503.4 Hz  
 8 repetitions  
 OBSERVE H1, 499.8560508 MHz  
 DATA PROCESSING  
 Line broadening 0.2 Hz  
 FT size 32768  
 Total time 1 min, 24 sec

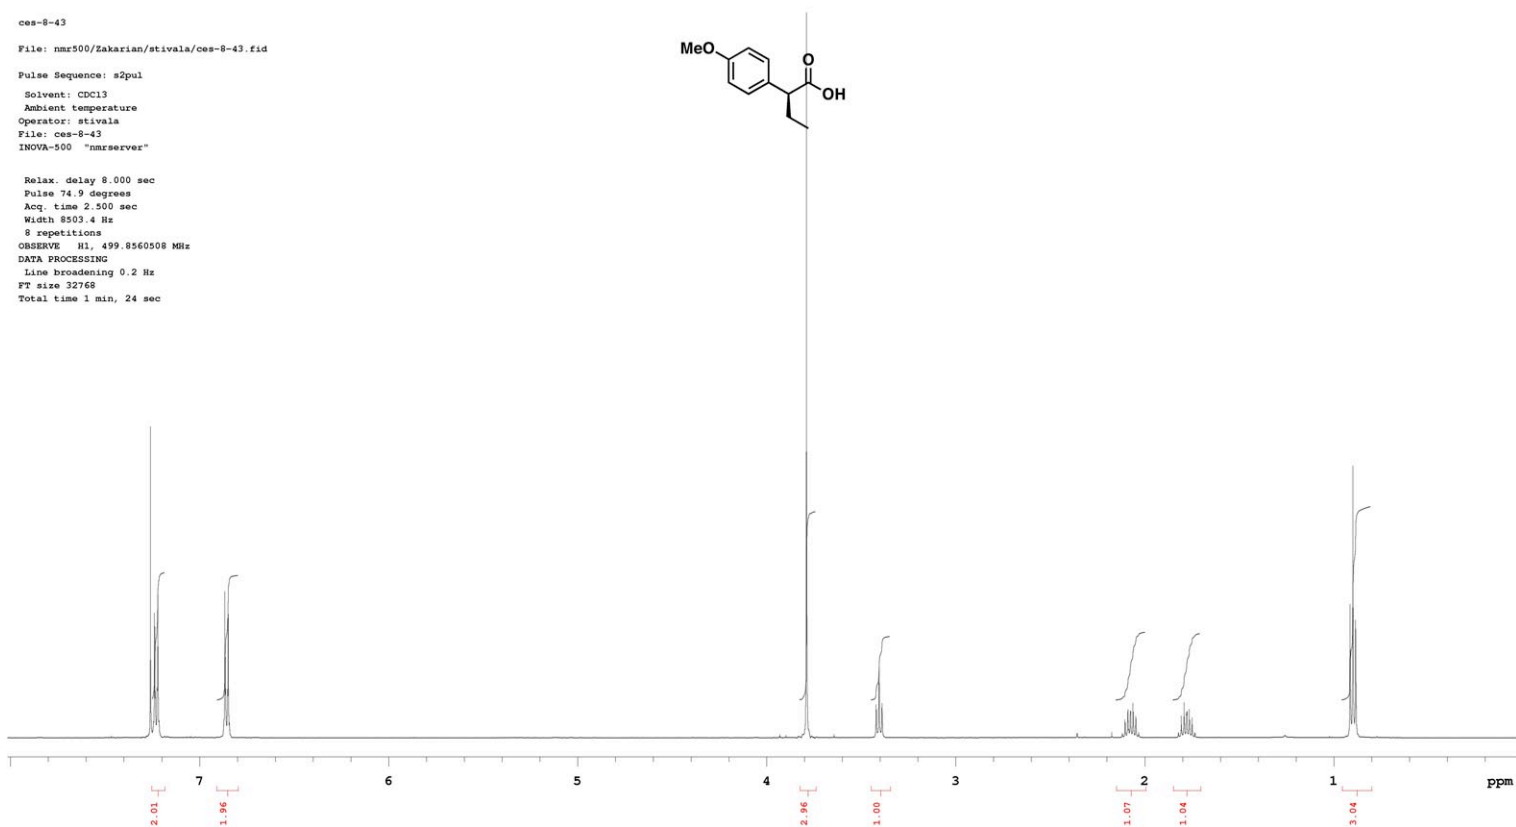

ces-8-43-cl3  
 File: nmr500/Zakarian/stivala/ces-8-43-cl3.fid  
 Pulse Sequence: s2pul  
 Solvent: CDCl3  
 Ambient temperature  
 Operator: stivala  
 File: ces-8-43-cl3  
 INOVA-500 "nmrserver"  
 Relax. delay 0.200 sec  
 Pulse 90.0 degrees  
 Acq. time 1.300 sec  
 Width 36003.6 Hz  
 1478 repetitions  
 OBSERVE C13, 125.6888777 MHz  
 DECOUPLE H1, 499.855468 MHz  
 Power 36 dB  
 on during acquisition  
 off during delay  
 WALTZ-16 modulated  
 DATA PROCESSING  
 Line broadening 0.5 Hz  
 FT size 131072  
 Total time 419 hr, 16 min, 30 sec

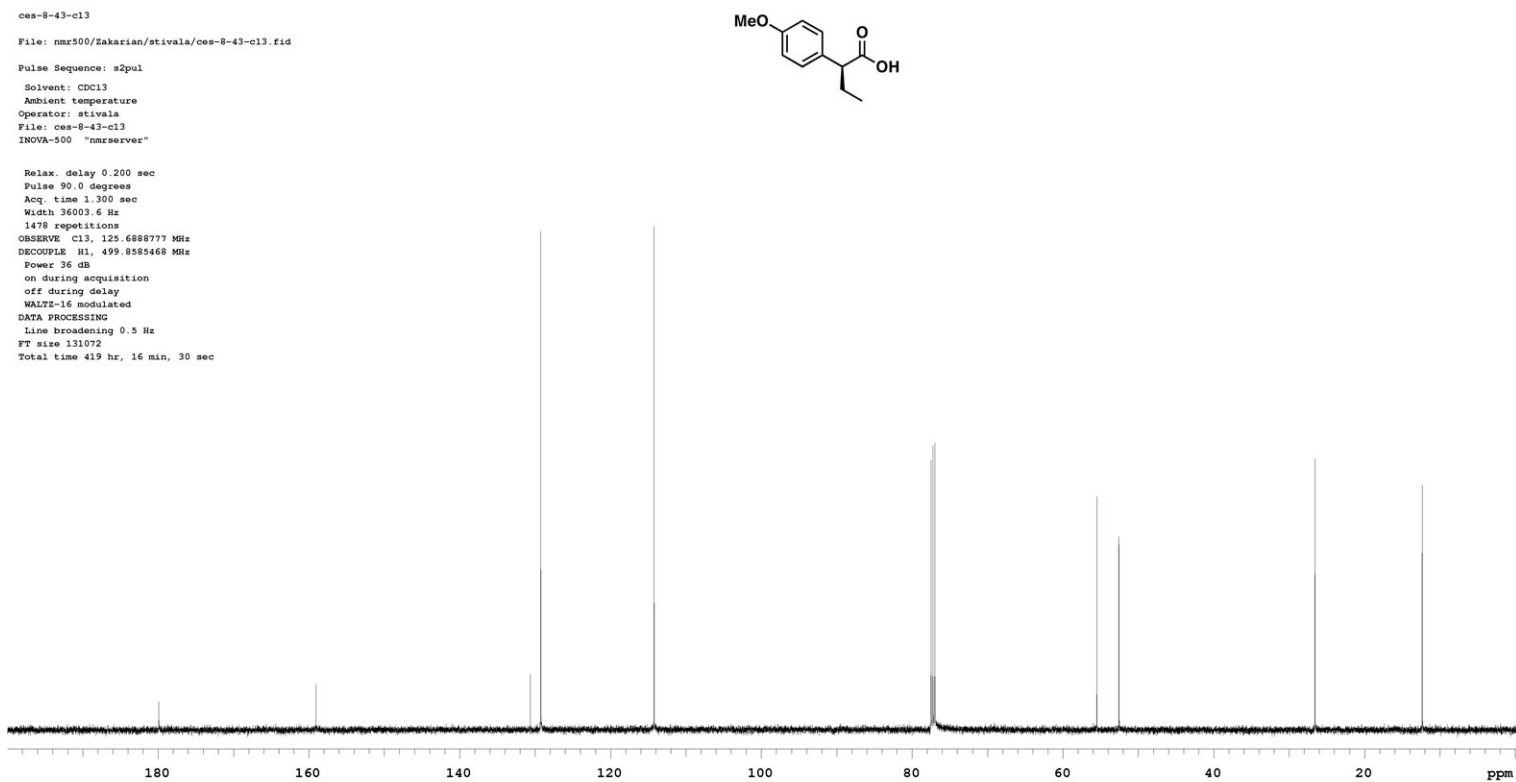

5/27/2011 10:02:14 1 / 1

## ==== Shimadzu LCsolution Analysis Report ====

C:\LabSolutions\Data\Project1\ces-8-43.lcd

Acquired by : Admin  
 Sample Name : ces-8-43  
 Sample ID : ces-8-43  
 Vial # :  
 Injection Volume : 20 uL  
 Data File Name : ces-8-43.lcd  
 Method File Name : ces-OD-H-analytical.lcm  
 Batch File Name :  
 Report File Name : Default.lcr  
 Data Acquired : 4/7/2011 4:11:17 PM  
 Data Processed : 4/7/2011 6:21:02 PM

### <Chromatogram>

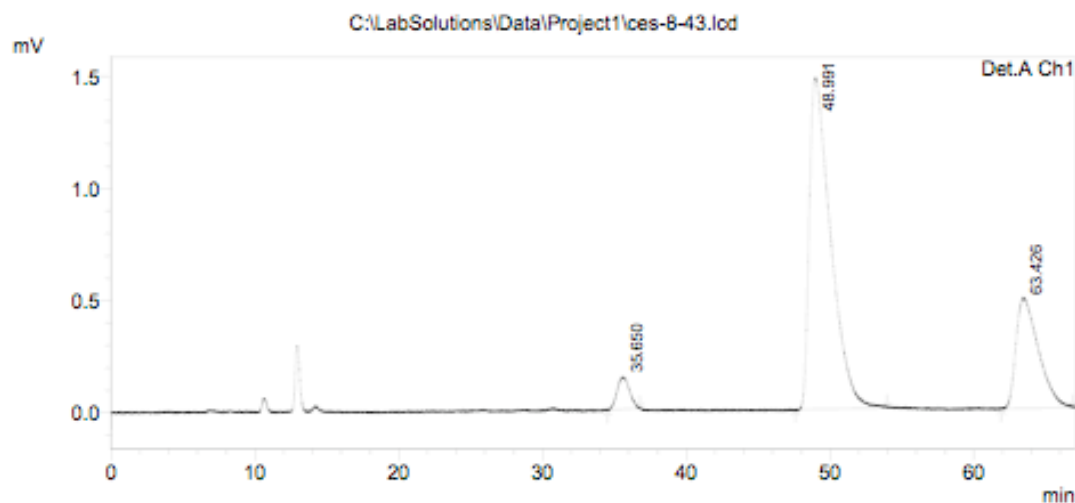

1 Det.A Ch1/275nm

PeakTable

Detector A Ch1 275nm

| Peak# | Ret. Time | Area   | Height | Area %  | Height % |
|-------|-----------|--------|--------|---------|----------|
| 1     | 35.650    | 8653   | 146    | 4.014   | 6.886    |
| 2     | 48.991    | 153344 | 1480   | 71.140  | 69.813   |
| 3     | 63.426    | 53555  | 494    | 24.846  | 23.301   |
| Total |           | 215551 | 2120   | 100.000 | 100.000  |

C:\LabSolutions\Data\Project1\ces-8-43.lcd

5/27/2011 11:55:08 1 / 1

## ==== Shimadzu LCsolution Analysis Report ====

C:\LabSolutions\Data\Project1\ces-8-38.lcd

Acquired by : Admin  
 Sample Name : ces-8-38  
 Sample ID : ces-8-38  
 Vial # :  
 Injection Volume : 20 uL  
 Data File Name : ces-8-38.lcd  
 Method File Name : ces-OD-H-analytical.lcm  
 Batch File Name :  
 Report File Name : Default.lcr  
 Data Acquired : 4/6/2011 4:30:51 PM  
 Data Processed : 4/7/2011 4:48:11 PM

### <Chromatogram>

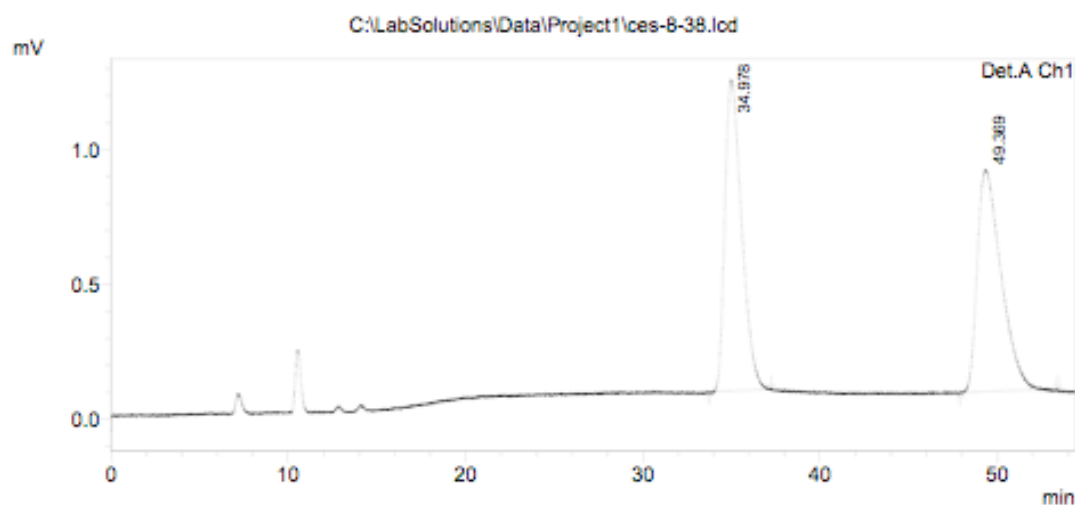

1 Det.A Ch1/275nm

PeakTable

Detector A Ch1 275nm

| Peak# | Ret. Time | Area   | Height | Area %  | Height % |
|-------|-----------|--------|--------|---------|----------|
| 1     | 34.978    | 76163  | 1155   | 49.872  | 58.304   |
| 2     | 49.369    | 76556  | 826    | 50.128  | 41.696   |
| Total |           | 152719 | 1980   | 100.000 | 100.000  |

C:\LabSolutions\Data\Project1\ces-8-38.lcd

ces-8-42  
 File: nmr500/Zakarian/stivala/ces-8-42.fid  
 Pulse Sequence: s2pul  
 Solvent: cdcl3  
 Ambient temperature  
 Operator: stivala  
 File: ces-8-42  
 INOVA-500 "nmrserver"

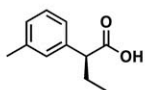

Relax. delay 8.000 sec  
 Pulse 74.9 degrees  
 Acq. time 2.500 sec  
 Width 8002.4 Hz  
 8 repetitions  
 OBSERVE H1, 499.8560505 MHz  
 DATA PROCESSING  
 Line broadening 0.2 Hz  
 FT size 32768  
 Total time 0 min, 0 sec

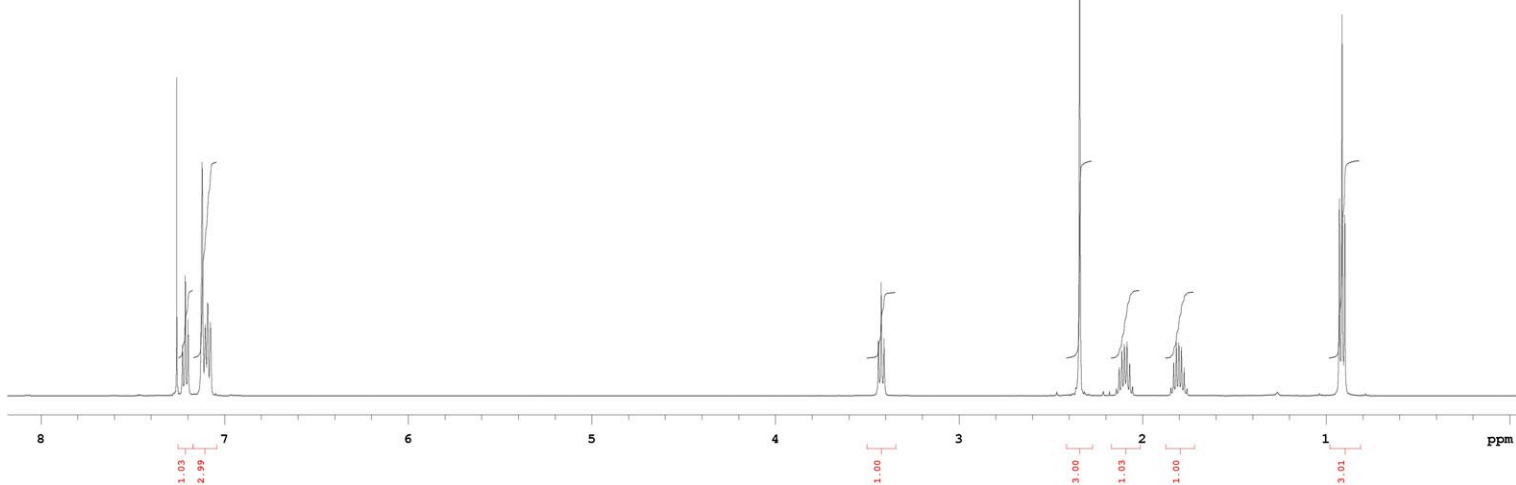

ces-8-42-cl3  
 File: nmr500/Zakarian/stivala/ces-8-42-cl3.fid  
 Pulse Sequence: s2pul  
 Solvent: CDCl3  
 Ambient temperature  
 Operator: stivala  
 File: ces-8-42-cl3  
 INOVA-500 "nmrserver"

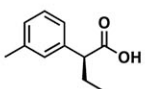

Relax. delay 0.200 sec  
 Pulse 90.0 degrees  
 Acq. time 1.300 sec  
 Width 36003.6 Hz  
 1471 repetitions  
 OBSERVE C13, 125.6889031 MHz  
 DECOUPLE H1, 499.855468 MHz  
 Power 36 dB  
 on during acquisition  
 off during delay  
 WALTZ-16 modulated  
 DATA PROCESSING  
 Line broadening 0.5 Hz  
 FT size 131072  
 Total time 419 hr, 16 min, 30 sec

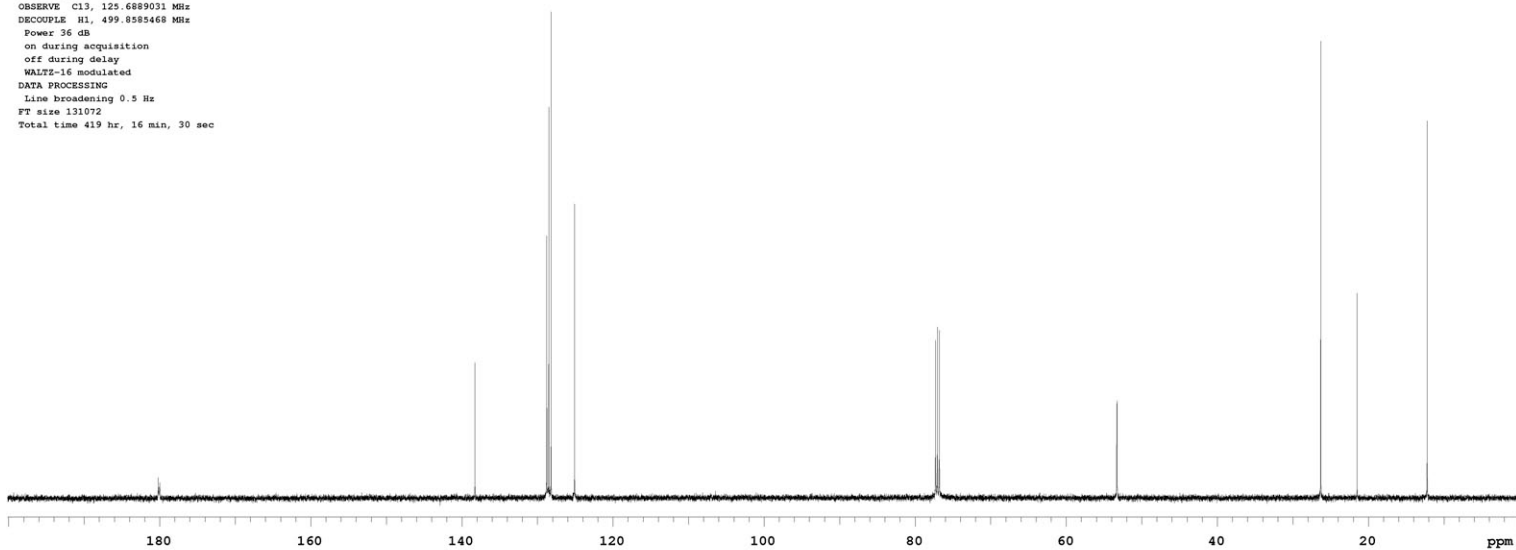

5/27/2011 10:02:56 1 / 1

## ==== Shimadzu LCsolution Analysis Report ====

C:\LabSolutions\Data\Project1\ces-8-42.lcd

Acquired by : Admin  
 Sample Name : ces-8-42  
 Sample ID : ces-8-42  
 Vial # :  
 Injection Volume : 20 uL  
 Data File Name : ces-8-42.lcd  
 Method File Name : ces-OD-H-analytical.lcm  
 Batch File Name :  
 Report File Name : Default.lcr  
 Data Acquired : 4/7/2011 12:25:31 PM  
 Data Processed : 4/7/2011 1:02:48 PM

### <Chromatogram>

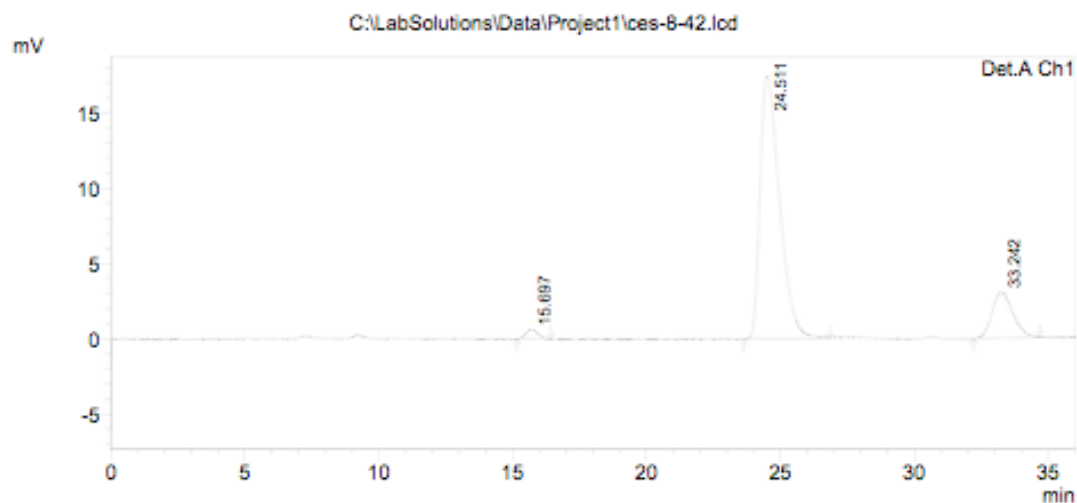

1 Det.A Ch1/215nm

PeakTable

| Peak# | Ret. Time | Area    | Height | Area %  | Height % |
|-------|-----------|---------|--------|---------|----------|
| 1     | 15.697    | 19861   | 635    | 1.855   | 3.005    |
| 2     | 24.511    | 885905  | 17466  | 82.764  | 82.613   |
| 3     | 33.242    | 164638  | 3041   | 15.381  | 14.383   |
| Total |           | 1070403 | 21142  | 100.000 | 100.000  |

C:\LabSolutions\Data\Project1\ces-8-42.lcd

5/27/2011 11:56:23 1 / 1

## ==== Shimadzu LCsolution Analysis Report ====

C:\LabSolutions\Data\Project1\ces-8-40-02.lcd

Acquired by : Admin  
 Sample Name : ces-8-40  
 Sample ID : ces-8-40  
 Vial # :  
 Injection Volume : 20 uL  
 Data File Name : ces-8-40-02.lcd  
 Method File Name : ces-OD-H-analytical.lcm  
 Batch File Name :  
 Report File Name : Default.lcr  
 Data Acquired : 4/6/2011 7:46:27 PM  
 Data Processed : 4/7/2011 1:01:47 PM

### <Chromatogram>

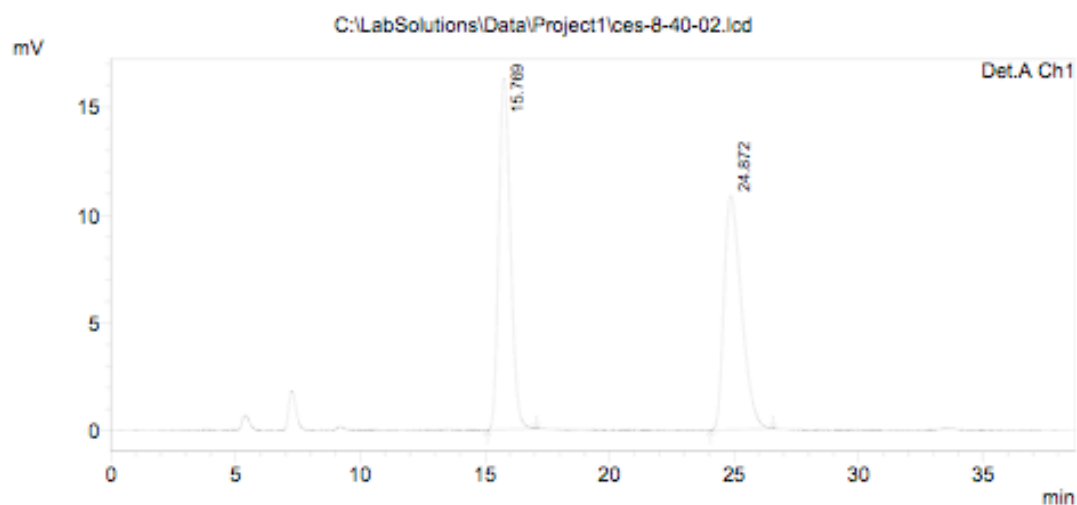

1 Det.A Ch1/215nm

PeakTable

Detector A Ch1 215nm

| Peak# | Ret. Time | Area    | Height | Area %  | Height % |
|-------|-----------|---------|--------|---------|----------|
| 1     | 15.769    | 530148  | 16267  | 50.006  | 59.995   |
| 2     | 24.872    | 530020  | 10847  | 49.994  | 40.005   |
| Total |           | 1060169 | 27115  | 100.000 | 100.000  |

C:\LabSolutions\Data\Project1\ces-8-40-02.lcd

ces-8-46  
 File: nmr500/Zakarian/stivala/ces-8-46.fid  
 Pulse Sequence: s2pul  
 Solvent: CDCl3  
 Ambient temperature  
 Operator: stivala  
 File: ces-8-46  
 INOVA-500 "nmrserver"  
 Relax. delay 8.000 sec  
 Pulse 74.9 degrees  
 Acq. time 2.500 sec  
 Width 8503.4 Hz  
 8 repetitions  
 OBSERVE H1, 499.8560508 MHz  
 DATA PROCESSING  
 Line broadening 0.2 Hz  
 FT size 32768  
 Total time 1 min, 24 sec

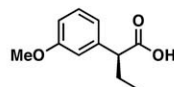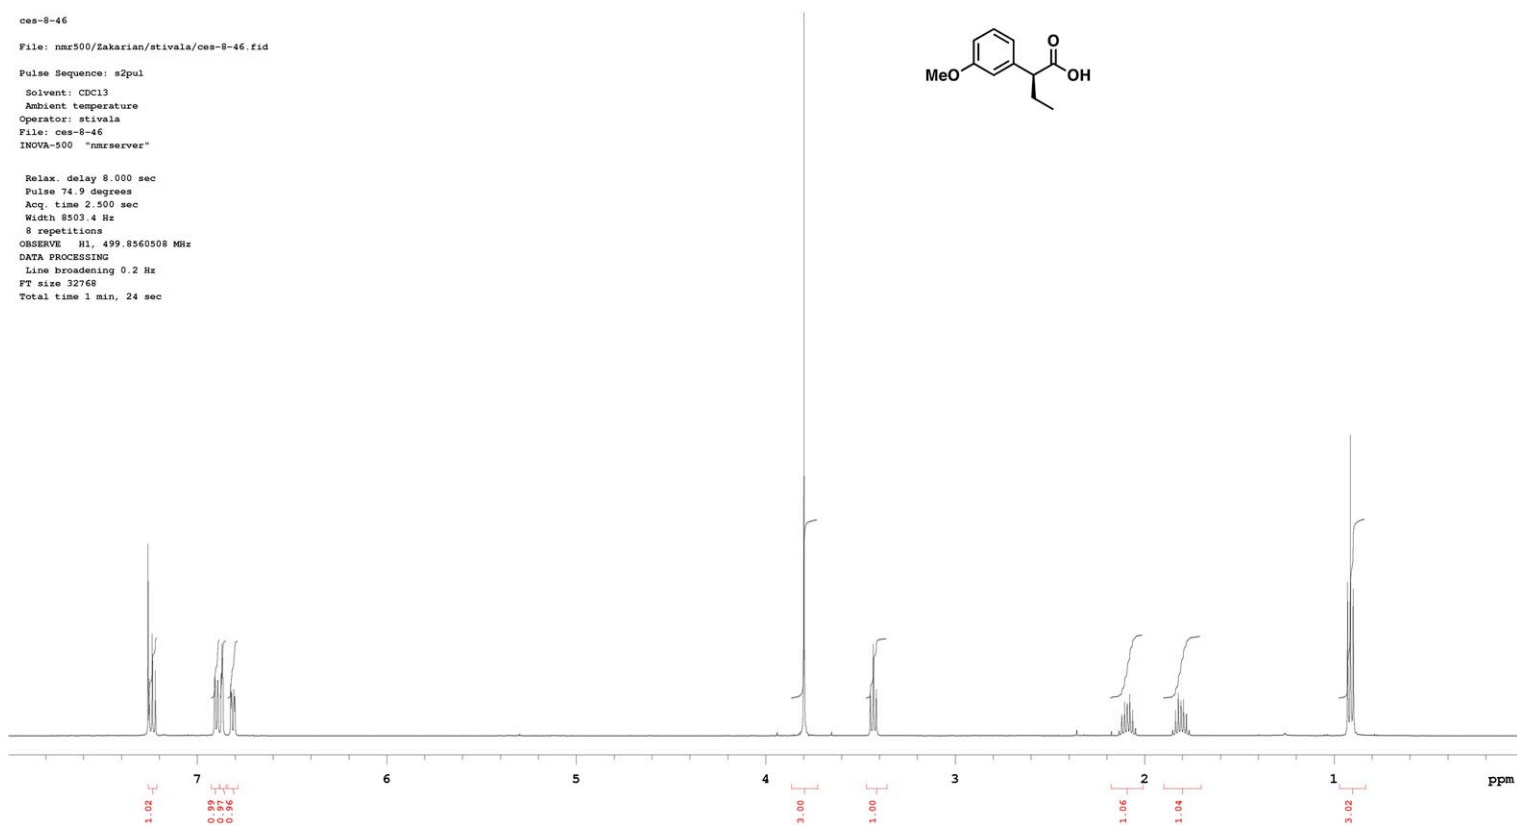

ces-8-46-cl3  
 File: nmr500/Zakarian/stivala/ces-8-46-cl3.fid  
 Pulse Sequence: s2pul  
 Solvent: CDCl3  
 Ambient temperature  
 Operator: stivala  
 File: ces-8-46-cl3  
 INOVA-500 "nmrserver"  
 Relax. delay 0.200 sec  
 Pulse 90.0 degrees  
 Acq. time 1.300 sec  
 Width 36003.6 Hz  
 1424 repetitions  
 OBSERVE C13, 125.6888777 MHz  
 DECOUPLE H1, 499.855468 MHz  
 Power 36 dB  
 on during acquisition  
 off during delay  
 WALTZ-16 modulated  
 DATA PROCESSING  
 Line broadening 0.5 Hz  
 FT size 131072  
 Total time 419 hr, 16 min, 30 sec

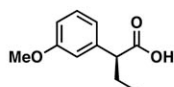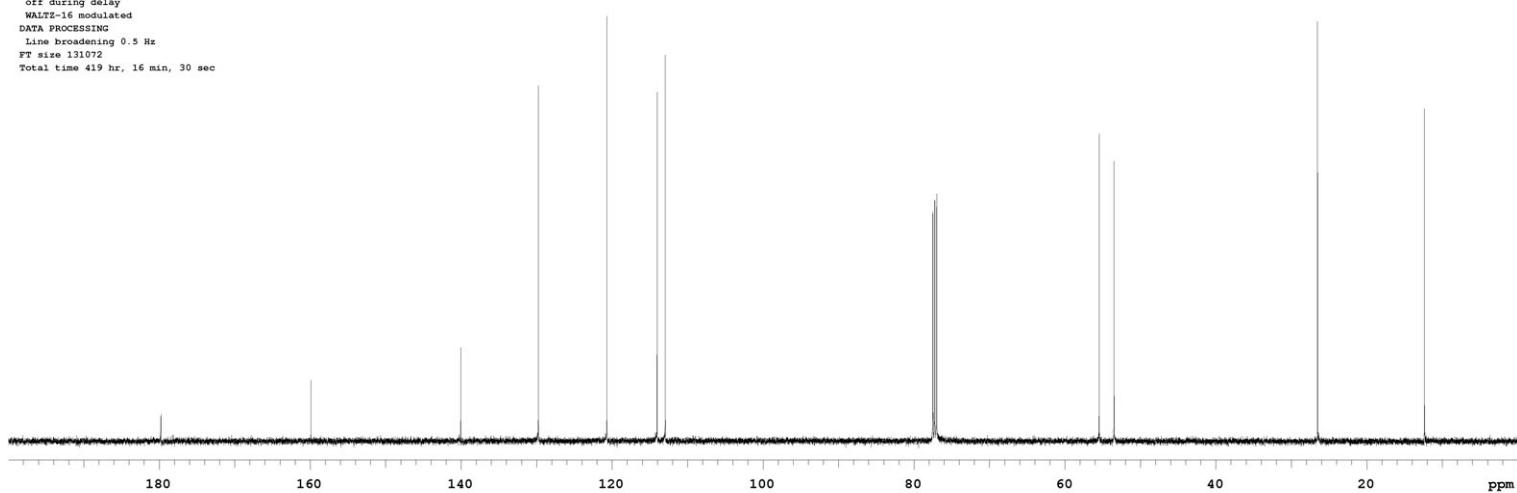



5/27/2011 10:03:40 1 / 1

## ==== Shimadzu LCsolution Analysis Report ====

C:\LabSolutions\Data\Project1\ces-8-46.lcd

Acquired by : Admin  
 Sample Name : ces-8-46  
 Sample ID : ces-8-46  
 Vial # :  
 Injection Volume : 20 uL  
 Data File Name : ces-8-46.lcd  
 Method File Name : ces-OD-H-analytical.lcm  
 Batch File Name :  
 Report File Name : Default.lcr  
 Data Acquired : 4/7/2011 5:52:24 PM  
 Data Processed : 4/7/2011 7:28:06 PM

### <Chromatogram>

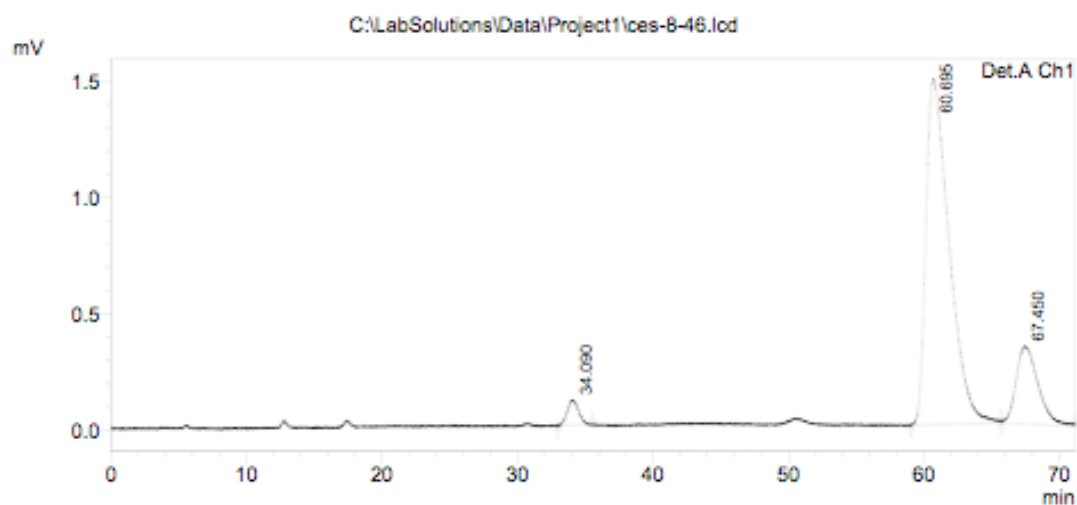

1 Det.A Ch1/275nm

PeakTable

Detector A Ch1 275nm

| Peak# | Ret. Time | Area   | Height | Area %  | Height % |
|-------|-----------|--------|--------|---------|----------|
| 1     | 34.090    | 6285   | 113    | 2.824   | 5.809    |
| 2     | 60.695    | 178483 | 1493   | 80.178  | 76.772   |
| 3     | 67.450    | 37840  | 339    | 16.998  | 17.419   |
| Total |           | 222608 | 1944   | 100.000 | 100.000  |

C:\LabSolutions\Data\Project1\ces-8-46.lcd

5/27/2011 11:54:18 1 / 1

## ==== Shimadzu LCsolution Analysis Report ====

C:\LabSolutions\Data\Project1\ces-8-41.lcd

Acquired by : Admin  
 Sample Name : ces-8-41  
 Sample ID : ces-8-41  
 Vial # :  
 Injection Volume : 20 uL  
 Data File Name : ces-8-41.lcd  
 Method File Name : ces-OD-H-analytical.lcm  
 Batch File Name :  
 Report File Name : Default.lcr  
 Data Acquired : 4/6/2011 5:49:34 PM  
 Data Processed : 4/7/2011 7:03:39 PM

### <Chromatogram>

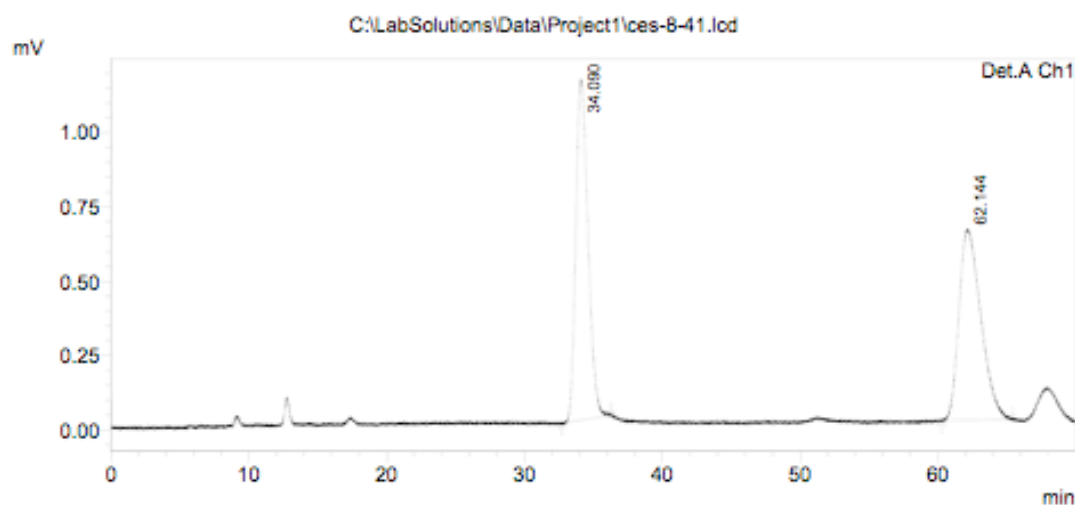

1 Det.A Ch1/275nm

PeakTable

Detector A Ch1 275nm

| Peak# | Ret. Time | Area   | Height | Area %  | Height % |
|-------|-----------|--------|--------|---------|----------|
| 1     | 34.090    | 70895  | 1146   | 49.971  | 64.051   |
| 2     | 62.144    | 70978  | 643    | 50.029  | 35.949   |
| Total |           | 141872 | 1790   | 100.000 | 100.000  |

C:\LabSolutions\Data\Project1\ces-8-41.lcd

ces-7-287

File: nmr500/Zakarian/stivala/ces-7-287.fid

Pulse Sequence: s2pul

Solvent: CDCl3

Ambient temperature

Operator: stivala

File: ces-7-287

INOVA-500 "nmrserver"

Relax. delay 8.000 sec  
 Pulse 74.9 degrees  
 Acq. time 2.500 sec  
 Width 8503.4 Hz  
 8 repetitions  
 OBSERVE H1, 499.8560503 MHz  
 DATA PROCESSING  
 Line broadening 0.2 Hz  
 FT size 32768  
 Total time 1 min, 24 sec

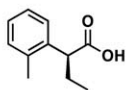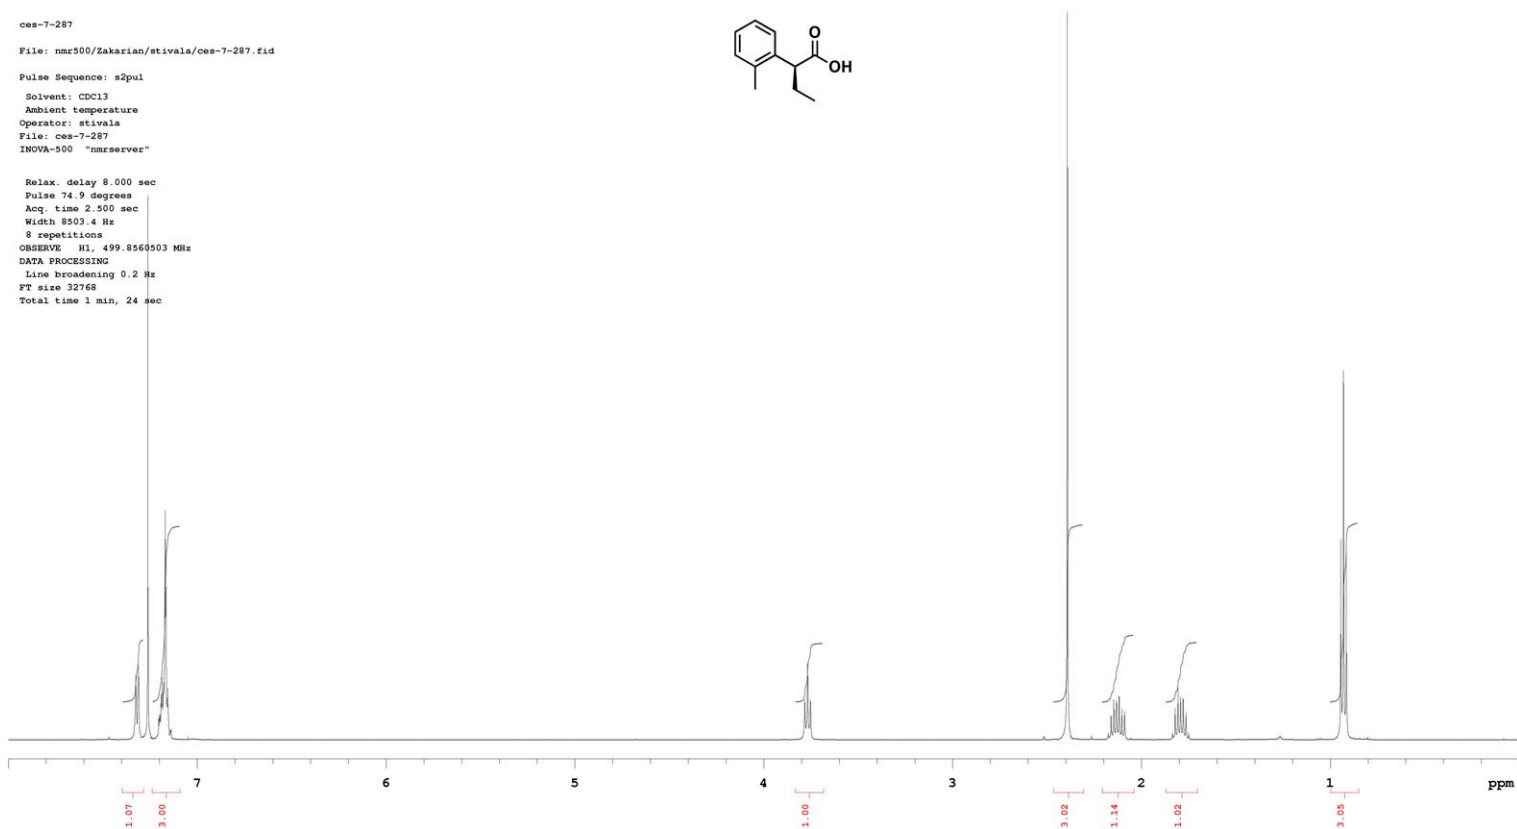

ces-7-287-c13

File: nmr500/Zakarian/stivala/ces-7-287-c13.fid

Pulse Sequence: s2pul

Solvent: CDCl3

Ambient temperature

Operator: stivala

File: ces-7-287-c13

INOVA-500 "nmrserver"

Relax. delay 0.200 sec  
 Pulse 90.0 degrees  
 Acq. time 1.300 sec  
 Width 36003.6 Hz  
 700 repetitions  
 OBSERVE C13, 125.6889788 MHz  
 DECOUPLE H1, 499.856468 MHz  
 Power 36 dB  
 on during acquisition  
 off during delay  
 WALTZ-16 modulated  
 DATA PROCESSING  
 Line broadening 0.5 Hz  
 FT size 131072  
 Total time 419 hr, 16 min, 30 sec

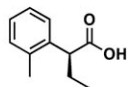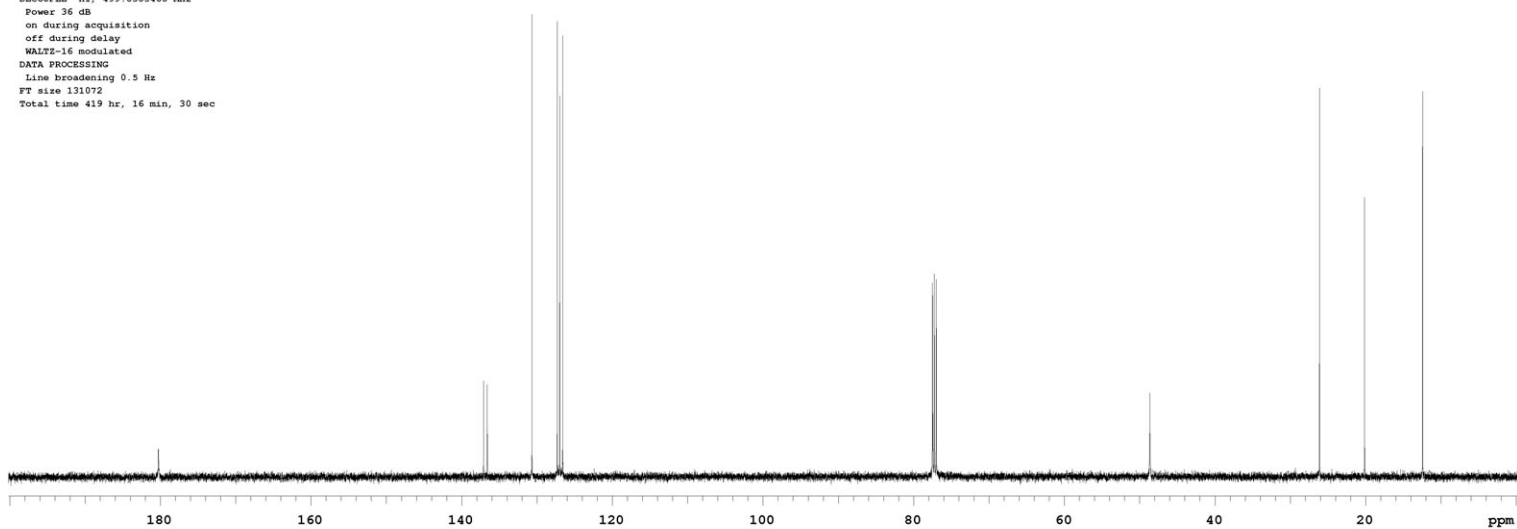

5/27/2011 10:04:36 1 / 1

## ==== Shimadzu LCsolution Analysis Report ====

C:\LabSolutions\Data\Project1\ces-7-287.lcd

Acquired by : Admin  
 Sample Name : ces-7-287  
 Sample ID : ces-7-287  
 Vial # :  
 Injection Volume : 20 uL  
 Data File Name : ces-7-287.lcd  
 Method File Name : ces-OD-H-analytical.lcm  
 Batch File Name :  
 Report File Name : Default.lcr  
 Data Acquired : 3/17/2011 9:29:08 PM  
 Data Processed : 3/17/2011 10:05:04 PM

### <Chromatogram>

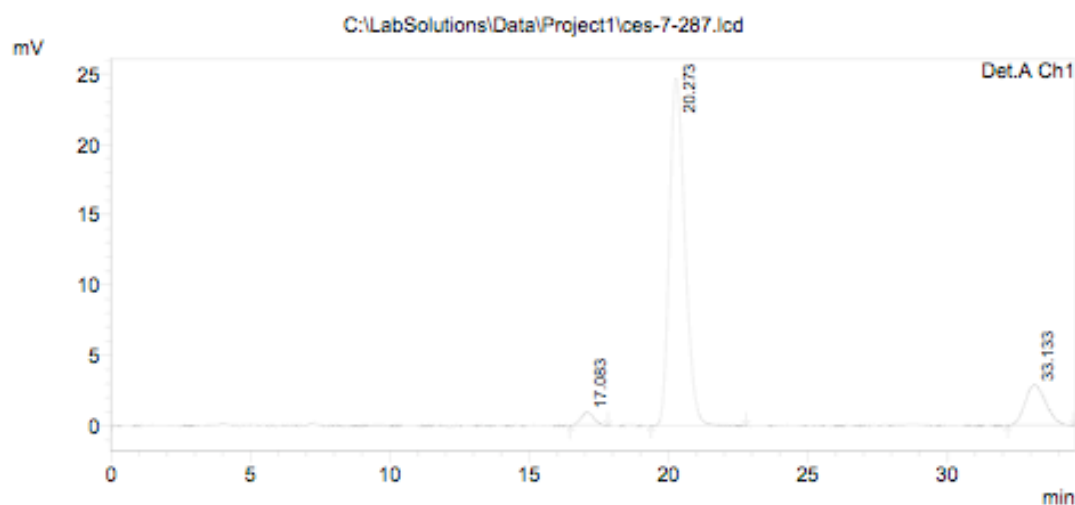

1 Det.A Ch1/215nm

PeakTable

Detector A Ch1 215nm

| Peak# | Ret. Time | Area    | Height | Area %  | Height % |
|-------|-----------|---------|--------|---------|----------|
| 1     | 17.083    | 30480   | 941    | 2.683   | 3.302    |
| 2     | 20.273    | 954479  | 24662  | 84.016  | 86.546   |
| 3     | 33.133    | 151103  | 2893   | 13.301  | 10.152   |
| Total |           | 1136062 | 28496  | 100.000 | 100.000  |

C:\LabSolutions\Data\Project1\ces-7-287.lcd

5/27/2011 11:19:52 1 / 1

## ==== Shimadzu LCsolution Analysis Report ====

C:\LabSolutions\Data\Project1\ces-7-284-02.lcd

Acquired by : Admin  
 Sample Name : ces-7-284  
 Sample ID : ces-7-284  
 Vial # :  
 Injection Volume : 20 uL  
 Data File Name : ces-7-284-02.lcd  
 Method File Name : ces-OD-H-analytical.lcm  
 Batch File Name :  
 Report File Name : Default.lcr  
 Data Acquired : 3/17/2011 5:08:46 PM  
 Data Processed : 3/17/2011 6:19:54 PM

### <Chromatogram>

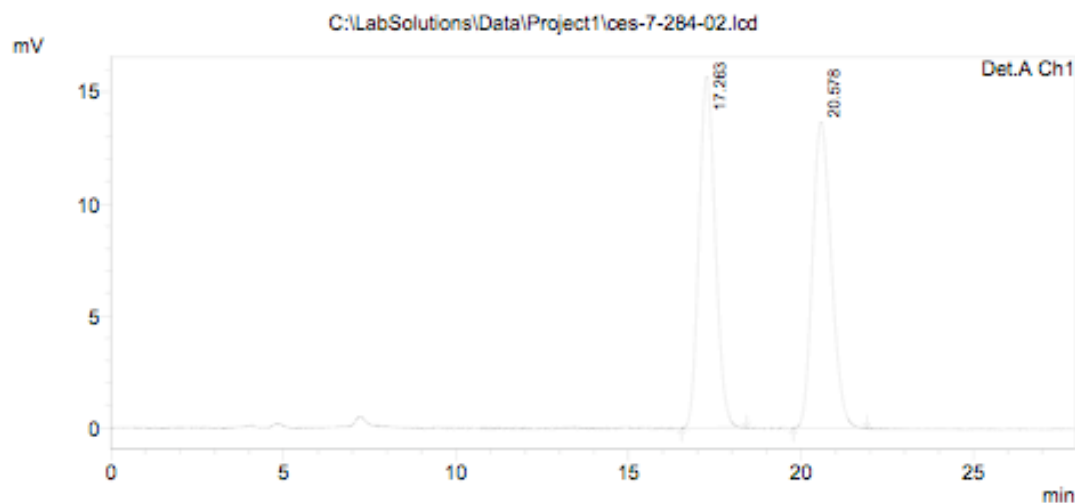

1 Det.A Ch1/215nm

PeakTable

Detector A Ch1 215nm

| Peak# | Ret. Time | Area    | Height | Area %  | Height % |
|-------|-----------|---------|--------|---------|----------|
| 1     | 17.263    | 516577  | 15724  | 49.854  | 53.491   |
| 2     | 20.578    | 519608  | 13672  | 50.146  | 46.509   |
| Total |           | 1036185 | 29395  | 100.000 | 100.000  |

C:\LabSolutions\Data\Project1\ces-7-284-02.lcd

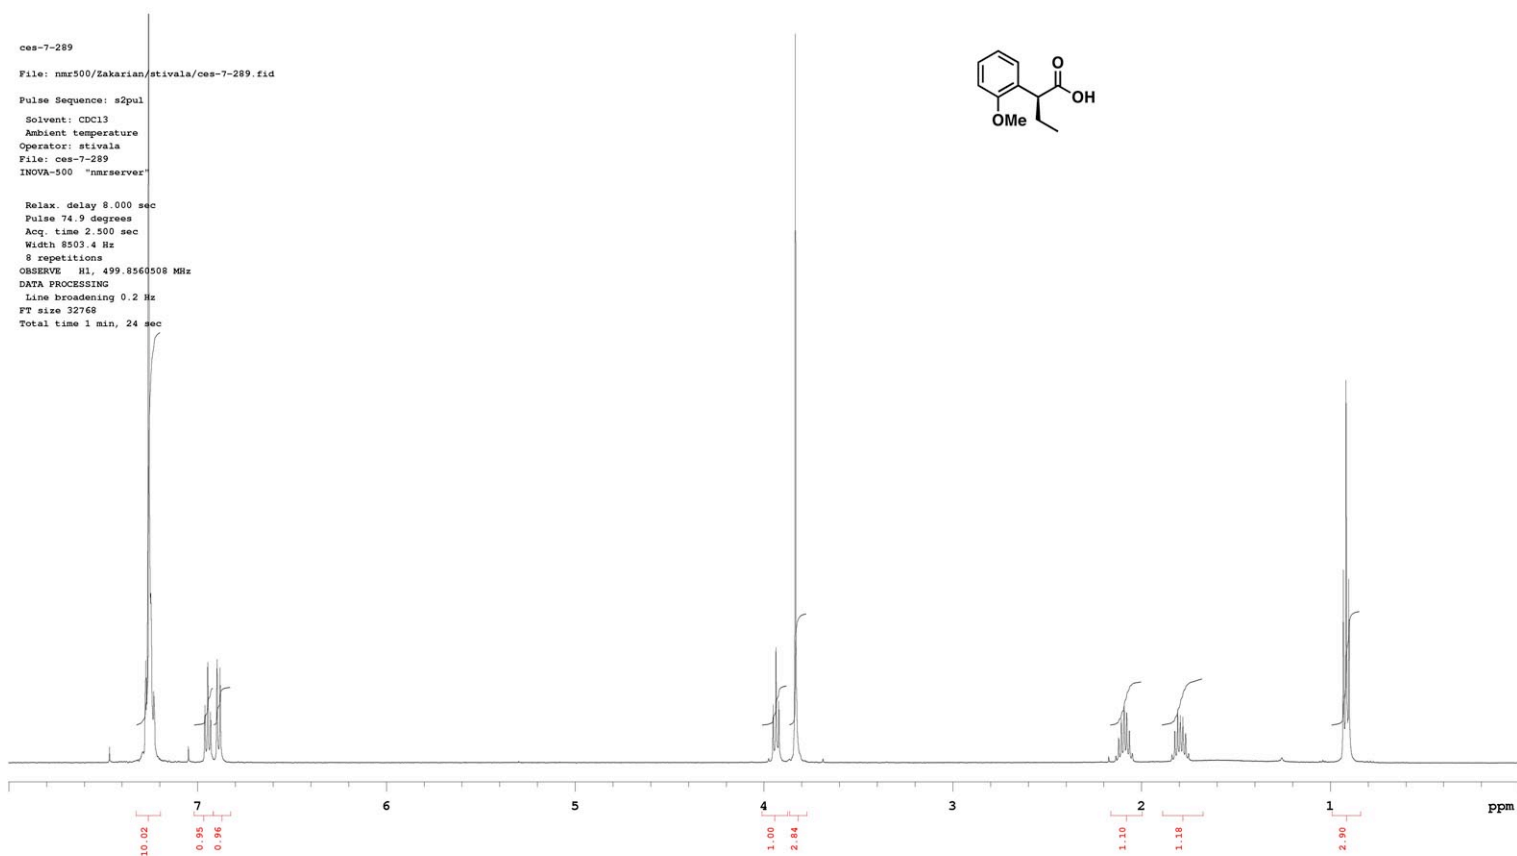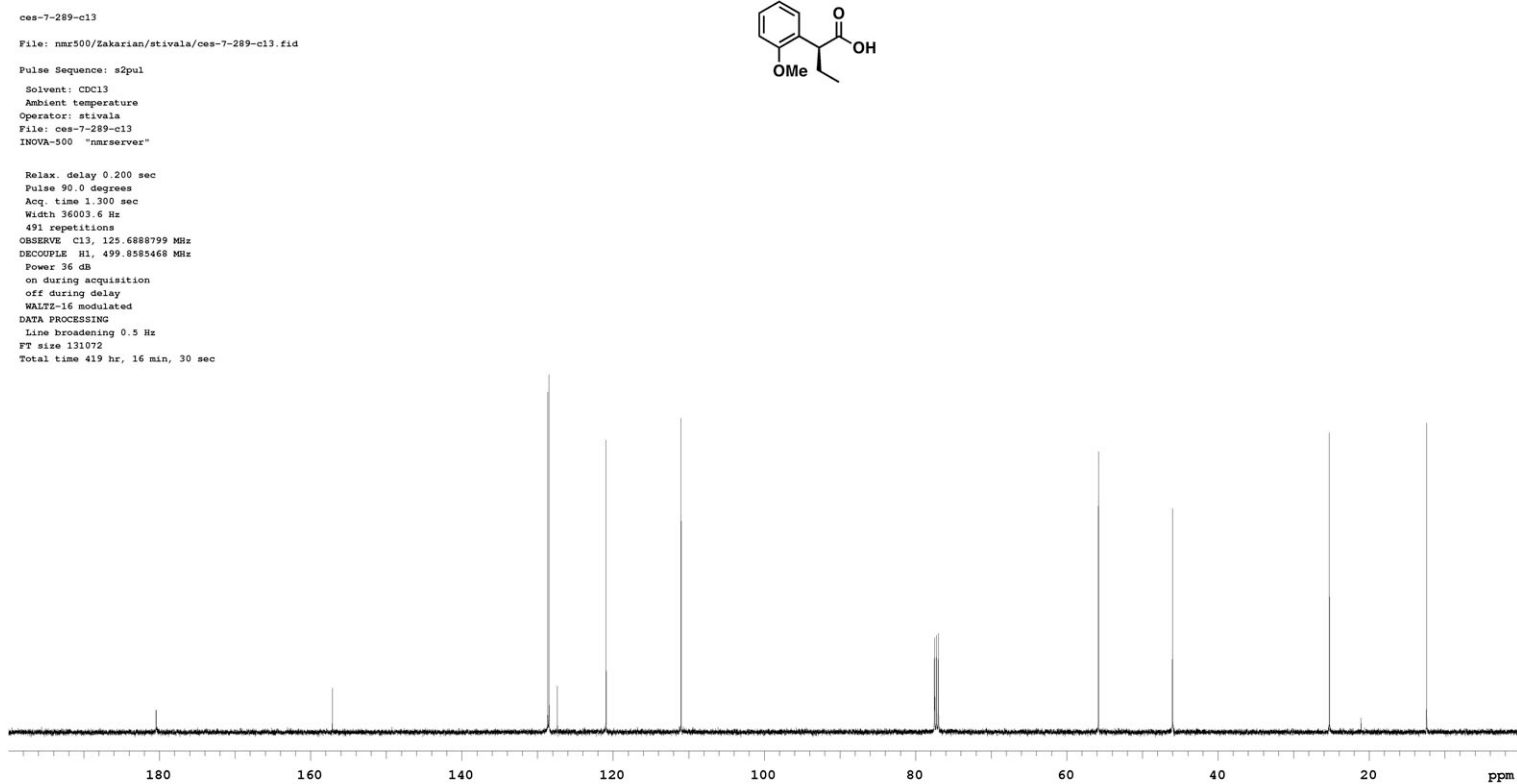

5/27/2011 16:45:35 1 / 1

## ==== Shimadzu LCsolution Analysis Report ====

C:\LabSolutions\Data\Project1\ces-7-289-02.lcd

Acquired by : Admin  
 Sample Name : ces-7-289  
 Sample ID : ces-7-289  
 Vial # :  
 Injection Volume : 25 uL  
 Data File Name : ces-7-289-02.lcd  
 Method File Name : ces-OD-H-analytical 0.46cm x 25cm.lcm  
 Batch File Name :  
 Report File Name : Default.lcr  
 Data Acquired : 5/27/2011 3:53:12 PM  
 Data Processed : 5/27/2011 4:42:06 PM

### <Chromatogram>

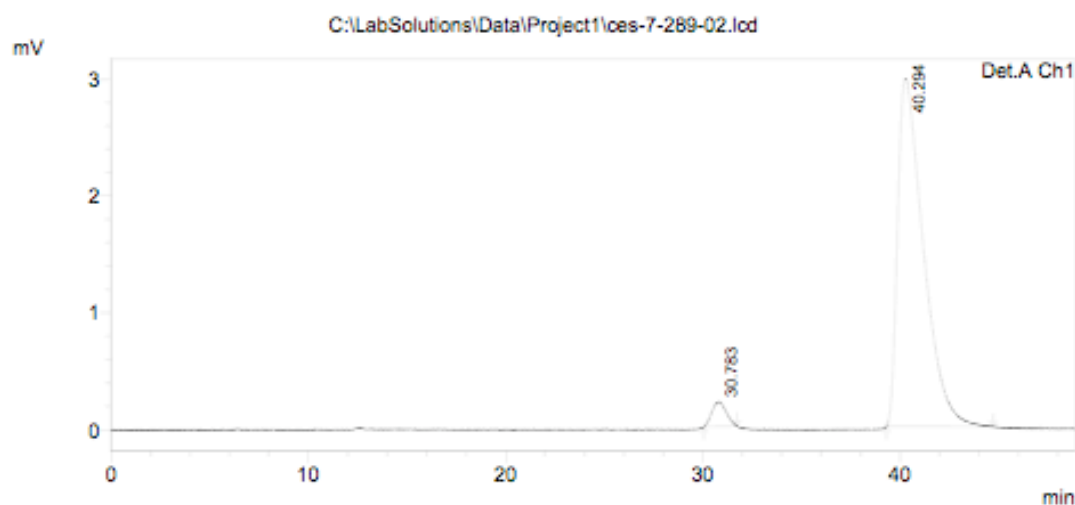

1 Det.A Ch1/275nm

PeakTable

Detector A Ch1 275nm

| Peak# | Ret. Time | Area   | Height | Area %  | Height % |
|-------|-----------|--------|--------|---------|----------|
| 1     | 30.783    | 10451  | 211    | 3.723   | 6.614    |
| 2     | 40.294    | 270278 | 2979   | 96.277  | 93.386   |
| Total |           | 280729 | 3190   | 100.000 | 100.000  |

C:\LabSolutions\Data\Project1\ces-7-289-02.lcd

5/27/2011 16:31:54 1 / 1

## ==== Shimadzu LCsolution Analysis Report ====

C:\LabSolutions\Data\Project1\ces-7-282-02.lcd

Acquired by : Admin  
 Sample Name : ces-7-282  
 Sample ID : ces-7-282  
 Vial # :  
 Injection Volume : 25 uL  
 Data File Name : ces-7-282-02.lcd  
 Method File Name : ces-OD-H-analytical 0.46cm x 25cm.lcm  
 Batch File Name :  
 Report File Name : Default.lcr  
 Data Acquired : 5/27/2011 2:45:12 PM  
 Data Processed : 5/27/2011 3:38:08 PM

### <Chromatogram>

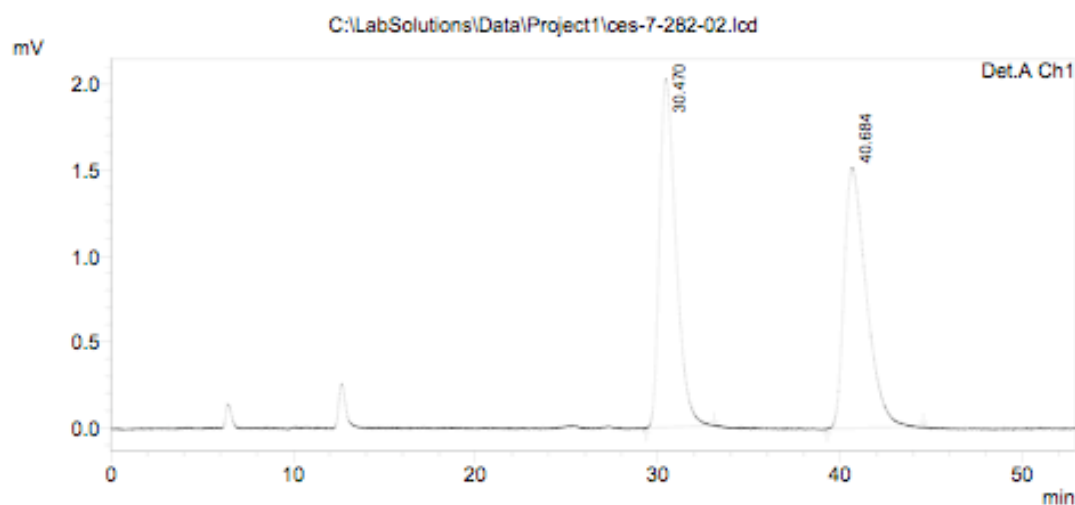

1 Det.A Ch1/275nm

PeakTable

| Peak# | Ret. Time | Area   | Height | Area %  | Height % |
|-------|-----------|--------|--------|---------|----------|
| 1     | 30.470    | 127608 | 2026   | 49.782  | 57.188   |
| 2     | 40.684    | 128727 | 1516   | 50.218  | 42.812   |
| Total |           | 256335 | 3542   | 100.000 | 100.000  |

C:\LabSolutions\Data\Project1\ces-7-282-02.lcd



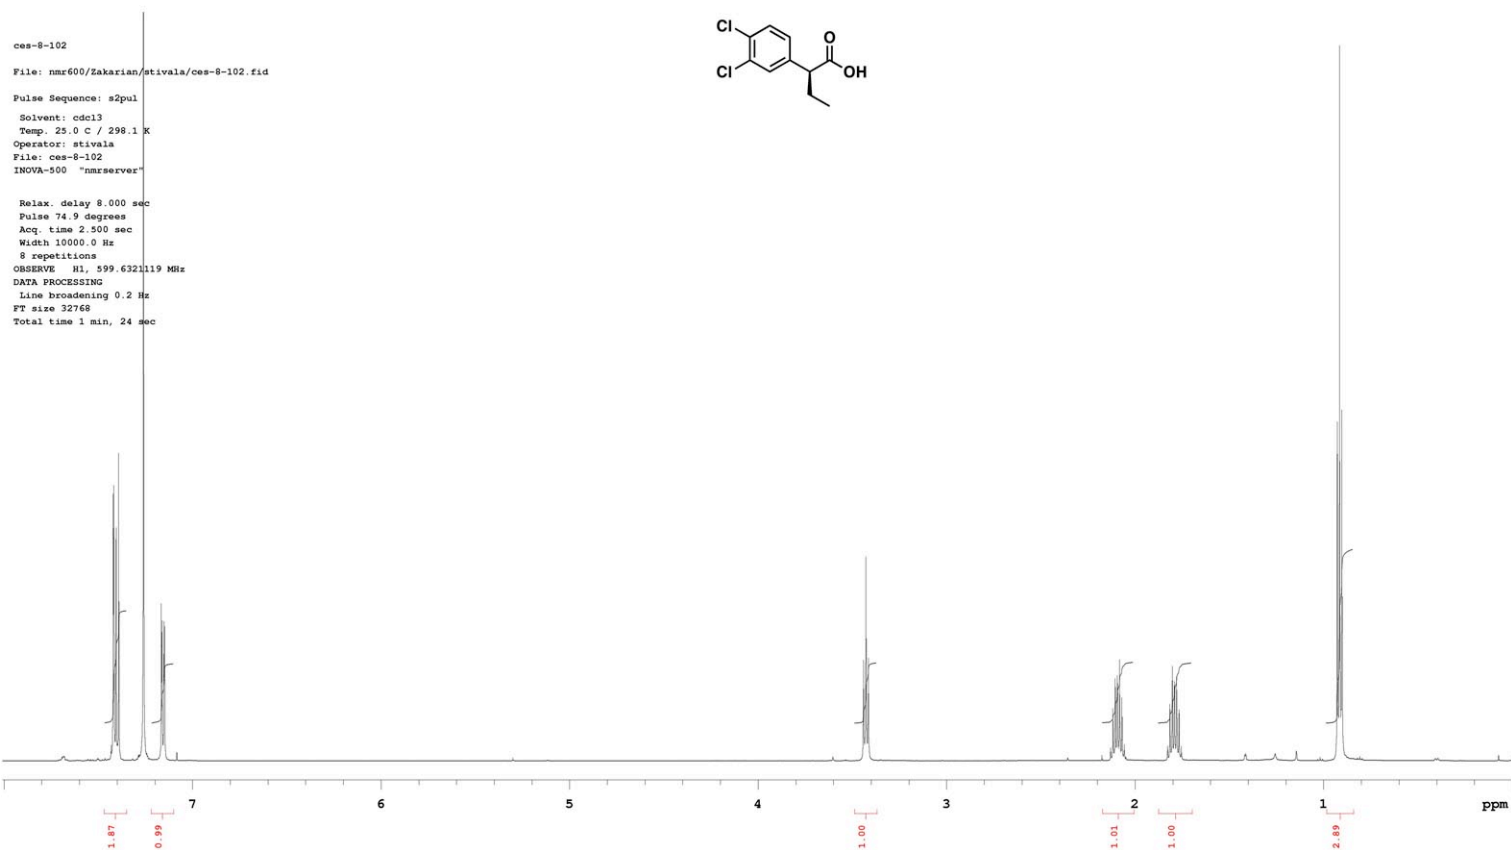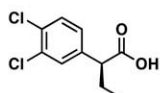

ces-8-102-c13

Sample: 1\_Indanone

File: nmr600/Zakarian/stivala/ces-8-102-c13.fid

Pulse Sequence: s2pul

Solvent: cdcl3

Temp. 25.0 C / 298.1 K

Operator: stivala

File: ces-8-102-c13

INOVA-500 "nmrserver"

Relax. delay 1.000 sec

Pulse 10.0 usec

Acq. time 1.298 sec

Width 36231.9 Hz

263 repetitions

OBSERVE C13, 150.7775803 MHz

DECOUPLE H1, 599.6351203 MHz

Power 34 dB

continuously on

WALTZ-16 modulated

DATA PROCESSING

Line broadening 0.5 Hz

FT size 131072

Total time 6 hr, 25 min, 1 sec

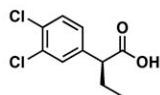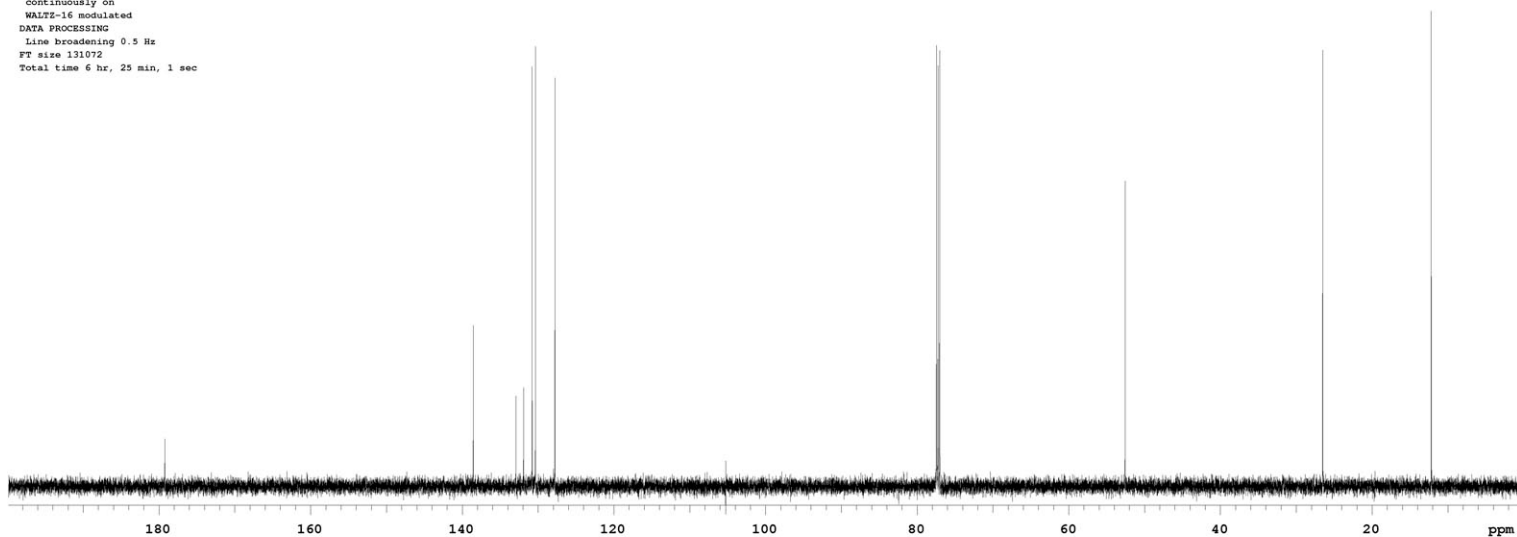

5/27/2011 10:06:02 1 / 1

## ==== Shimadzu LCsolution Analysis Report ====

C:\LabSolutions\Data\Project1\ces-8-102.lcd

Acquired by : Admin  
 Sample Name : ces-8-102  
 Sample ID : ces-8-102  
 Vial # :  
 Injection Volume : 10 uL  
 Data File Name : ces-8-102.lcd  
 Method File Name : ces-OJ-H-analytical 0.46cm x 25 cm.lcm  
 Batch File Name :  
 Report File Name : Default.lcr  
 Data Acquired : 5/4/2011 3:18:28 PM  
 Data Processed : 5/4/2011 4:19:06 PM

### <Chromatogram>

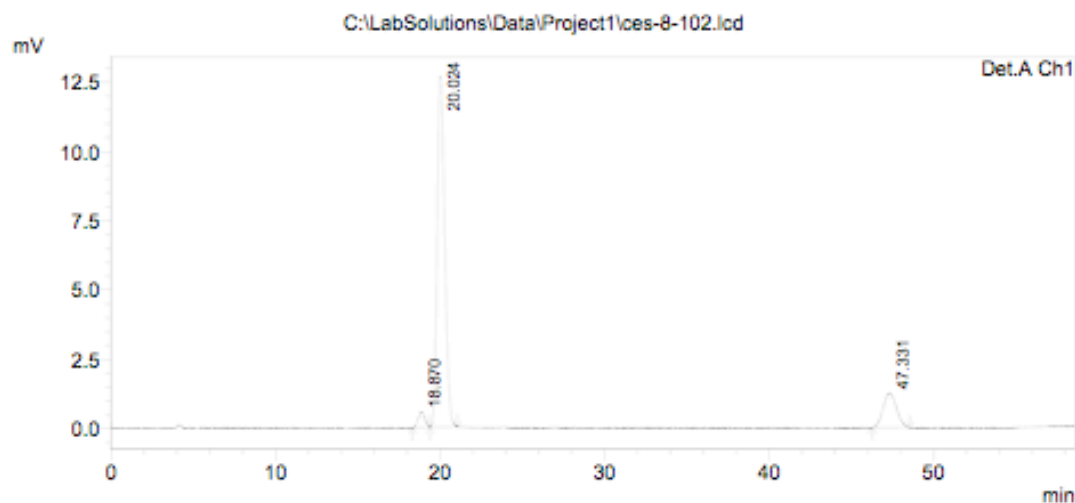

1 Det.A Ch1/215nm

PeakTable

Detector A Ch1 215nm

| Peak# | Ret. Time | Area   | Height | Area %  | Height % |
|-------|-----------|--------|--------|---------|----------|
| 1     | 18.870    | 16219  | 566    | 3.312   | 3.916    |
| 2     | 20.024    | 402088 | 12647  | 82.106  | 87.449   |
| 3     | 47.331    | 71413  | 1249   | 14.582  | 8.635    |
| Total |           | 489719 | 14462  | 100.000 | 100.000  |

C:\LabSolutions\Data\Project1\ces-8-102.lcd

5/27/2011 11:57:32 1 / 1

## ==== Shimadzu LCsolution Analysis Report ====

C:\LabSolutions\Data\Project1\ces-8-100-03.lcd

Acquired by : Admin  
 Sample Name : ces-8-100-2  
 Sample ID : ces-8-100-2  
 Vial # :  
 Injection Volume : 10 uL  
 Data File Name : ces-8-100-03.lcd  
 Method File Name : ces-OJ-H-analytical 0.46cm x 25 cm.lcm  
 Batch File Name :  
 Report File Name : Default.lcr  
 Data Acquired : 5/4/2011 11:58:48 AM  
 Data Processed : 5/4/2011 4:17:51 PM

### <Chromatogram>

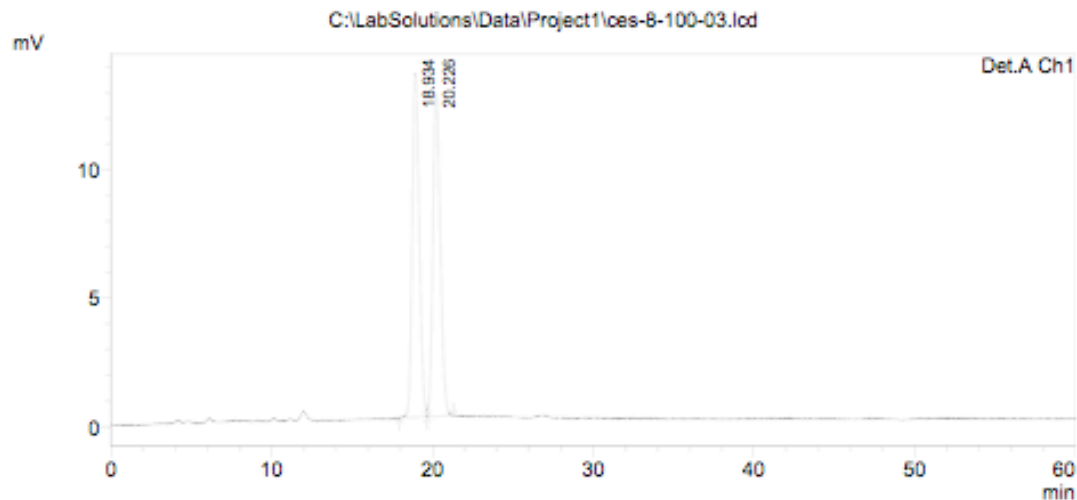

1 Det.A Ch1/215nm

PeakTable

Detector A Ch1 215nm

| Peak# | Ret. Time | Area   | Height | Area %  | Height % |
|-------|-----------|--------|--------|---------|----------|
| 1     | 18.934    | 407827 | 13393  | 50.253  | 51.653   |
| 2     | 20.226    | 403714 | 12536  | 49.747  | 48.347   |
| Total |           | 811541 | 25929  | 100.000 | 100.000  |

C:\LabSolutions\Data\Project1\ces-8-100-03.lcd

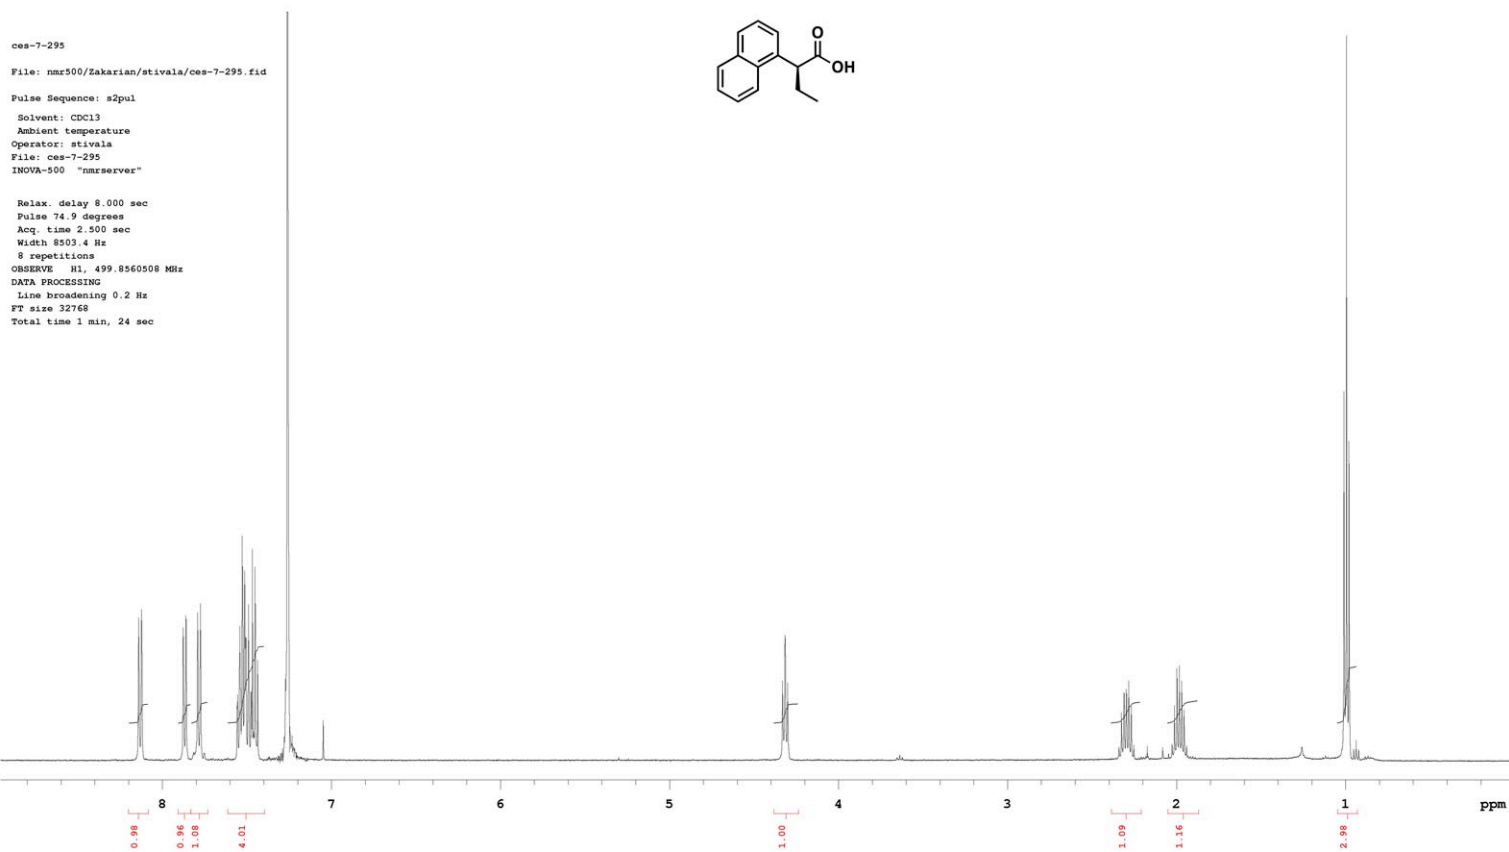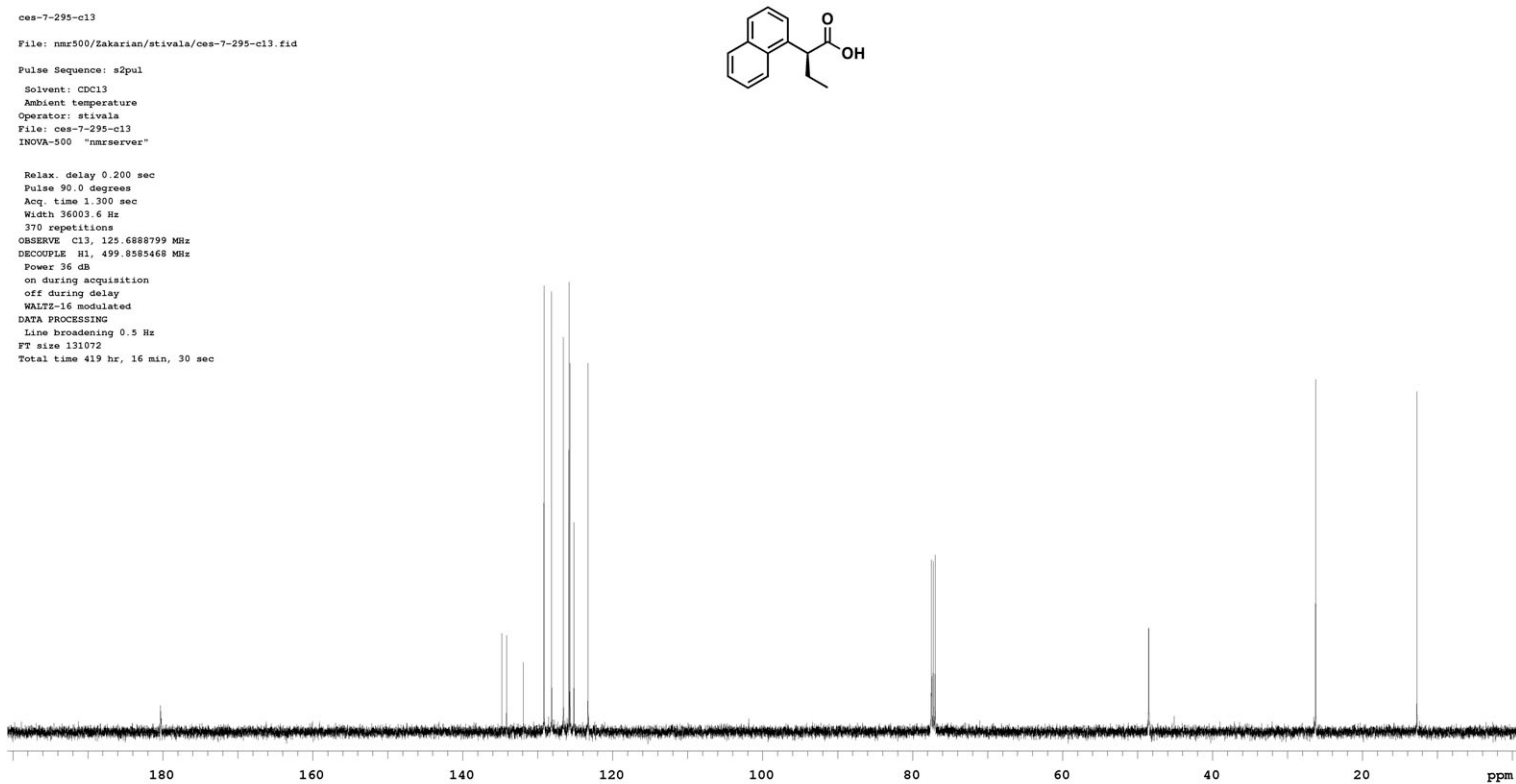

5/27/2011 10:06:49 1 / 1

## ==== Shimadzu LCsolution Analysis Report ====

C:\LabSolutions\Data\Project1\ces-7-295.lcd

Acquired by : Admin  
 Sample Name : ces-7-295  
 Sample ID : ces-7-295  
 Vial # :  
 Injection Volume : 20 uL  
 Data File Name : ces-7-295.lcd  
 Method File Name : ces-OD-H-analytical.lcm  
 Batch File Name :  
 Report File Name : Default.lcr  
 Data Acquired : 3/22/2011 1:22:28 PM  
 Data Processed : 3/22/2011 6:31:18 PM

### <Chromatogram>

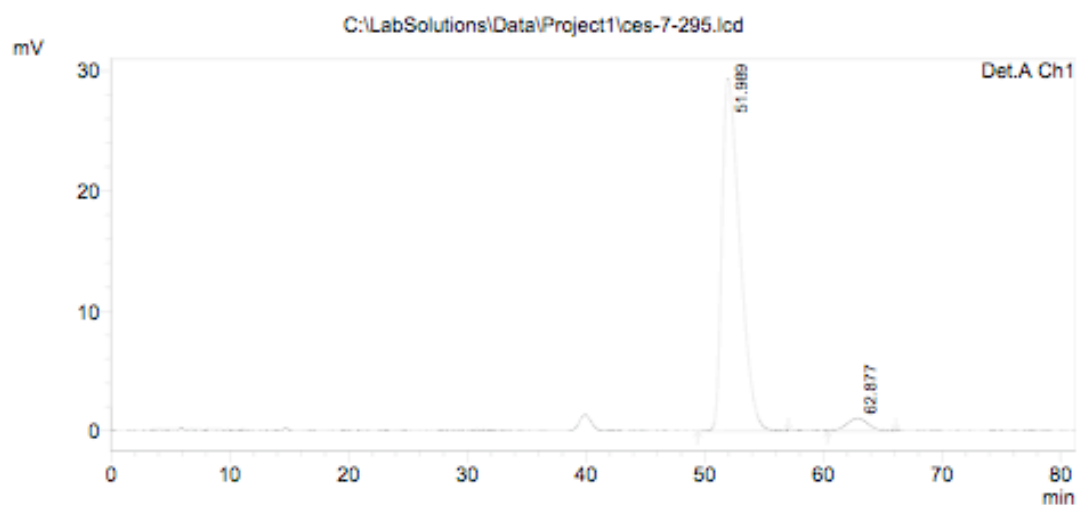

PeakTable

Detector A Ch1 215nm

| Peak# | Ret. Time | Area    | Height | Area %  | Height % |
|-------|-----------|---------|--------|---------|----------|
| 1     | 51.989    | 3091074 | 29365  | 95.933  | 96.514   |
| 2     | 62.877    | 131052  | 1061   | 4.067   | 3.486    |
| Total |           | 3222126 | 30426  | 100.000 | 100.000  |

C:\LabSolutions\Data\Project1\ces-7-295.lcd

5/27/2011 11:35:33 1 / 1

## ==== Shimadzu LCsolution Analysis Report ====

C:\LabSolutions\Data\Project1\ces-7-296-02.lcd

Acquired by : Admin  
 Sample Name : ces-7-296  
 Sample ID : ces-7-296  
 Vial # :  
 Injection Volume : 20 uL  
 Data File Name : ces-7-296-02.lcd  
 Method File Name : ces-OD-H-analytical.lcm  
 Batch File Name :  
 Report File Name : Default.lcr  
 Data Acquired : 3/22/2011 2:54:14 PM  
 Data Processed : 3/22/2011 6:46:22 PM

### <Chromatogram>

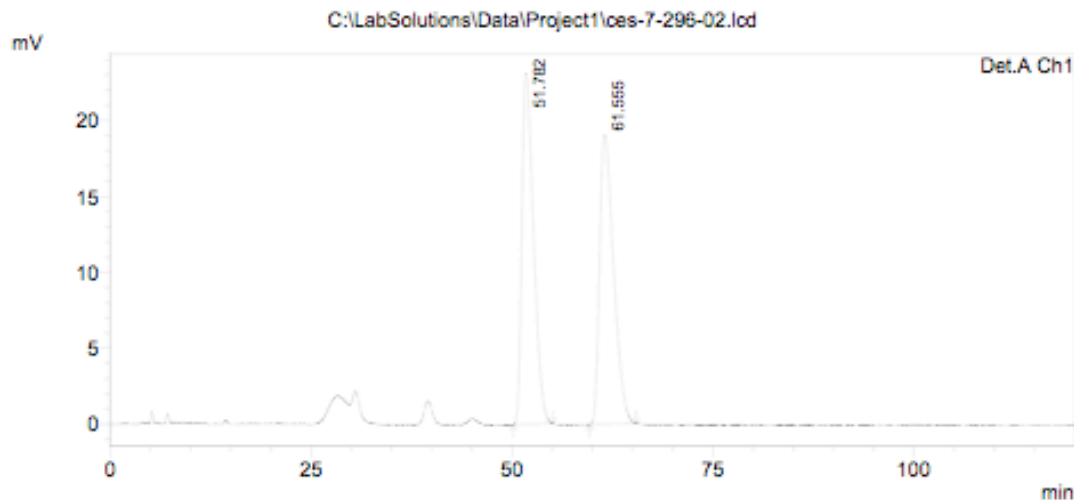

PeakTable

Detector A Ch1 215nm

| Peak# | Ret. Time | Area    | Height | Area %  | Height % |
|-------|-----------|---------|--------|---------|----------|
| 1     | 51.782    | 2333824 | 23122  | 50.209  | 54.787   |
| 2     | 61.555    | 2314372 | 19081  | 49.791  | 45.213   |
| Total |           | 4648196 | 42203  | 100.000 | 100.000  |

C:\LabSolutions\Data\Project1\ces-7-296-02.lcd

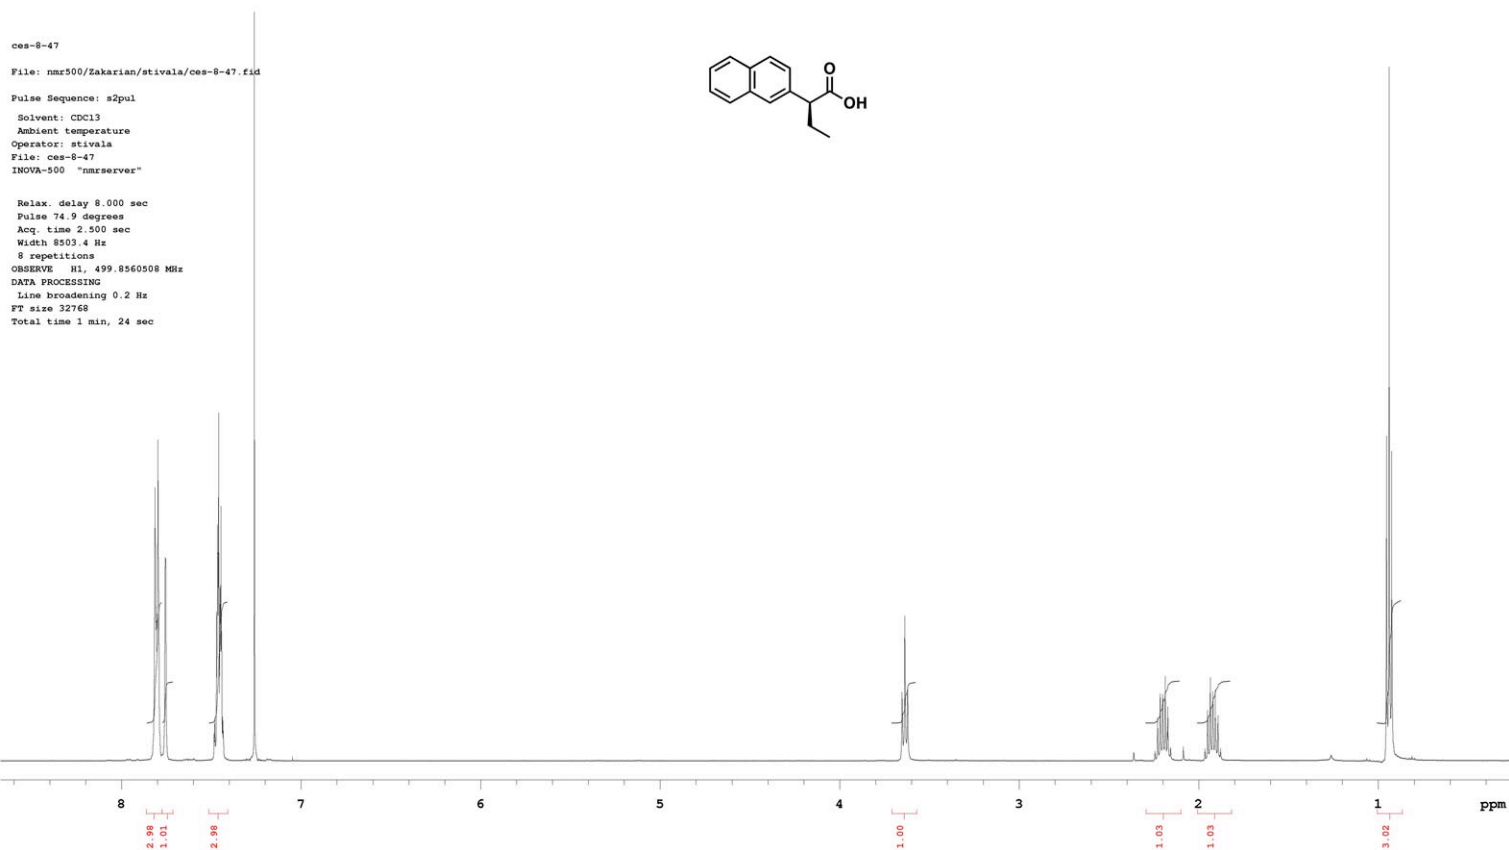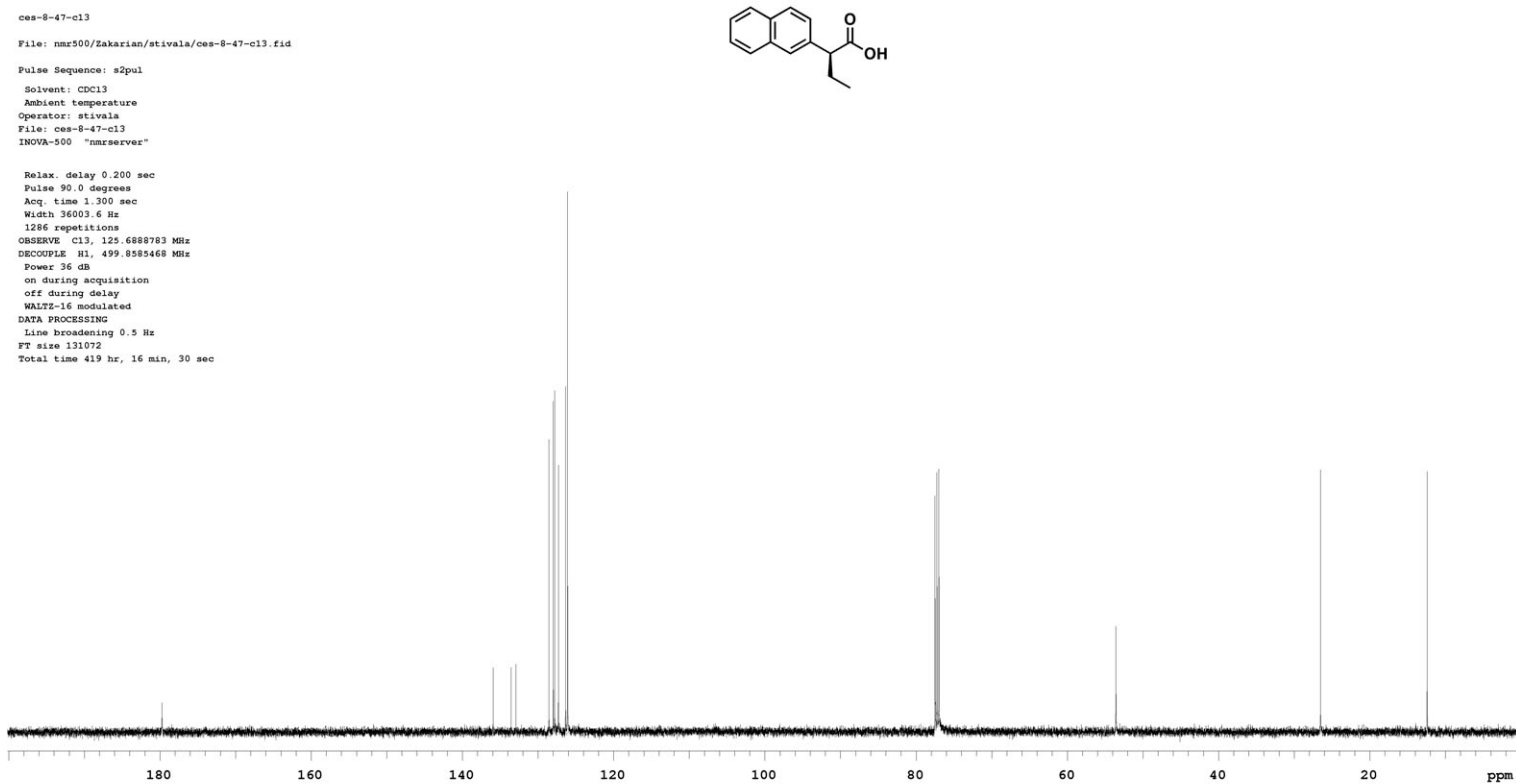

5/27/2011 10:07:26 1 / 1

## ==== Shimadzu LCsolution Analysis Report ====

C:\LabSolutions\Data\Project1\ces-8-47.lcd

Acquired by : Admin  
 Sample Name : ces-8-47  
 Sample ID : ces-8-47  
 Vial # :  
 Injection Volume : 20 uL  
 Data File Name : ces-8-47.lcd  
 Method File Name : ces-OD-H-analytical.lcm  
 Batch File Name :  
 Report File Name : Default.lcr  
 Data Acquired : 4/7/2011 8:13:52 PM  
 Data Processed : 4/7/2011 9:24:59 PM

### <Chromatogram>

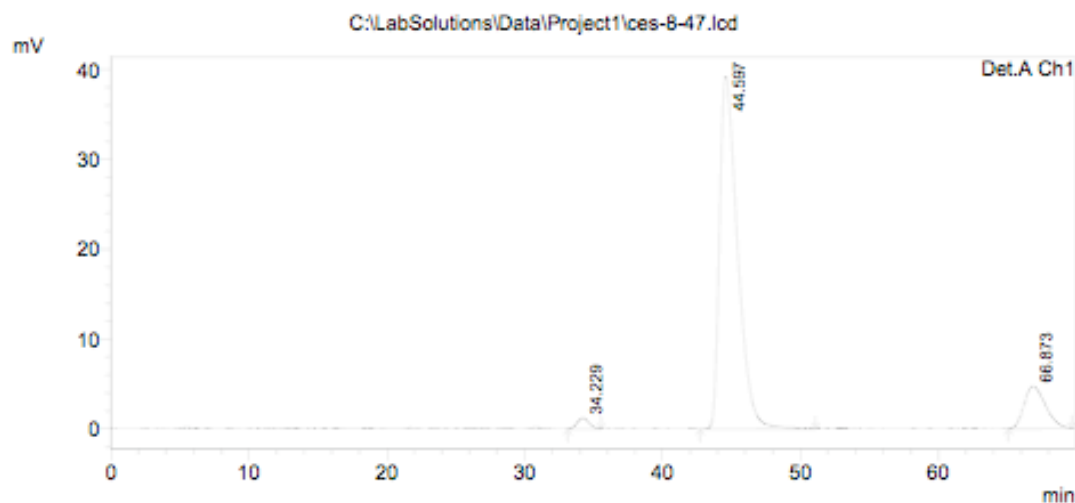

1 Det.A Ch1/215nm

PeakTable

Detector A Ch1 215nm

| Peak# | Ret. Time | Area    | Height | Area %  | Height % |
|-------|-----------|---------|--------|---------|----------|
| 1     | 34.229    | 74078   | 1212   | 1.787   | 2.683    |
| 2     | 44.597    | 3562882 | 39236  | 85.957  | 86.851   |
| 3     | 66.873    | 508000  | 4729   | 12.256  | 10.467   |
| Total |           | 4144959 | 45177  | 100.000 | 100.000  |

C:\LabSolutions\Data\Project1\ces-8-47.lcd



5/27/2011 11:33:46 1 / 1

## ==== Shimadzu LCsolution Analysis Report ====

C:\LabSolutions\Data\Project1\ces-8-48.lcd

Acquired by : Admin  
 Sample Name : ces-8-48  
 Sample ID : ces-8-48  
 Vial # :  
 Injection Volume : 20 uL  
 Data File Name : ces-8-48.lcd  
 Method File Name : ces-OD-H-analytical.lcm  
 Batch File Name :  
 Report File Name : Default.lcr  
 Data Acquired : 4/8/2011 10:02:55 AM  
 Data Processed : 4/8/2011 12:46:36 PM

### <Chromatogram>

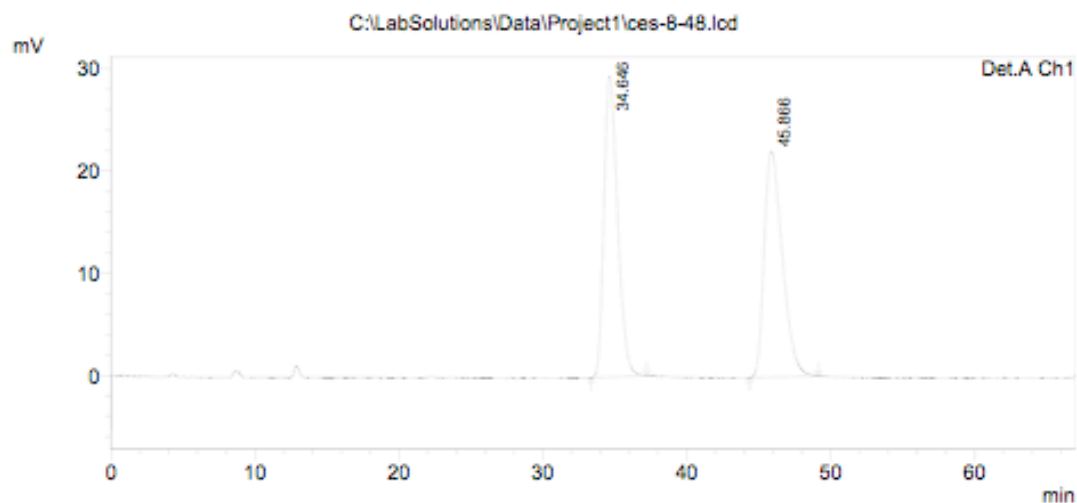

1 Det.A Ch1/215nm

PeakTable

| Peak# | Ret. Time | Area    | Height | Area %  | Height % |
|-------|-----------|---------|--------|---------|----------|
| 1     | 34.646    | 1940019 | 29406  | 49.972  | 57.087   |
| 2     | 45.866    | 1942174 | 22104  | 50.028  | 42.913   |
| Total |           | 3882193 | 51510  | 100.000 | 100.000  |

C:\LabSolutions\Data\Project1\ces-8-48.lcd

ces-8-35  
 File: nmr500/Zakarian/stivala/ces-8-35.fid  
 Pulse Sequence: s2pul  
 Solvent: CDCl3  
 Ambient temperature  
 Operator: stivala  
 File: ces-8-35  
 INOVA-500 "nmrserver"

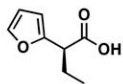

Relax. delay 8.000 sec  
 Pulse 74.9 degrees  
 Acq. time 2.500 sec  
 Width 8503.4 Hz  
 8 repetitions  
 OBSERVE H1, 499.8560508 MHz  
 DATA PROCESSING  
 Line broadening 0.2 Hz  
 FT size 32768  
 Total time 1 min, 24 sec

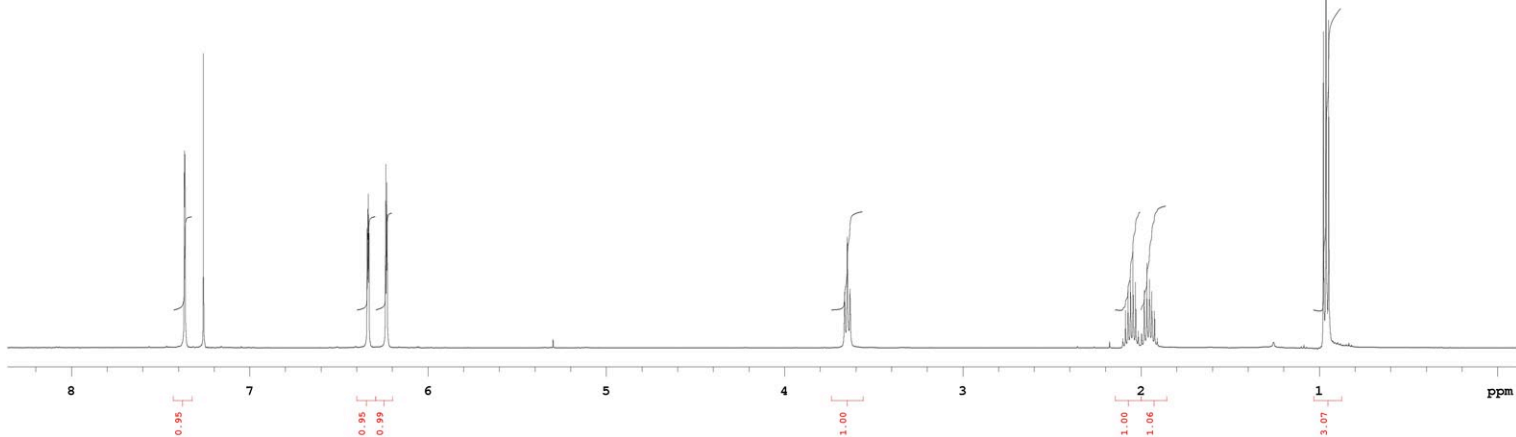

ces-8-35-cl3  
 File: nmr500/Zakarian/stivala/ces-8-35-cl3.fid  
 Pulse Sequence: s2pul  
 Solvent: CDCl3  
 Ambient temperature  
 Operator: stivala  
 File: ces-8-35-cl3  
 INOVA-500 "nmrserver"

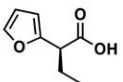

Relax. delay 0.200 sec  
 Pulse 90.0 degrees  
 Acq. time 1.300 sec  
 Width 36003.6 Hz  
 227 repetitions  
 OBSERVE C13, 125.6889783 MHz  
 DECOUPLE H1, 499.853468 MHz  
 Power 36 dB  
 on during acquisition  
 off during delay  
 WALTZ-16 modulated  
 DATA PROCESSING  
 Line broadening 0.5 Hz  
 FT size 131072  
 Total time 419 hr, 16 min, 30 sec

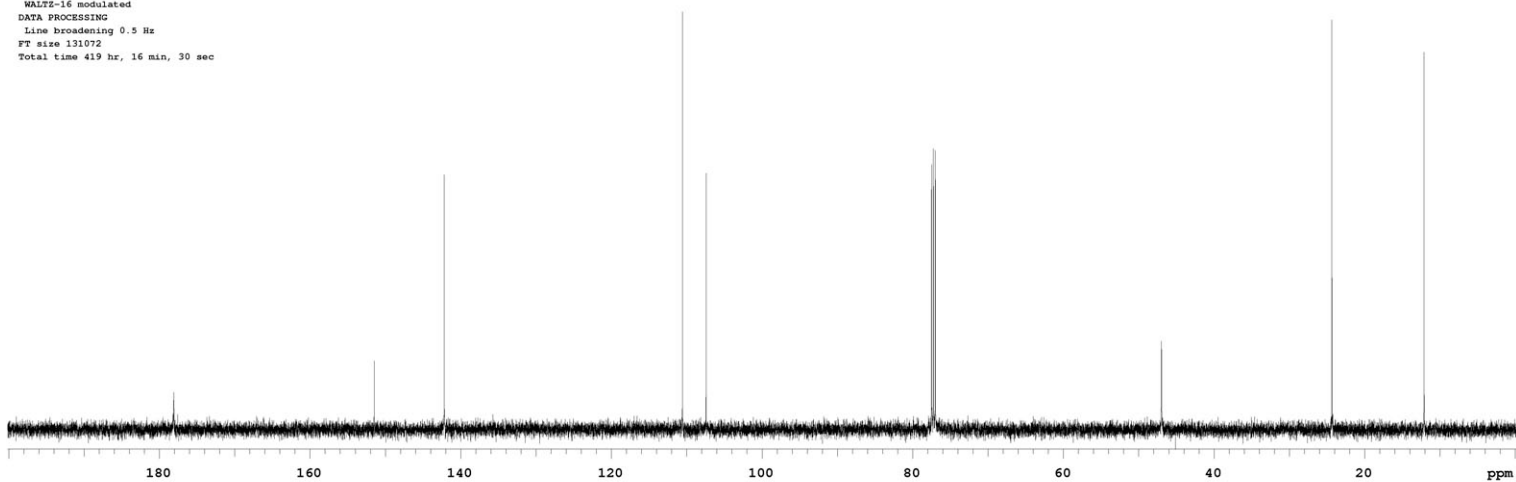

5/27/2011 10:08:10 1 / 1

## ==== Shimadzu LCsolution Analysis Report ====

C:\LabSolutions\Data\Project1\ces-8-35.lcd

Acquired by : Admin  
 Sample Name : ces-8-35  
 Sample ID : ces-8-35  
 Vial # :  
 Injection Volume : 20 uL  
 Data File Name : ces-8-35.lcd  
 Method File Name : ces-OD-H-analytical.lcm  
 Batch File Name :  
 Report File Name : Default.lcr  
 Data Acquired : 4/5/2011 8:50:10 PM  
 Data Processed : 4/5/2011 7:25:22 PM

### <Chromatogram>

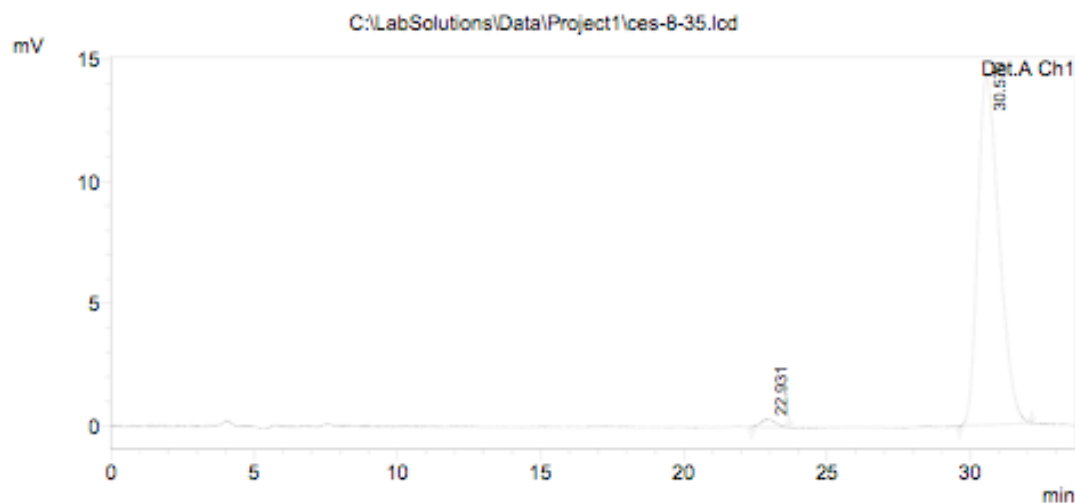

PeakTable

Detector A Ch1 215nm

| Peak# | Ret. Time | Area   | Height | Area %  | Height % |
|-------|-----------|--------|--------|---------|----------|
| 1     | 22.931    | 11482  | 317    | 1.522   | 2.176    |
| 2     | 30.570    | 742825 | 14257  | 98.478  | 97.824   |
| Total |           | 754307 | 14575  | 100.000 | 100.000  |

C:\LabSolutions\Data\Project1\ces-8-35.lcd

5/27/2011 11:58:28 1 / 1

## ==== Shimadzu LCsolution Analysis Report ====

C:\LabSolutions\Data\Project1\ces-8-34.lcd

Acquired by : Admin  
 Sample Name : ces-8-34  
 Sample ID : ces-8-34  
 Vial # :  
 Injection Volume : 20 uL  
 Data File Name : ces-8-34.lcd  
 Method File Name : ces-OD-H-analytical.lcm  
 Batch File Name :  
 Report File Name : Default.lcr  
 Data Acquired : 4/5/2011 2:34:52 PM  
 Data Processed : 4/5/2011 3:52:34 PM

### <Chromatogram>

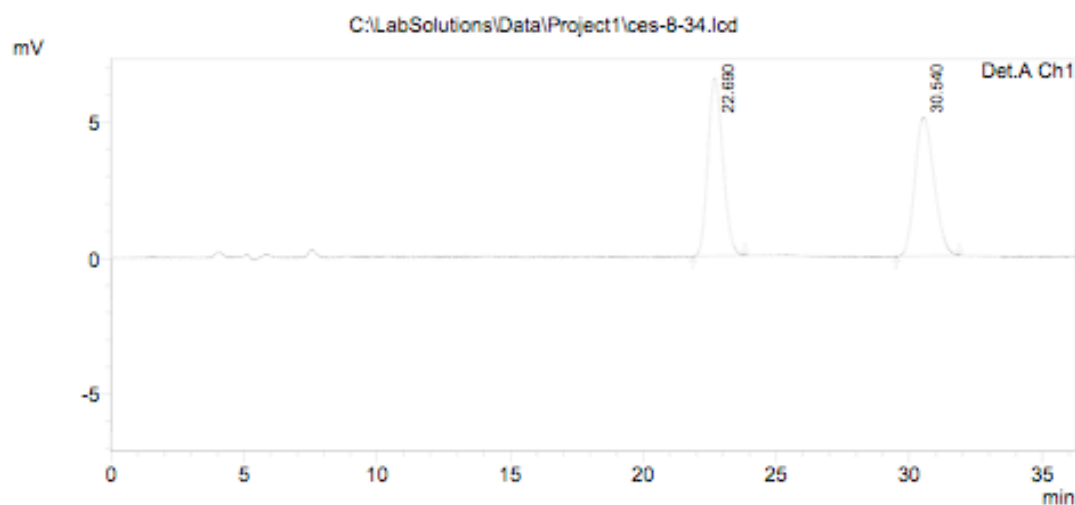

1 Det.A Ch1/215nm

PeakTable

Detector A Ch1 215nm

| Peak# | Ret. Time | Area   | Height | Area %  | Height % |
|-------|-----------|--------|--------|---------|----------|
| 1     | 22.690    | 256349 | 6535   | 50.018  | 56.172   |
| 2     | 30.540    | 256164 | 5099   | 49.982  | 43.828   |
| Total |           | 512513 | 11634  | 100.000 | 100.000  |

C:\LabSolutions\Data\Project1\ces-8-34.lcd

ces-8-103

File: nmr600/Zakarian/stivala/ces-8-103.fid

Pulse Sequence: s2pul  
 Solvent: cdcl3  
 Temp. 25.0 C / 298.1 K  
 Operator: stivala  
 File: ces-8-103  
 INOVA-500 "nmrserver"

Relax. delay 8.000 sec  
 Pulse 74.9 degrees  
 Acq. time 2.500 sec  
 Width 10000.0 Hz  
 8 repetitions  
 OBSERVE H1, 599.6321119 MHz  
 DATA PROCESSING  
 Line broadening 0.2 Hz  
 FT size 32768  
 Total time 1 min, 24 sec

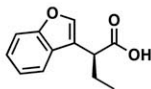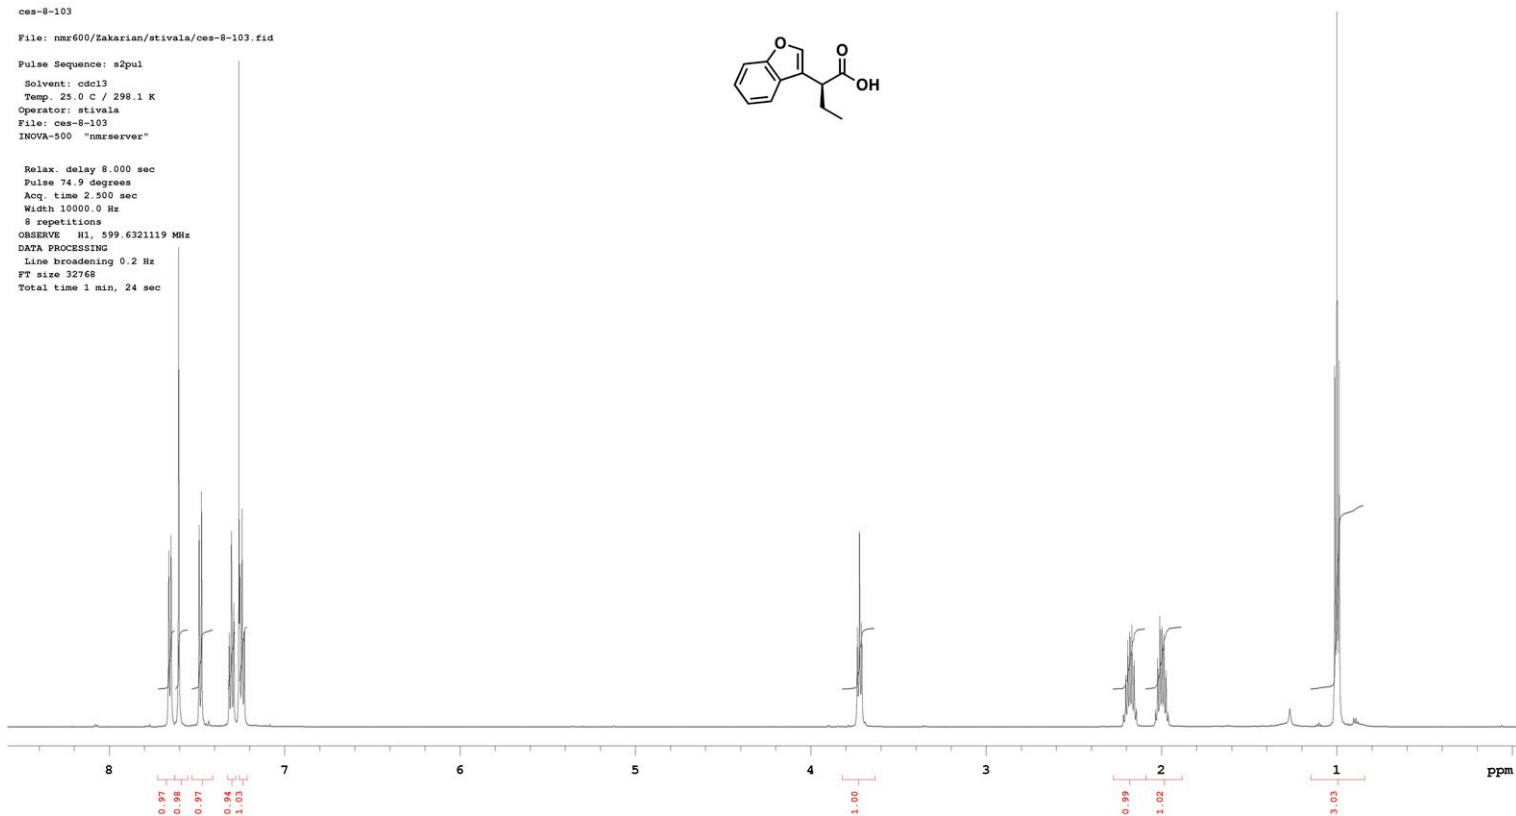

ces-8-103-c13

Sample: 1 Indanone  
 File: nmr600/Zakarian/stivala/ces-8-103-c13.fid

Pulse Sequence: s2pul  
 Solvent: cdcl3  
 Temp. 25.0 C / 298.1 K  
 Operator: stivala  
 File: ces-8-103-c13  
 INOVA-500 "nmrserver"

Relax. delay 1.000 sec  
 Pulse 10.0 usec  
 Acq. time 1.298 sec  
 Width 36231.9 Hz  
 408 repetitions  
 OBSERVE C13, 150.775820 MHz  
 DECOUPLE H1, 599.6381203 MHz  
 Power 34 dB  
 continuously on  
 WALTZ-16 modulated  
 DATA PROCESSING  
 Line broadening 0.5 Hz  
 FT size 131072  
 Total time 6 hr, 25 min, 1 sec

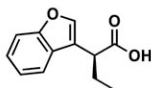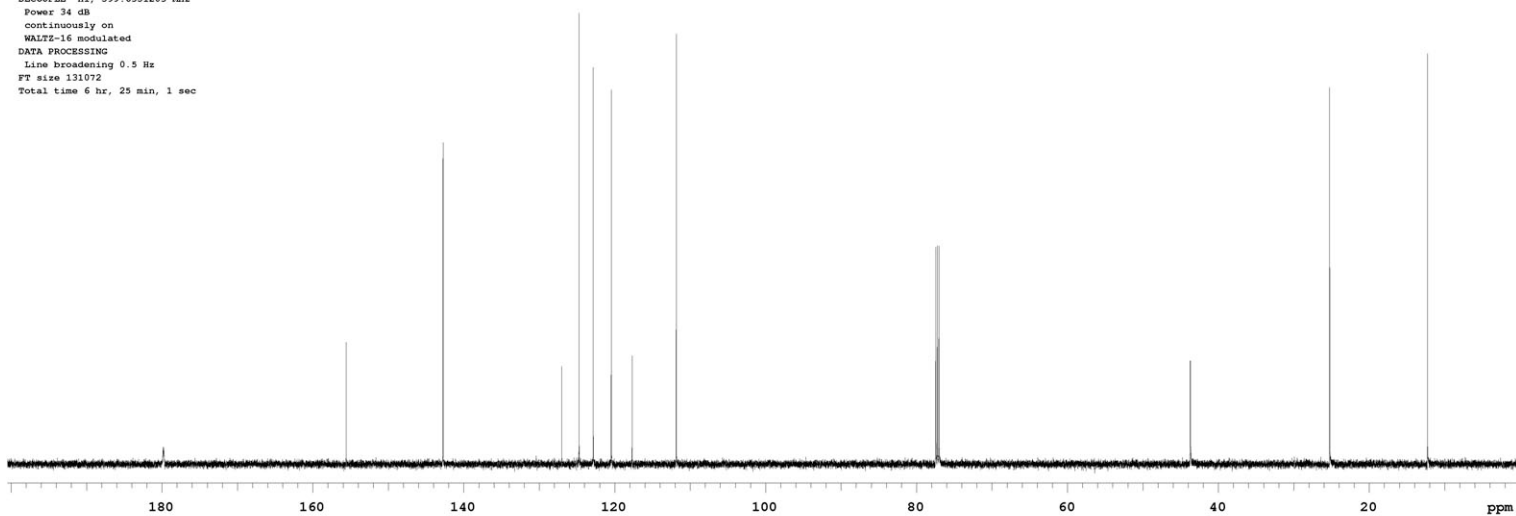

5/27/2011 10:08:54 1 / 1

## ==== Shimadzu LCsolution Analysis Report ====

C:\LabSolutions\Data\Project1\ces-8-103.lcd

Acquired by : Admin  
 Sample Name : ces-8-103  
 Sample ID : ces-8-103  
 Vial # :  
 Injection Volume : 20 uL  
 Data File Name : ces-8-103.lcd  
 Method File Name : ces-OD-H-analytical 0.46cm x 25cm.lcm  
 Batch File Name :  
 Report File Name : Default.lcr  
 Data Acquired : 5/6/2011 5:15:49 PM  
 Data Processed : 5/7/2011 7:26:22 PM

### <Chromatogram>

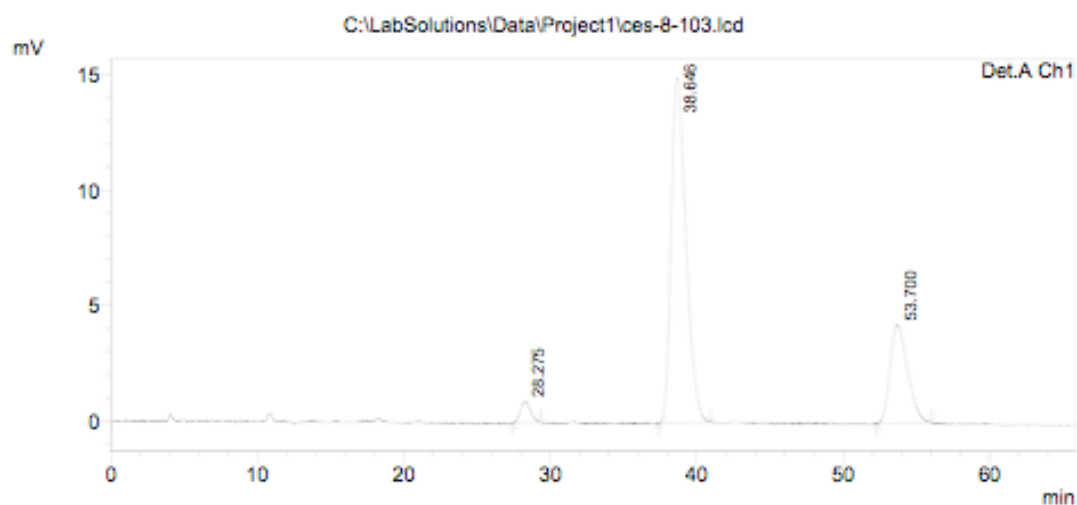

1 Det.A Ch1/215nm

PeakTable

Detector A Ch1 215nm

| Peak# | Ret. Time | Area    | Height | Area %  | Height % |
|-------|-----------|---------|--------|---------|----------|
| 1     | 28.275    | 44899   | 919    | 3.081   | 4.572    |
| 2     | 38.646    | 1054661 | 14915  | 72.378  | 74.218   |
| 3     | 53.700    | 357605  | 4262   | 24.541  | 21.211   |
| Total |           | 1457165 | 20096  | 100.000 | 100.000  |

C:\LabSolutions\Data\Project1\ces-8-103.lcd

5/27/2011 12:06:29 1 / 1

## ==== Shimadzu LCsolution Analysis Report ====

C:\LabSolutions\Data\Project1\ces-8-104.lcd

Acquired by : Admin  
 Sample Name : ces-8-104  
 Sample ID : ces-8-104  
 Vial # :  
 Injection Volume : 20 uL  
 Data File Name : ces-8-104.lcd  
 Method File Name : ces-OD-H-analytical 0.46cm x 25cm.lcm  
 Batch File Name :  
 Report File Name : Default.lcr  
 Data Acquired : 5/6/2011 3:22:33 PM  
 Data Processed : 5/27/2011 11:59:39 AM

### <Chromatogram>

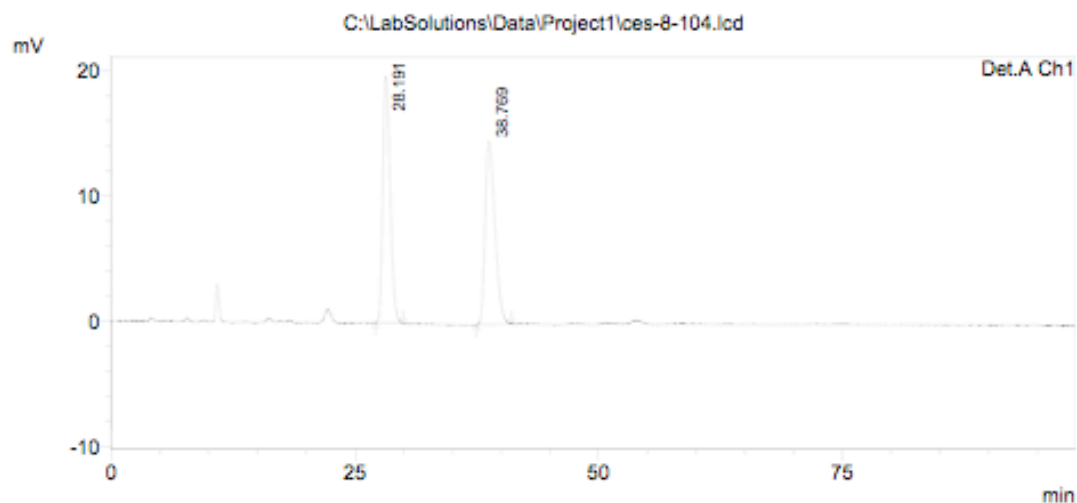

PeakTable

Detector A Ch1 215nm

| Peak# | Ret. Time | Area    | Height | Area %  | Height % |
|-------|-----------|---------|--------|---------|----------|
| 1     | 28.191    | 1027547 | 19679  | 49.975  | 57.412   |
| 2     | 38.769    | 1028575 | 14598  | 50.025  | 42.588   |
| Total |           | 2056122 | 34277  | 100.000 | 100.000  |

C:\LabSolutions\Data\Project1\ces-8-104.lcd

ces-8-54  
 Sample: 1\_Indanone  
 File: nmr600/Zakarian/stivala/ces-8-54-.fid  
 Pulse Sequence: s2pul  
 Solvent: cdcl3  
 Temp. 25.0 C / 298.1 K  
 Operator: stivala  
 File: ces-8-54-  
 INOVA-500 "nmrserver"  
 Relax. delay 8.000 sec  
 Pulse 74.9 degrees  
 Acq. time 2.500 sec  
 Width 10000.0 Hz  
 8 repetitions  
 OBSERVE H1, 599.6321119 MHz  
 DATA PROCESSING  
 Line broadening 0.2 Hz  
 FT size 32768  
 Total time 1 min, 24 sec

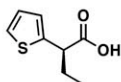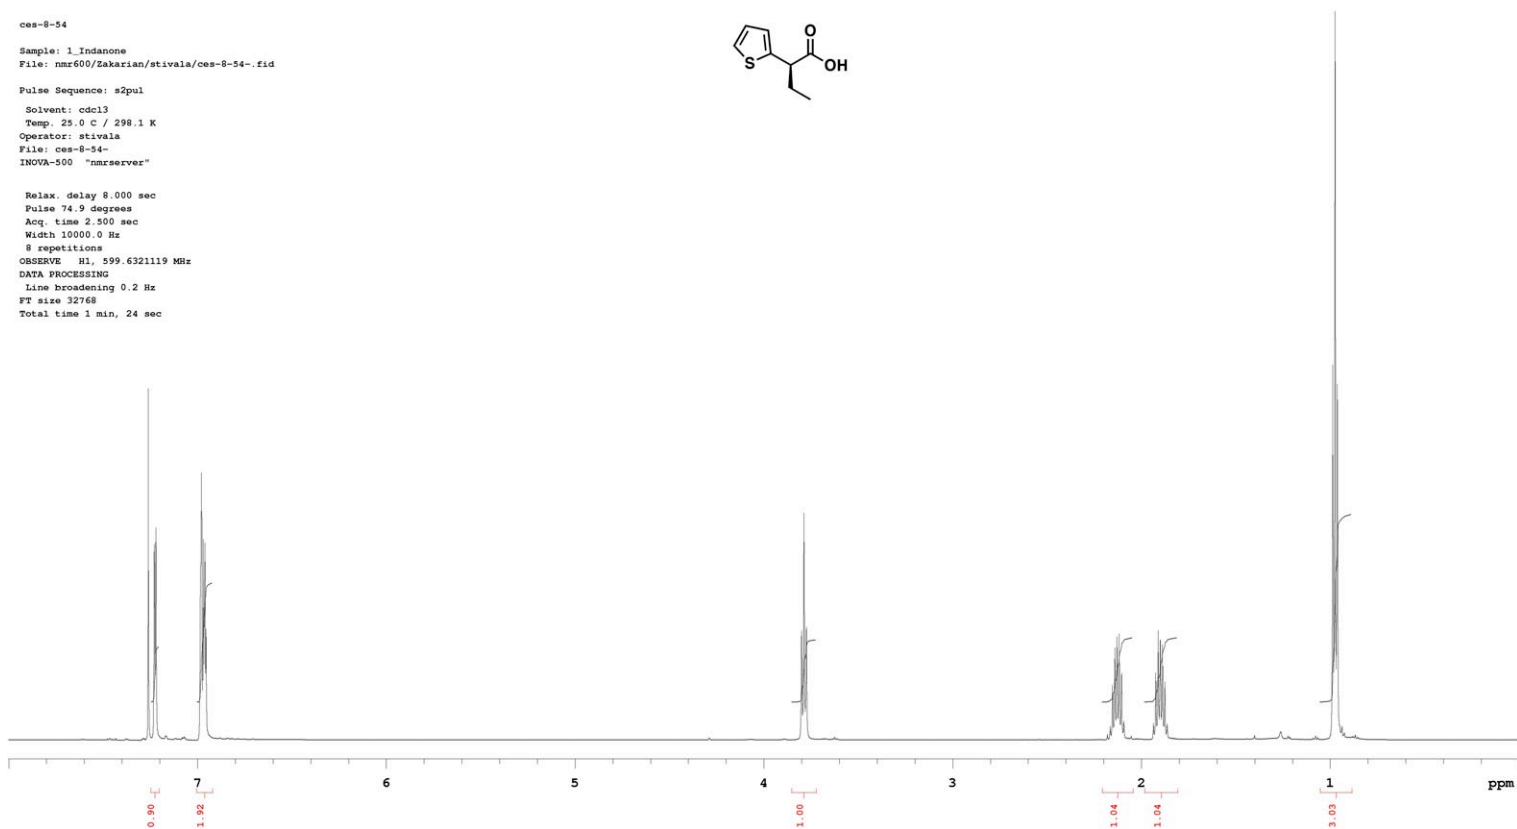

ces-8-54-cl3  
 Sample: 1\_Indanone  
 File: nmr600/Zakarian/stivala/ces-8-54-cl3.fid  
 Pulse Sequence: s2pul  
 Solvent: cdcl3  
 Temp. 25.0 C / 298.1 K  
 Operator: stivala  
 File: ces-8-54-cl3  
 INOVA-500 "nmrserver"  
 Relax. delay 1.000 sec  
 Pulse 10.0 usec  
 Acq. time 1.298 sec  
 Width 36231.9 Hz  
 230 repetitions  
 OBSERVE C13, 150.7775809 MHz  
 DECOUPLE H1, 599.6381203 MHz  
 Power 34 dB  
 continuously on  
 WALTZ-16 modulated  
 DATA PROCESSING  
 Line broadening 0.5 Hz  
 FT size 131072  
 Total time 6 hr, 25 min, 1 sec

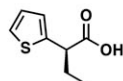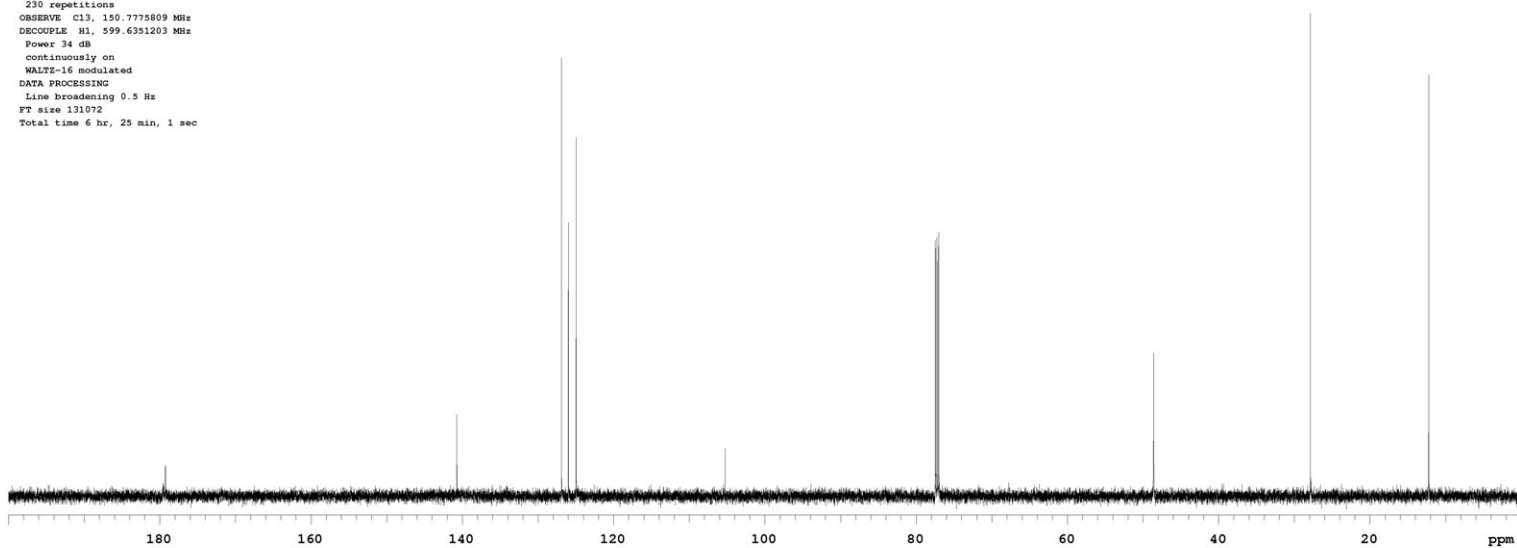



5/27/2011 10:09:35 1 / 1

## ==== Shimadzu LCsolution Analysis Report ====

C:\LabSolutions\Data\Project1\ces-8-54.lcd

Acquired by : Admin  
 Sample Name : ces-8-54  
 Sample ID : ces-8-54  
 Vial # :  
 Injection Volume : 20 uL  
 Data File Name : ces-8-54.lcd  
 Method File Name : ces-OD-H-analytical 0.46cm x 25cm.lcm  
 Batch File Name :  
 Report File Name : Default.lcr  
 Data Acquired : 4/12/2011 12:47:51 PM  
 Data Processed : 4/12/2011 1:54:35 PM

### <Chromatogram>

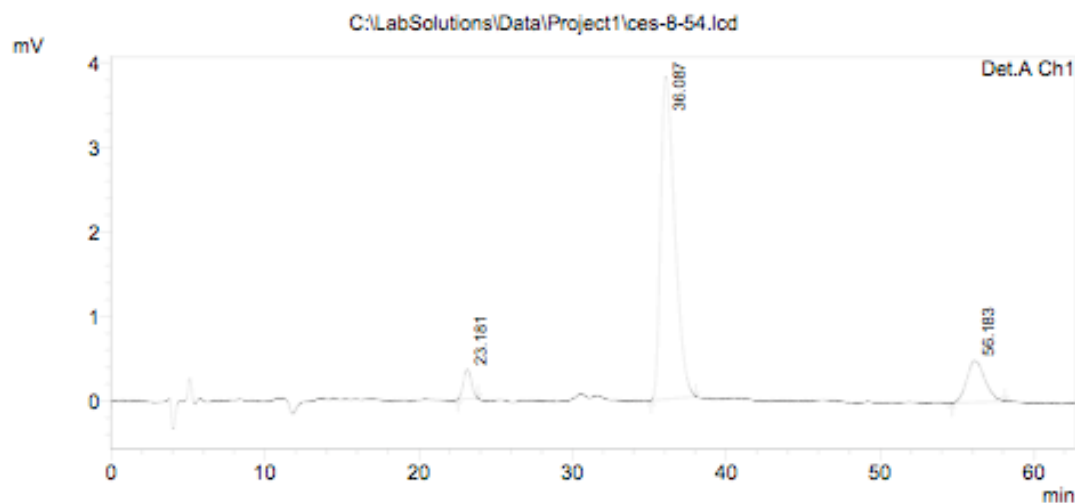

1 Det.A Ch1/215nm

PeakTable

Detector A Ch1 215nm

| Peak# | Ret. Time | Area   | Height | Area %  | Height % |
|-------|-----------|--------|--------|---------|----------|
| 1     | 23.181    | 12711  | 346    | 4.273   | 7.416    |
| 2     | 36.087    | 243923 | 3820   | 82.005  | 81.975   |
| 3     | 56.183    | 40815  | 494    | 13.722  | 10.609   |
| Total |           | 297449 | 4660   | 100.000 | 100.000  |

C:\LabSolutions\Data\Project1\ces-8-54.lcd

5/27/2011 12:00:38 1 / 1

## ==== Shimadzu LCsolution Analysis Report ====

C:\LabSolutions\Data\Project1\ces-8-52.lcd

|                  |                                         |
|------------------|-----------------------------------------|
| Acquired by      | : Admin                                 |
| Sample Name      | : ces-8-52                              |
| Sample ID        | : ces-8-52                              |
| Vial #           | :                                       |
| Injection Volume | : 20 uL                                 |
| Data File Name   | : ces-8-52.lcd                          |
| Method File Name | : ces-OD-H-analytical 0.46cm x 25cm.lcm |
| Batch File Name  | :                                       |
| Report File Name | : Default.lcr                           |
| Data Acquired    | : 4/11/2011 3:54:00 PM                  |
| Data Processed   | : 4/11/2011 4:40:56 PM                  |

## &lt;Chromatogram&gt;

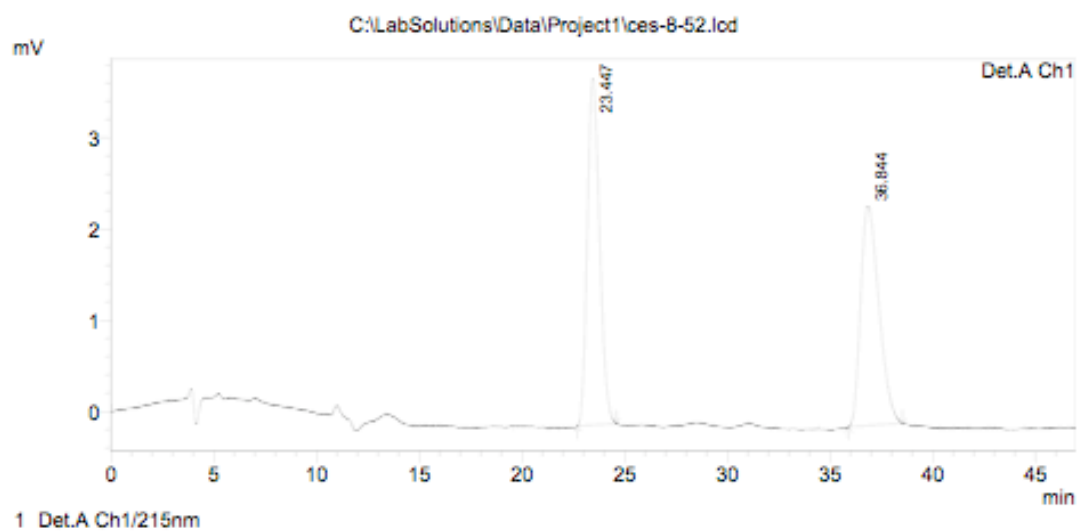

C:\LabSolutions\Data\Project1\ces-8-52.lcd

ces-8-107-r2  
 File: nmr600/Zakarian/stivala/ces-8-107-r2.fid  
 Pulse Sequence: s2pul  
 Solvent: cdcl3  
 Temp. 25.0 C / 298.1 K  
 Operator: stivala  
 File: ces-8-107-r2  
 INOVA-500 "nmrserver"

Relax. delay 8.000 sec  
 Pulse 74.9 degrees  
 Acq. time 2.500 sec  
 Width 10000.0 Hz  
 8 repetitions  
 OBSERVE H1, 599.6321119 MHz  
 DATA PROCESSING  
 Line broadening 0.2 Hz  
 FT size 32768  
 Total time 1 min, 24 sec

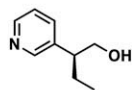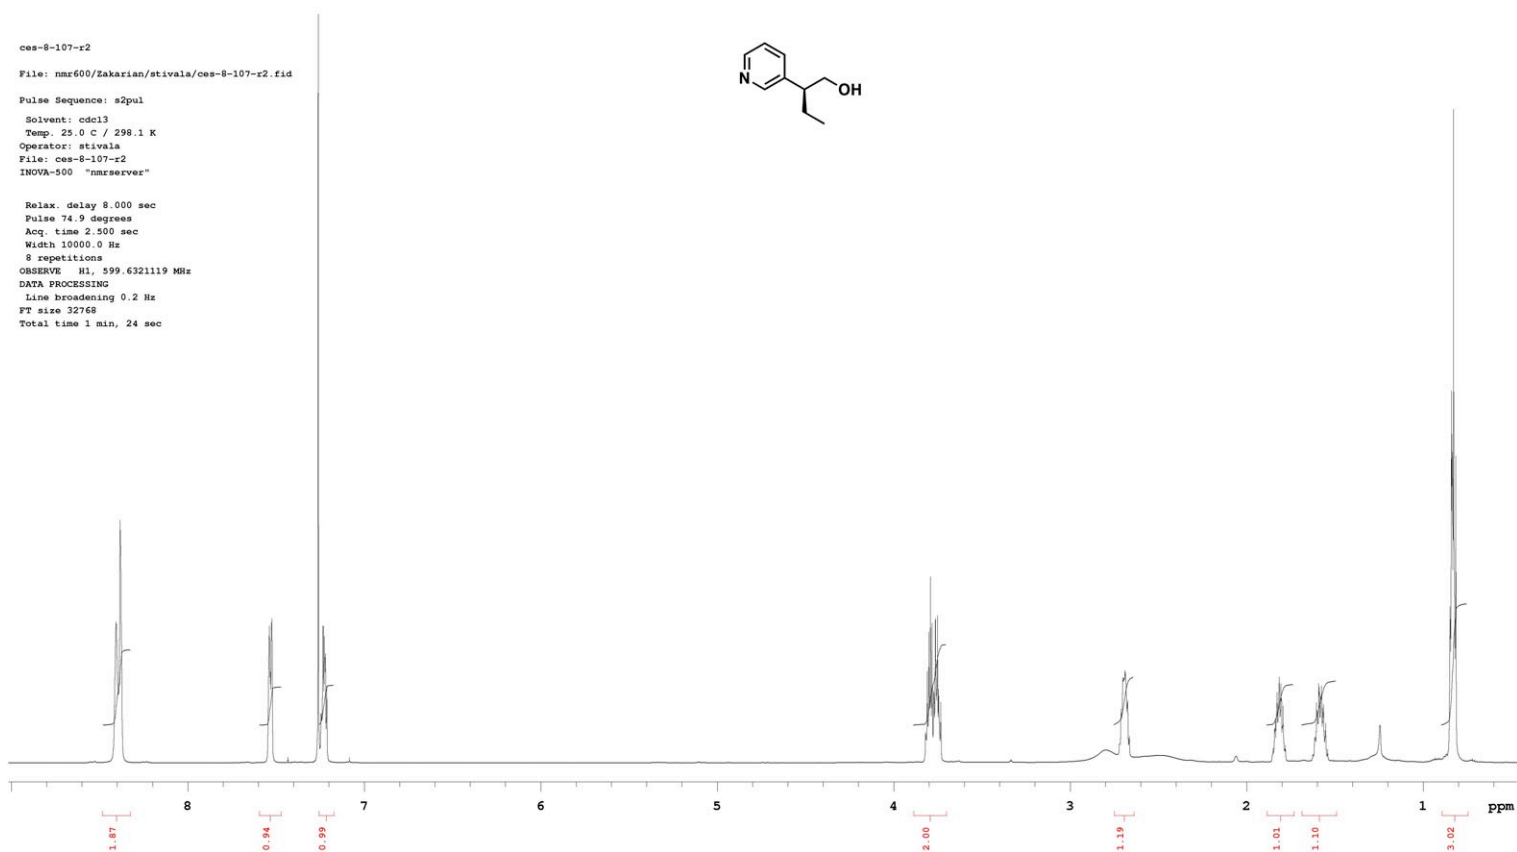

ces-8-107-r2-c13  
 Sample: 1 Indanone  
 File: nmr600/Zakarian/stivala/ces-8-107-r2-c13.fid  
 Pulse Sequence: s2pul  
 Solvent: cdcl3  
 Temp. 25.0 C / 298.1 K  
 Operator: stivala  
 File: ces-8-107-r2-c13  
 INOVA-500 "nmrserver"

Relax. delay 1.000 sec  
 Pulse 10.0 usec  
 Acq. time 1.298 sec  
 Width 36231.9 Hz  
 84 repetitions  
 OBSERVE C13, 150.775825 MHz  
 DECOUPLE H1, 599.6381203 MHz  
 Power 34 dB  
 continuously on  
 WALTZ-16 modulated  
 DATA PROCESSING  
 Line broadening 0.5 Hz  
 FT size 131072  
 Total time 6 hr, 25 min, 1 sec

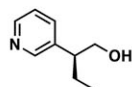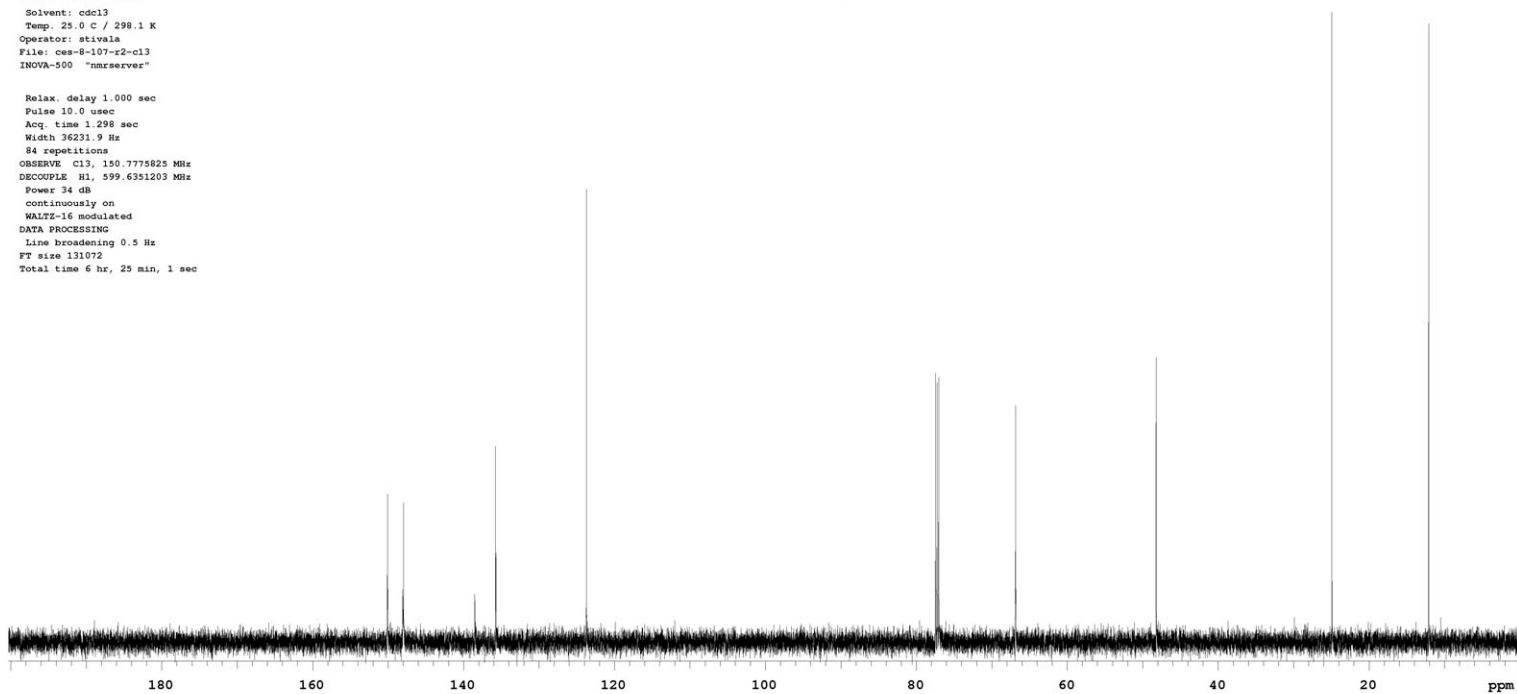

5/27/2011 10:10:04 1 / 1

## ==== Shimadzu LCsolution Analysis Report ====

C:\LabSolutions\Data\Project1\ces-8-107.lcd

Acquired by : Admin  
 Sample Name : ces-8-107  
 Sample ID : ces-8-107  
 Vial # :  
 Injection Volume : 20 uL  
 Data File Name : ces-8-107.lcd  
 Method File Name : ces-OD-H-analytical 0.46cm x 25cm.lcm  
 Batch File Name :  
 Report File Name : Default.lcr  
 Data Acquired : 5/11/2011 10:54:39 AM  
 Data Processed : 5/20/2011 3:08:05 PM

### <Chromatogram>

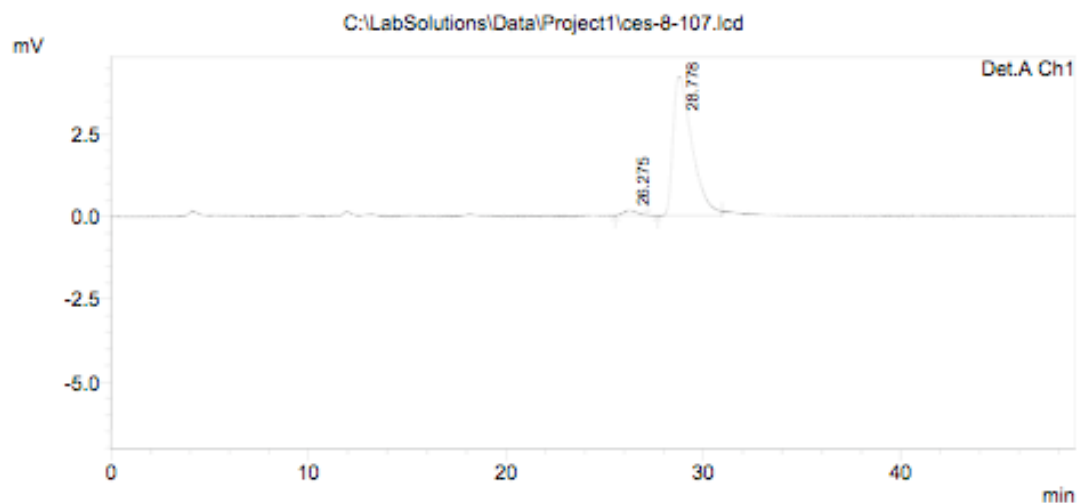

1 Det.A Ch1/248nm

PeakTable

| Peak# | Ret. Time | Area   | Height | Area %  | Height % |
|-------|-----------|--------|--------|---------|----------|
| 1     | 26.275    | 6917   | 149    | 2.375   | 3.409    |
| 2     | 28.778    | 284314 | 4229   | 97.625  | 96.591   |
| Total |           | 291231 | 4378   | 100.000 | 100.000  |

C:\LabSolutions\Data\Project1\ces-8-107.lcd

5/27/2011 12:01:47 1 / 1

## ==== Shimadzu LCsolution Analysis Report ====

C:\LabSolutions\Data\Project1\ces-8-108-03.lcd

Acquired by : Admin  
 Sample Name : ces-8-108  
 Sample ID : ces-8-108  
 Vial # :  
 Injection Volume : 25 uL  
 Data File Name : ces-8-108-03.lcd  
 Method File Name : ces-OD-H-analytical 0.46cm x 25cm.lcm  
 Batch File Name :  
 Report File Name : Default.lcr  
 Data Acquired : 5/21/2011 1:09:38 PM  
 Data Processed : 5/21/2011 1:48:33 PM

### <Chromatogram>

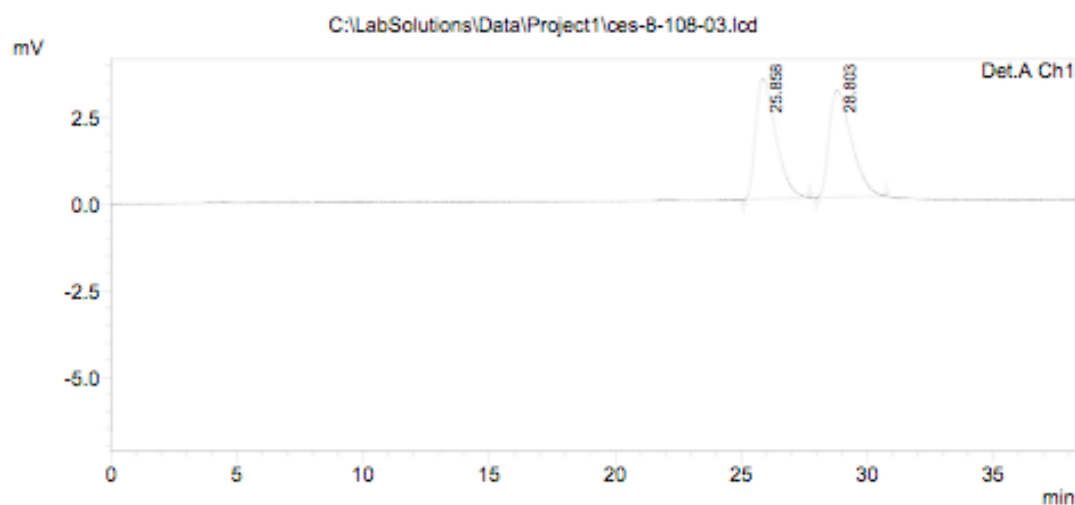

PeakTable

| Peak# | Ret. Time | Area   | Height | Area %  | Height % |
|-------|-----------|--------|--------|---------|----------|
| 1     | 25.858    | 193783 | 3488   | 50.215  | 52.935   |
| 2     | 28.803    | 192127 | 3101   | 49.785  | 47.065   |
| Total |           | 385911 | 6590   | 100.000 | 100.000  |

C:\LabSolutions\Data\Project1\ces-8-108-03.lcd

ces-8-26

File: nmr500/Zakarian/stivala/ces-8-26.fid

Pulse Sequence: s2pul

Solvent: CDCl3

Ambient temperature

Operator: stivala

File: ces-8-26

INOVA-500 "nmrserver"

Relax. delay 8.000 sec  
 Pulse 74.9 degrees  
 Acq. time 2.500 sec  
 Width 8503.4 Hz  
 8 repetitions  
 OBSERVE H1, 499.8560508 MHz  
 DATA PROCESSING  
 Line broadening 0.2 Hz  
 FT size 32768  
 Total time 1 min, 24 sec

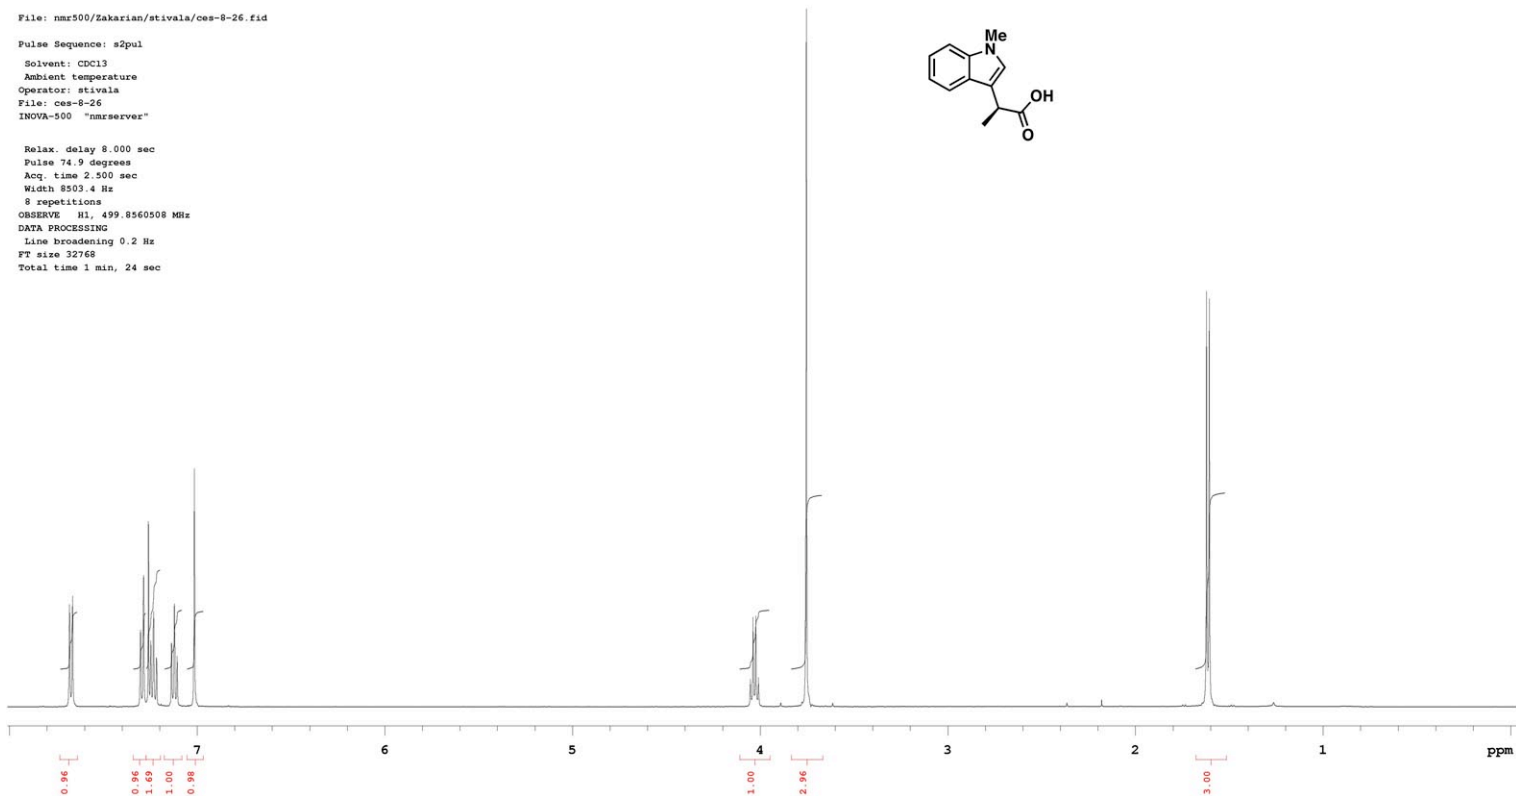

ces-8-26-cl3

File: nmr500/Zakarian/stivala/ces-8-26-cl3.fid

Pulse Sequence: s2pul

Solvent: CDCl3

Ambient temperature

Operator: stivala

File: ces-8-26-cl3

INOVA-500 "nmrserver"

Relax. delay 0.200 sec  
 Pulse 90.0 degrees  
 Acq. time 1.300 sec  
 Width 36003.6 Hz  
 879 repetitions  
 OBSERVE C13, 125.6888777 MHz  
 DECOUPLE H1, 499.8563468 MHz  
 Power 36 dB  
 on during acquisition  
 off during delay  
 WALTZ-16 modulated  
 DATA PROCESSING  
 Line broadening 0.5 Hz  
 FT size 131072  
 Total time 419 hr, 16 min, 30 sec

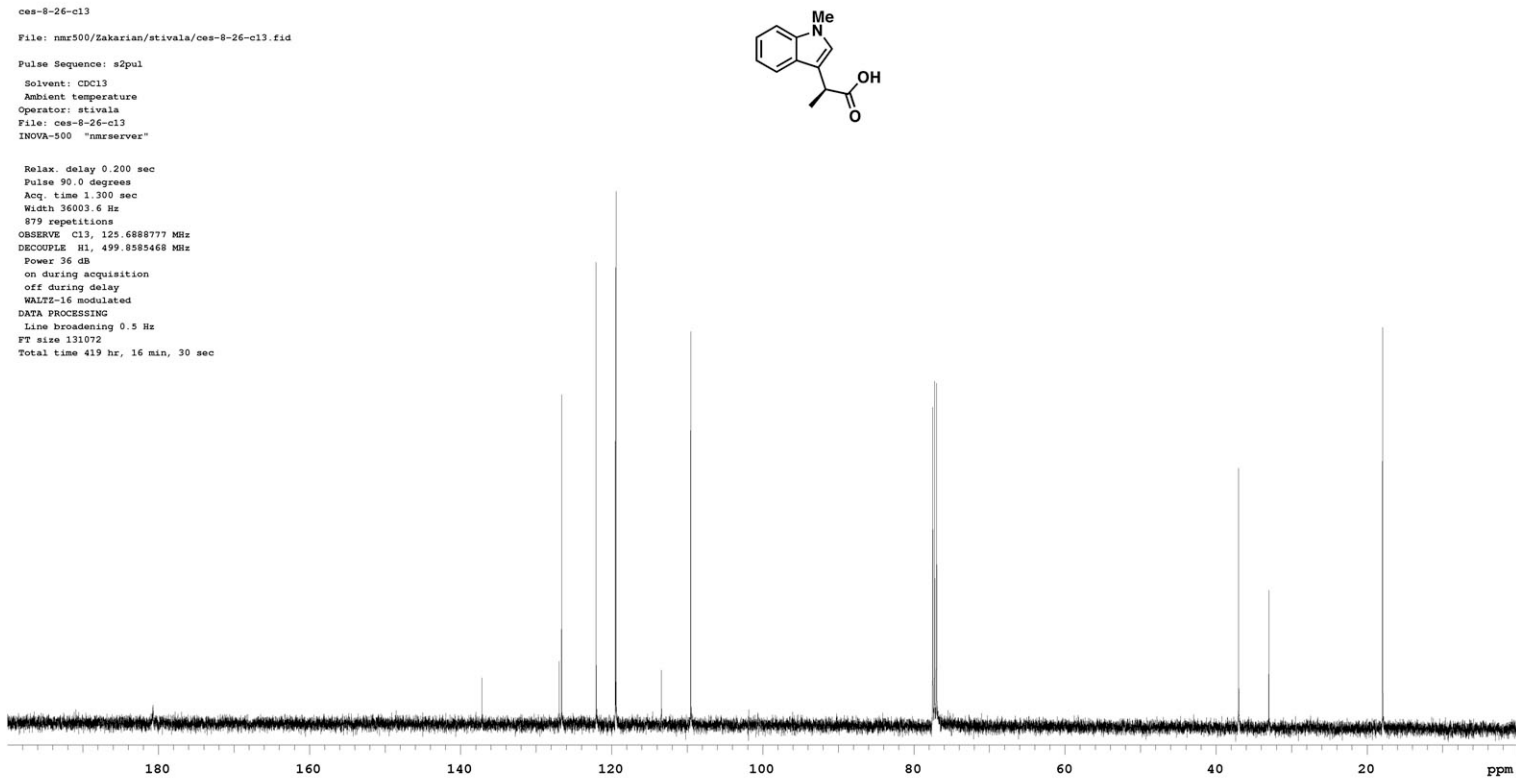

5/27/2011 10:11:45 1 / 1

## ==== Shimadzu LCsolution Analysis Report ====

C:\LabSolutions\Data\Project1\ces-8-26.lcd

Acquired by : Admin  
 Sample Name : ces-8-26  
 Sample ID : ces-8-26  
 Vial # :  
 Injection Volume : 20 uL  
 Data File Name : ces-8-26.lcd  
 Method File Name : ces-OD-H-analytical.lcm  
 Batch File Name :  
 Report File Name : Default.lcr  
 Data Acquired : 3/31/2011 7:21:50 PM  
 Data Processed : 4/4/2011 4:23:43 PM

### <Chromatogram>

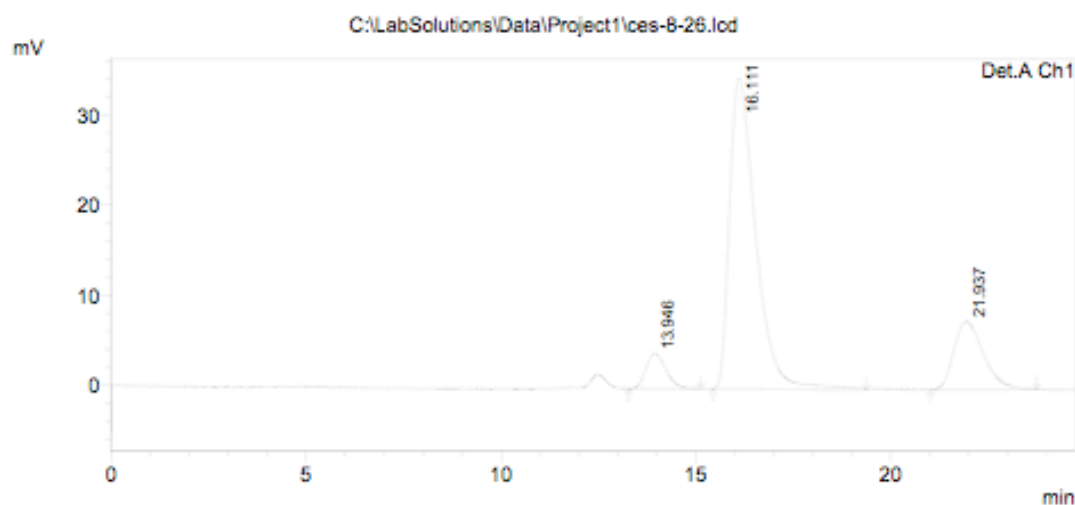

1 Det.A Ch1/215nm

PeakTable

Detector A Ch1 215nm

| Peak# | Ret. Time | Area    | Height | Area %  | Height % |
|-------|-----------|---------|--------|---------|----------|
| 1     | 13.946    | 140852  | 3896   | 6.557   | 8.482    |
| 2     | 16.111    | 1608333 | 34468  | 74.869  | 75.040   |
| 3     | 21.937    | 399003  | 7569   | 18.574  | 16.478   |
| Total |           | 2148187 | 45933  | 100.000 | 100.000  |

C:\LabSolutions\Data\Project1\ces-8-26.lcd

5/28/2011 11:37:30 1 / 1

## ==== Shimadzu LCsolution Analysis Report ====

C:\LabSolutions\Data\Project1\ces-7-294-03.lcd

Acquired by : Admin  
 Sample Name : ces-7-294  
 Sample ID : ces-7-294  
 Vial # :  
 Injection Volume : 25 uL  
 Data File Name : ces-7-294-03.lcd  
 Method File Name : ces-OD-H-analytical 0.46cm x 25cm.lcm  
 Batch File Name :  
 Report File Name : Default.lcr  
 Data Acquired : 5/28/2011 11:10:28 AM  
 Data Processed : 5/28/2011 11:36:44 AM

### <Chromatogram>

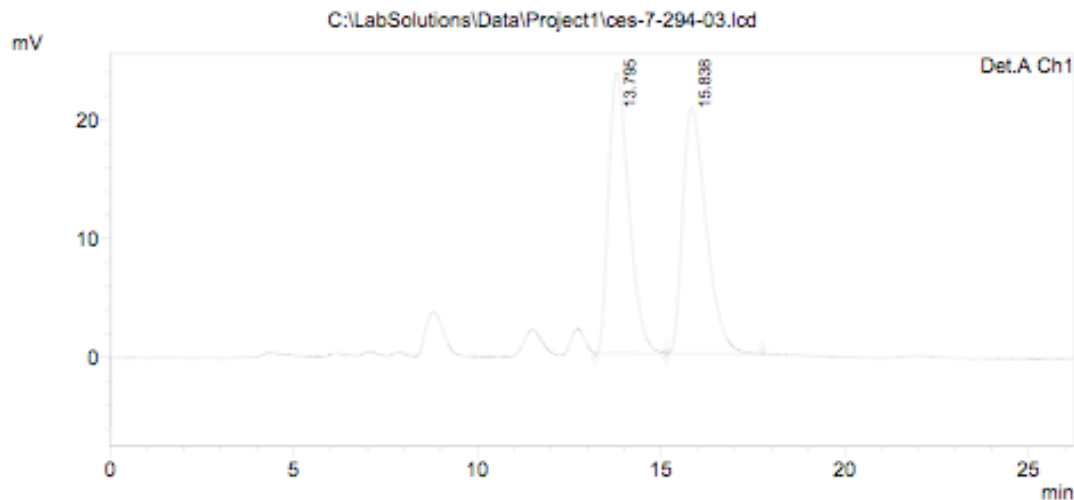

1 Det.A Ch1/215nm

PeakTable

Detector A Ch1 215nm

| Peak# | Ret. Time | Area    | Height | Area %  | Height % |
|-------|-----------|---------|--------|---------|----------|
| 1     | 13.795    | 910197  | 23583  | 49.602  | 53.266   |
| 2     | 15.838    | 924789  | 20692  | 50.398  | 46.734   |
| Total |           | 1834986 | 44275  | 100.000 | 100.000  |

C:\LabSolutions\Data\Project1\ces-7-294-03.lcd



ces-8-83  
 File: nmr600/Zakarian/stivala/ces-8-83.fid  
 Pulse Sequence: s2pul  
 Solvent: cdcl3  
 Temp. 25.0 C / 298.1 K  
 Operator: stivala  
 File: ces-8-83  
 INOVA-500 "nmrserver"

Relax. delay 8.000 sec  
 Pulse 74.9 degrees  
 Acq. time 2.500 sec  
 Width 10000.0 Hz  
 8 repetitions  
 OBSERVE H1, 599.6321119 MHz  
 DATA PROCESSING  
 Line broadening 0.2 Hz  
 FT size 32768  
 Total time 1 min, 24 sec

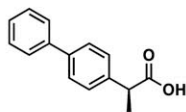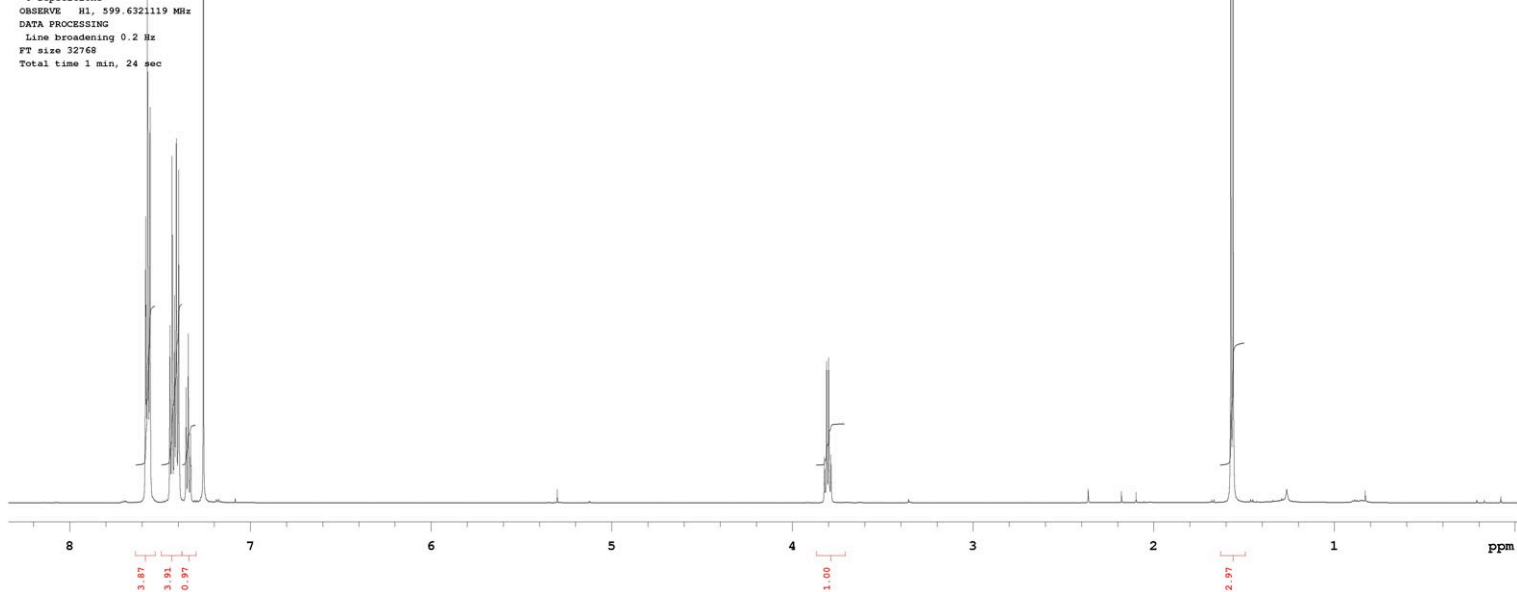

ces-8-83-cl3  
 Sample: 1 Indanone  
 File: nmr600/Zakarian/stivala/ces-8-83-cl3.fid  
 Pulse Sequence: s2pul  
 Solvent: cdcl3  
 Temp. 25.0 C / 298.1 K  
 Operator: stivala  
 File: ces-8-83-cl3  
 INOVA-500 "nmrserver"

Relax. delay 1.000 sec  
 Pulse 10.0 usec  
 Acq. time 1.298 sec  
 Width 36231.9 Hz  
 283 repetitions  
 OBSERVE C13, 150.7775809 MHz  
 DECOUPLE H1, 599.6381203 MHz  
 Power 34 dB  
 continuously on  
 WALTZ-16 modulated  
 DATA PROCESSING  
 Line broadening 0.5 Hz  
 FT size 131072  
 Total time 6 hr, 25 min, 1 sec

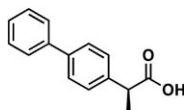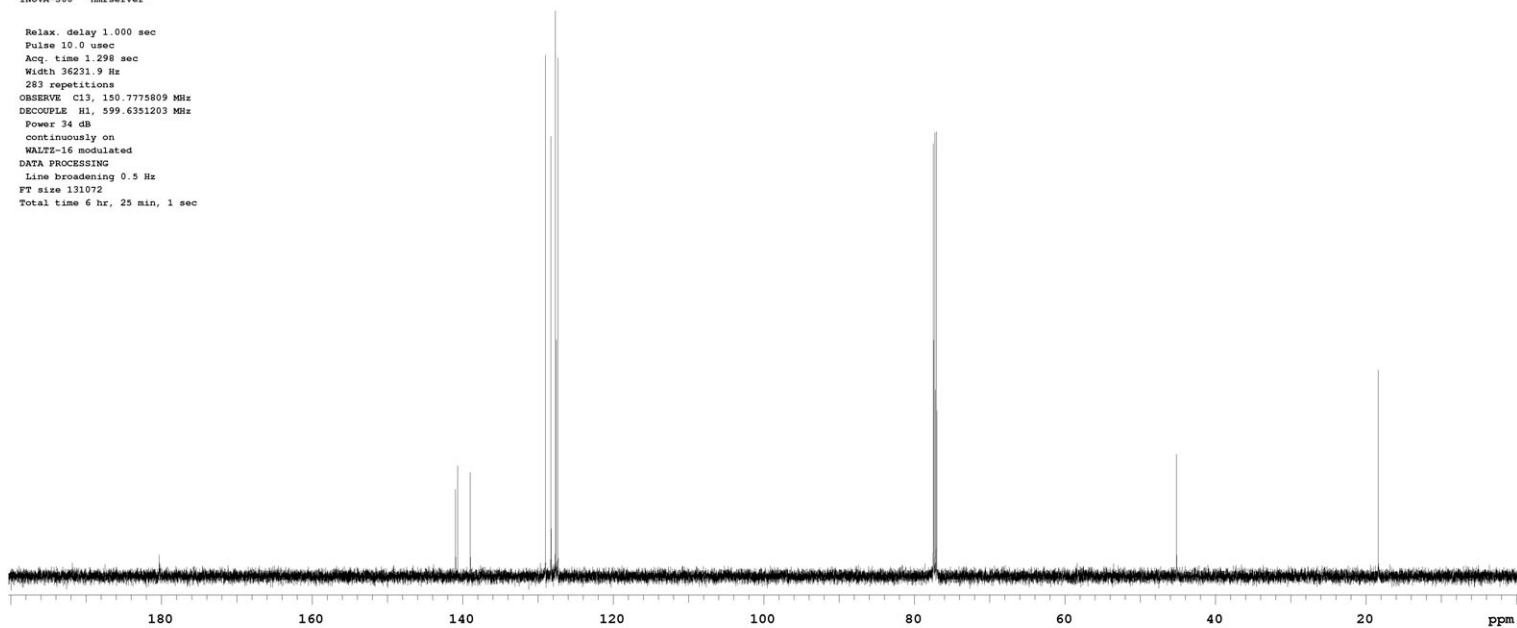

5/27/2011 10:13:05 1 / 1

## ==== Shimadzu LCsolution Analysis Report ====

C:\LabSolutions\Data\Project1\ces-8-83-02.lcd

Acquired by : Admin  
 Sample Name : ces-8-83-2  
 Sample ID : ces-8-83-2  
 Vial # :  
 Injection Volume : 20 uL  
 Data File Name : ces-8-83-02.lcd  
 Method File Name : ces-OD-H-analytical 0.46cm x 25cm.lcm  
 Batch File Name :  
 Report File Name : Default.lcr  
 Data Acquired : 4/23/2011 5:17:59 PM  
 Data Processed : 4/23/2011 7:24:08 PM

### <Chromatogram>

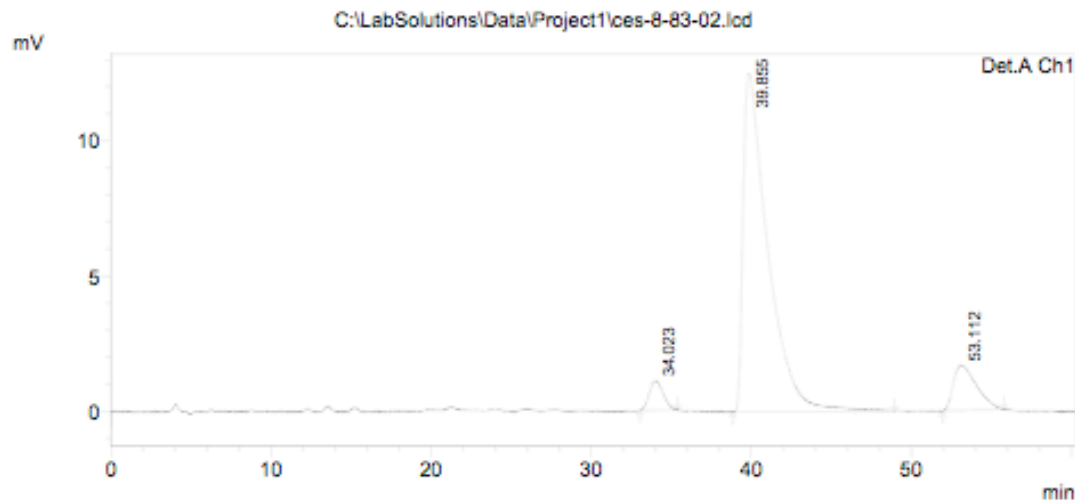

1 Det.A Ch1/215nm

PeakTable

Detector A Ch1 215nm

| Peak# | Ret. Time | Area    | Height | Area %  | Height % |
|-------|-----------|---------|--------|---------|----------|
| 1     | 34.023    | 66212   | 1096   | 4.177   | 7.171    |
| 2     | 39.855    | 1351350 | 12512  | 85.244  | 81.896   |
| 3     | 53.112    | 167720  | 1670   | 10.580  | 10.932   |
| Total |           | 1585282 | 15278  | 100.000 | 100.000  |

C:\LabSolutions\Data\Project1\ces-8-83-02.lcd

5/27/2011 12:03:04 1 / 1

## ==== Shimadzu LCsolution Analysis Report ====

C:\LabSolutions\Data\Project1\ces-8-85-02.lcd

Acquired by : Admin  
 Sample Name : ces-8-85  
 Sample ID : ces-8-85  
 Vial # :  
 Injection Volume : 50 uL  
 Data File Name : ces-8-85-02.lcd  
 Method File Name : ces-OD-H-analytical 0.46cm x 25cm.lcm  
 Batch File Name :  
 Report File Name : Default.lcr  
 Data Acquired : 4/26/2011 3:22:57 PM  
 Data Processed : 4/26/2011 10:19:11 PM

### <Chromatogram>

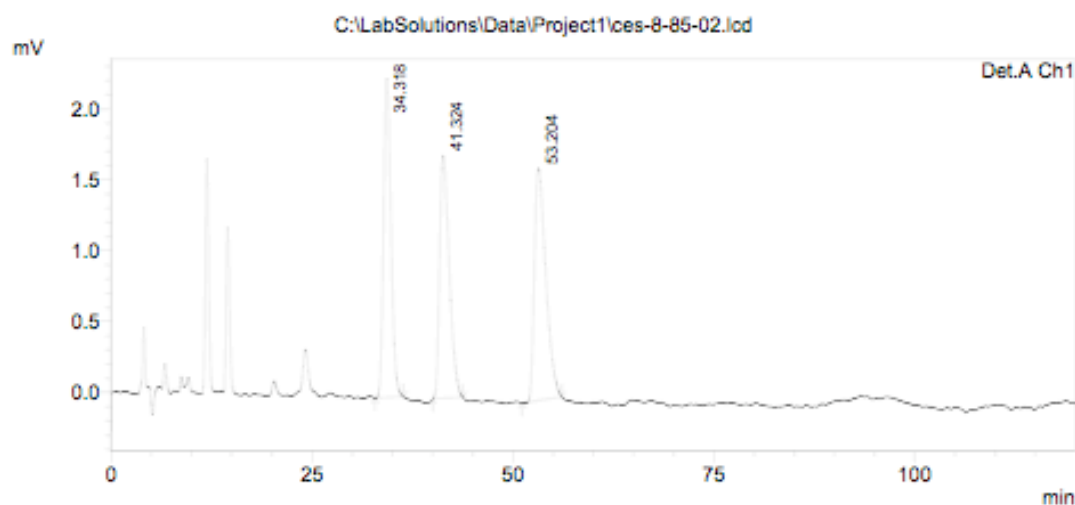

1 Det.A Ch1/215nm

PeakTable

Detector A Ch1 215nm

| Peak# | Ret. Time | Area   | Height | Area %  | Height % |
|-------|-----------|--------|--------|---------|----------|
| 1     | 34.318    | 143746 | 2250   | 32.013  | 40.161   |
| 2     | 41.324    | 142707 | 1714   | 31.782  | 30.596   |
| 3     | 53.204    | 162571 | 1638   | 36.205  | 29.243   |
| Total |           | 449024 | 5602   | 100.000 | 100.000  |

C:\LabSolutions\Data\Project1\ces-8-85-02.lcd

ces-8-75  
 File: nmr500/Zakarian/stivala/ces-8-75.fid  
 Pulse Sequence: s2pul  
 Solvent: CDCl3  
 Ambient temperature  
 Operator: stivala  
 File: ces-8-75  
 INOVA-500 "nmrserver"  
 Relax. delay 8.000 sec  
 Pulse 74.9 degrees  
 Acq. time 2.500 sec  
 Width 8503.4 Hz  
 8 repetitions  
 OBSERVE H1, 499.8560514 MHz  
 DATA PROCESSING  
 Line broadening 0.2 Hz  
 FT size 32768  
 Total time 1 min, 24 sec

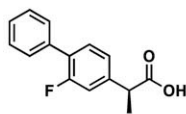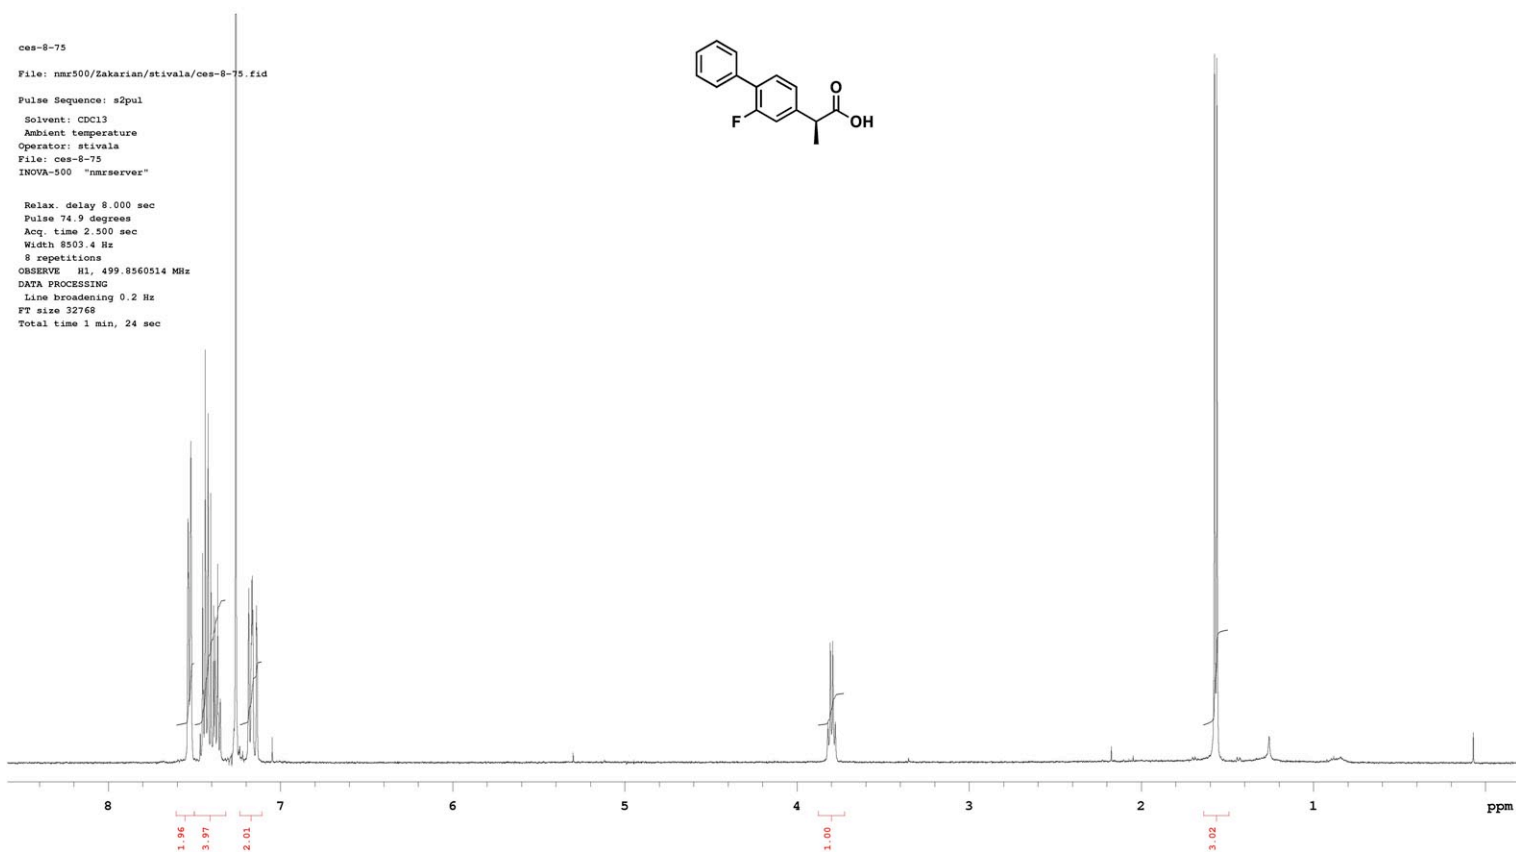

ces-8-75-cl3  
 File: nmr500/Zakarian/stivala/ces-8-75-cl3.fid  
 Pulse Sequence: s2pul  
 Solvent: CDCl3  
 Ambient temperature  
 Operator: stivala  
 File: ces-8-75-cl3  
 INOVA-500 "nmrserver"  
 Relax. delay 0.200 sec  
 Pulse 90.0 degrees  
 Acq. time 1.300 sec  
 Width 36003.6 Hz  
 80 repetitions  
 OBSERVE C13, 125.688865 MHz  
 DECOUPLE H1, 499.8563468 MHz  
 Power 36 dB  
 on during acquisition  
 off during delay  
 WALTZ-16 modulated  
 DATA PROCESSING  
 Line broadening 0.5 Hz  
 FT size 131072  
 Total time 419 hr, 16 min, 30 sec

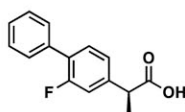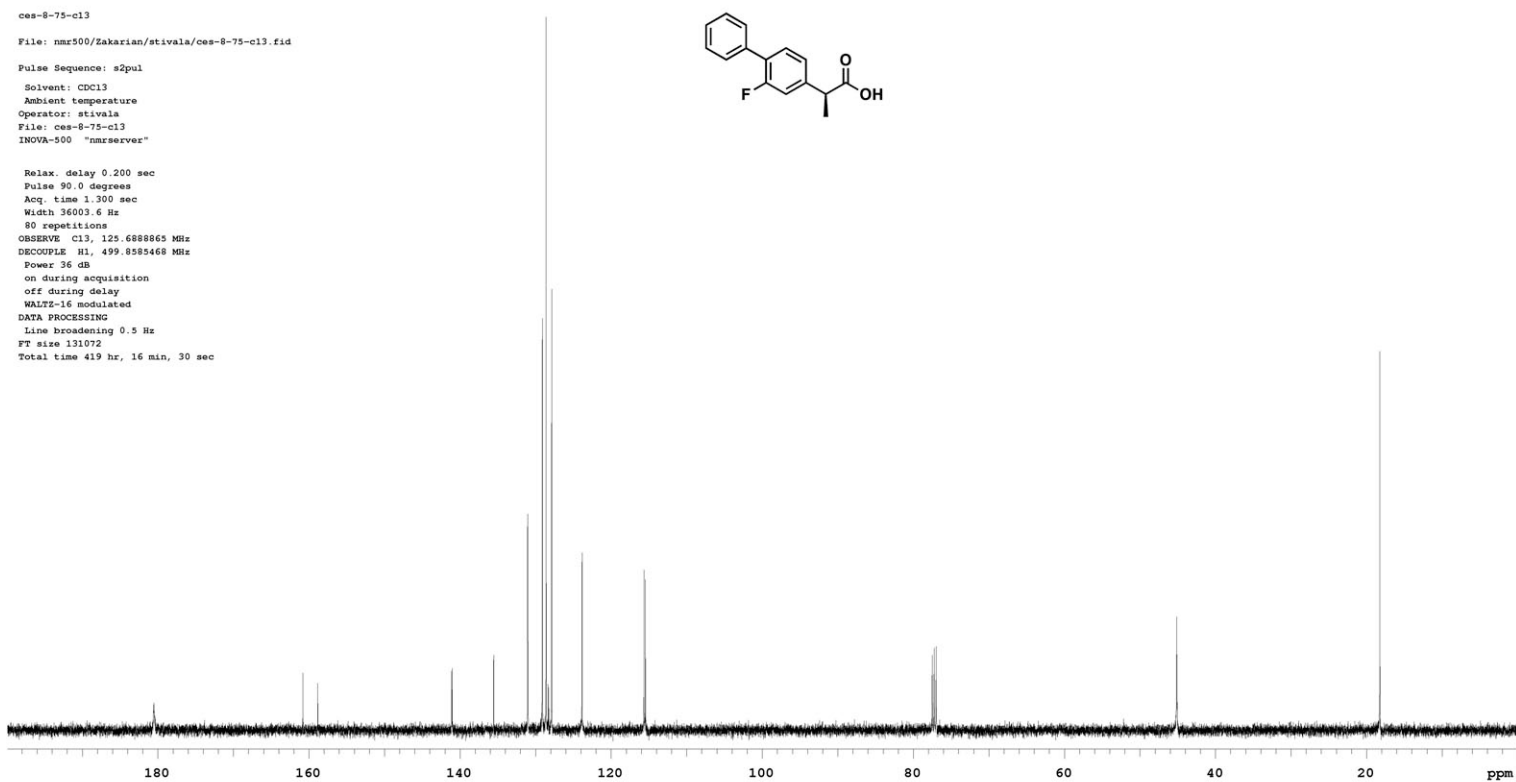

5/27/2011 10:13:42 1 / 1

## ==== Shimadzu LCsolution Analysis Report ====

C:\LabSolutions\Data\Project1\ces-8-75.lcd

Acquired by : Admin  
 Sample Name : ces-8-75  
 Sample ID : ces-8-75  
 Vial # :  
 Injection Volume : 20 uL  
 Data File Name : ces-8-75.lcd  
 Method File Name : ces-OD-H-analytical 0.46cm x 25cm.lcm  
 Batch File Name :  
 Report File Name : Default.lcr  
 Data Acquired : 4/21/2011 7:38:06 PM  
 Data Processed : 4/22/2011 10:42:47 AM

### <Chromatogram>

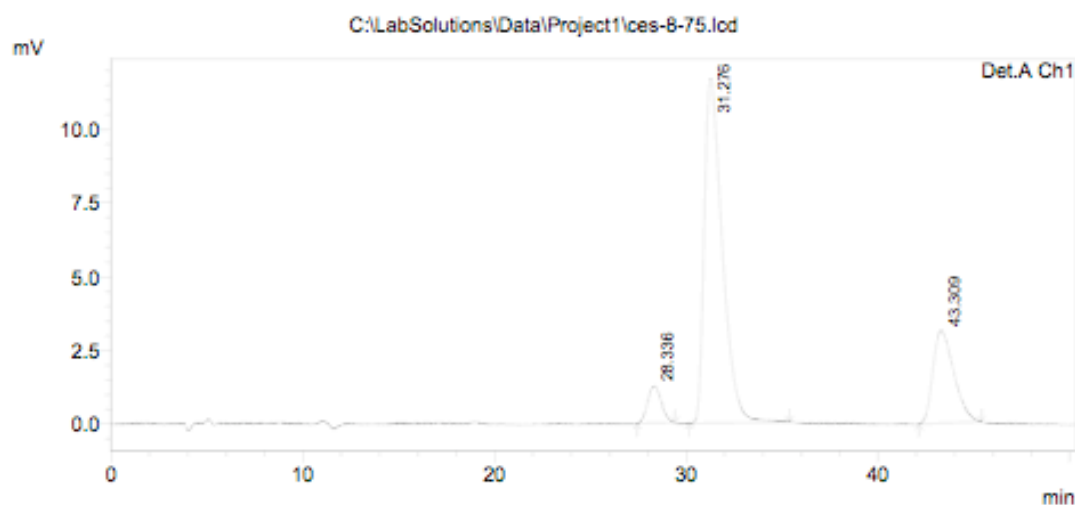

1 Det.A Ch1/215nm

PeakTable

Detector A Ch1 215nm

| Peak# | Ret. Time | Area    | Height | Area %  | Height % |
|-------|-----------|---------|--------|---------|----------|
| 1     | 28.336    | 62846   | 1262   | 5.884   | 7.836    |
| 2     | 31.276    | 765652  | 11693  | 71.679  | 72.628   |
| 3     | 43.309    | 239676  | 3145   | 22.438  | 19.535   |
| Total |           | 1068173 | 16100  | 100.000 | 100.000  |

C:\LabSolutions\Data\Project1\ces-8-75.lcd

5/27/2011 12:03:58 1 / 1

## ==== Shimadzu LCsolution Analysis Report ====

C:\LabSolutions\Data\Project1\ces-8-74.lcd

Acquired by : Admin  
 Sample Name : ces-8-74  
 Sample ID : ces-8-74  
 Vial # :  
 Injection Volume : 20 uL  
 Data File Name : ces-8-74.lcd  
 Method File Name : ces-OD-H-analytical 0.46cm x 25cm.lcm  
 Batch File Name :  
 Report File Name : Default.lcr  
 Data Acquired : 4/21/2011 6:20:14 PM  
 Data Processed : 4/21/2011 7:20:34 PM

### <Chromatogram>

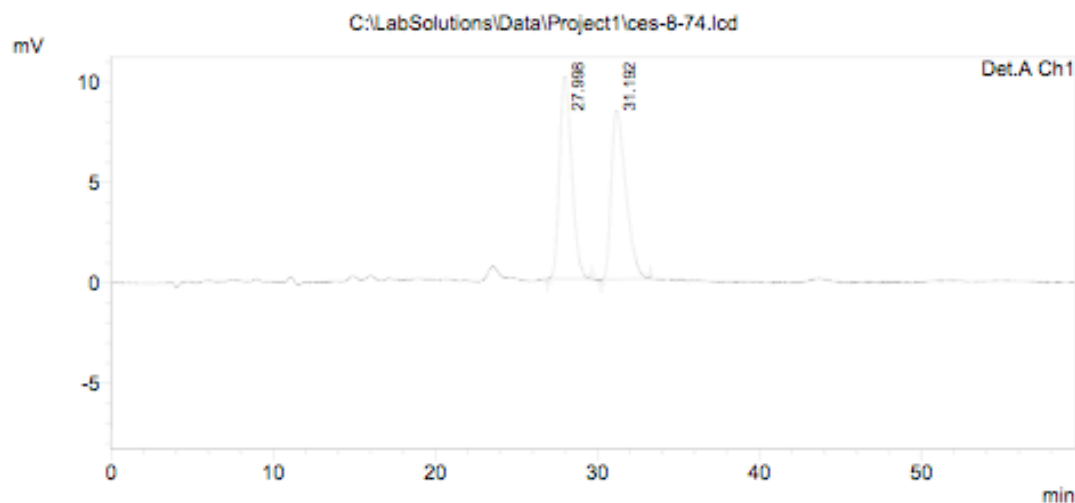

1 Det.A Ch1/215nm

PeakTable

| Peak# | Ret. Time | Area    | Height | Area %  | Height % |
|-------|-----------|---------|--------|---------|----------|
| 1     | 27.998    | 530062  | 10094  | 50.119  | 54.579   |
| 2     | 31.192    | 527551  | 8400   | 49.881  | 45.421   |
| Total |           | 1057613 | 18494  | 100.000 | 100.000  |

C:\LabSolutions\Data\Project1\ces-8-74.lcd

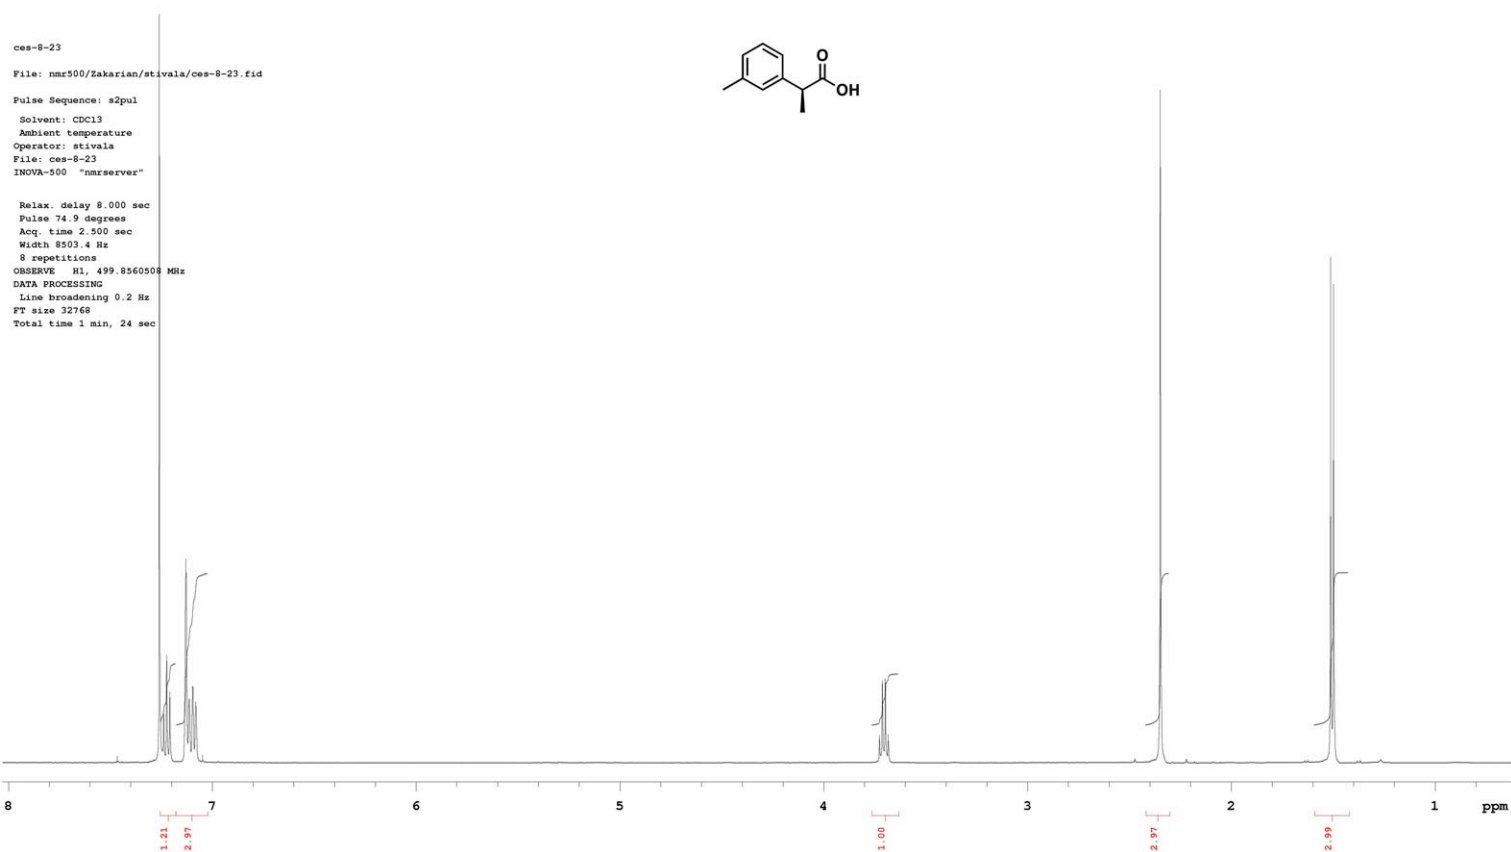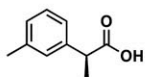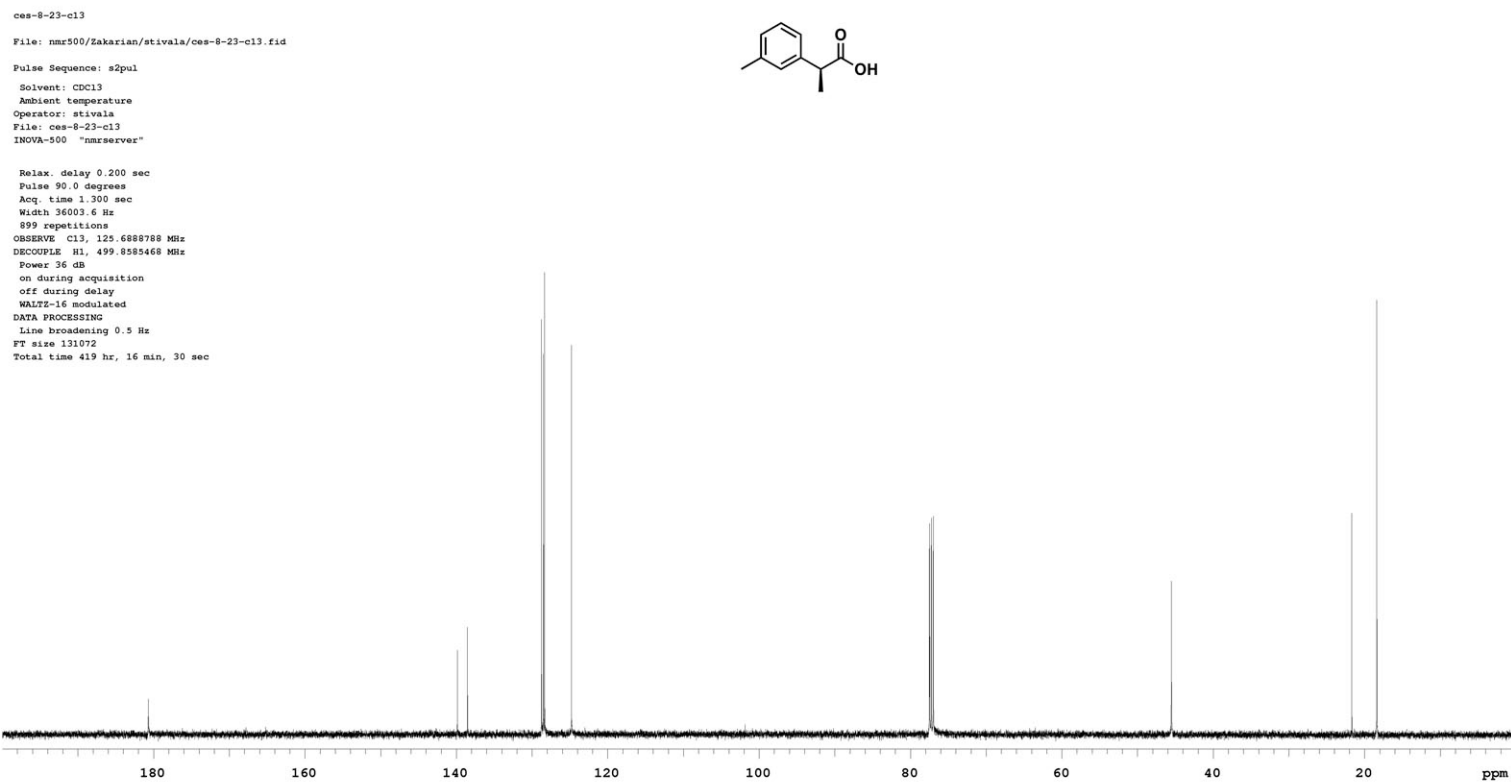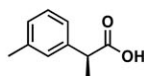

5/27/2011 10:14:26 1 / 1

## ==== Shimadzu LCsolution Analysis Report ====

C:\LabSolutions\Data\Project1\ces-8-23.lcd

Acquired by : Admin  
 Sample Name : ces-8-23  
 Sample ID : ces-8-23  
 Vial # :  
 Injection Volume : 20 uL  
 Data File Name : ces-8-23.lcd  
 Method File Name : ces-OD-H-analytical.lcm  
 Batch File Name :  
 Report File Name : Default.lcr  
 Data Acquired : 3/31/2011 3:30:37 PM  
 Data Processed : 3/31/2011 4:09:42 PM

### <Chromatogram>

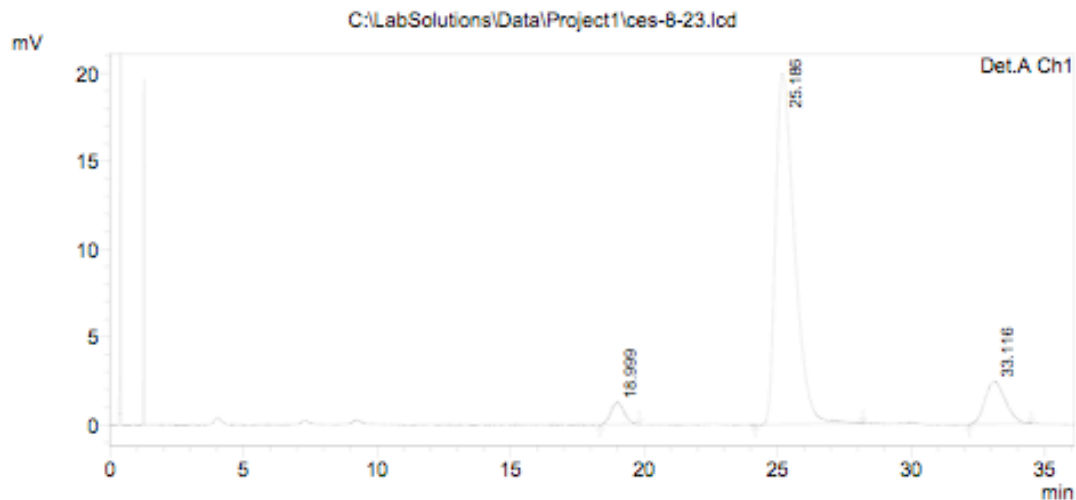

1 Det.A Ch1/215nm

PeakTable

Detector A Ch1 215nm

| Peak# | Ret. Time | Area    | Height | Area %  | Height % |
|-------|-----------|---------|--------|---------|----------|
| 1     | 18.999    | 43484   | 1252   | 3.764   | 5.294    |
| 2     | 25.186    | 983197  | 19972  | 85.105  | 84.480   |
| 3     | 33.116    | 128599  | 2418   | 11.131  | 10.226   |
| Total |           | 1155281 | 23641  | 100.000 | 100.000  |

C:\LabSolutions\Data\Project1\ces-8-23.lcd



5/27/2011 12:05:58 1 / 1

## ==== Shimadzu LCsolution Analysis Report ====

C:\LabSolutions\Data\Project1\ces-8-24.lcd

Acquired by : Admin  
 Sample Name : ces-8-24  
 Sample ID : ces-8-24  
 Vial # :  
 Injection Volume : 20 uL  
 Data File Name : ces-8-24.lcd  
 Method File Name : ces-OD-H-analytical.lcm  
 Batch File Name :  
 Report File Name : Default.lcr  
 Data Acquired : 3/31/2011 6:10:48 PM  
 Data Processed : 3/31/2011 6:42:21 PM

### <Chromatogram>

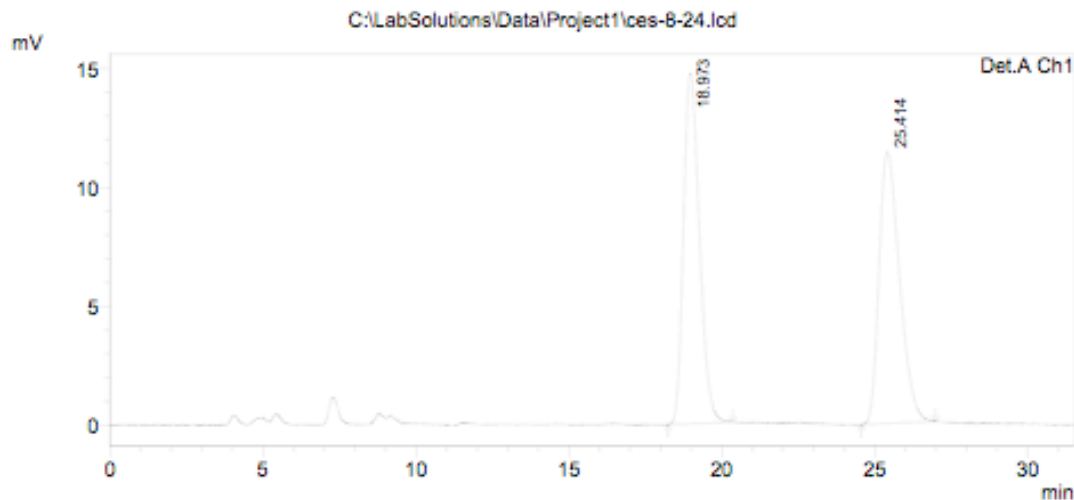

1 Det.A Ch1/215nm

PeakTable

Detector A Ch1 215nm

| Peak# | Ret. Time | Area    | Height | Area %  | Height % |
|-------|-----------|---------|--------|---------|----------|
| 1     | 18.973    | 535463  | 14735  | 50.095  | 56.345   |
| 2     | 25.414    | 533434  | 11416  | 49.905  | 43.655   |
| Total |           | 1068897 | 26151  | 100.000 | 100.000  |

C:\LabSolutions\Data\Project1\ces-8-24.lcd

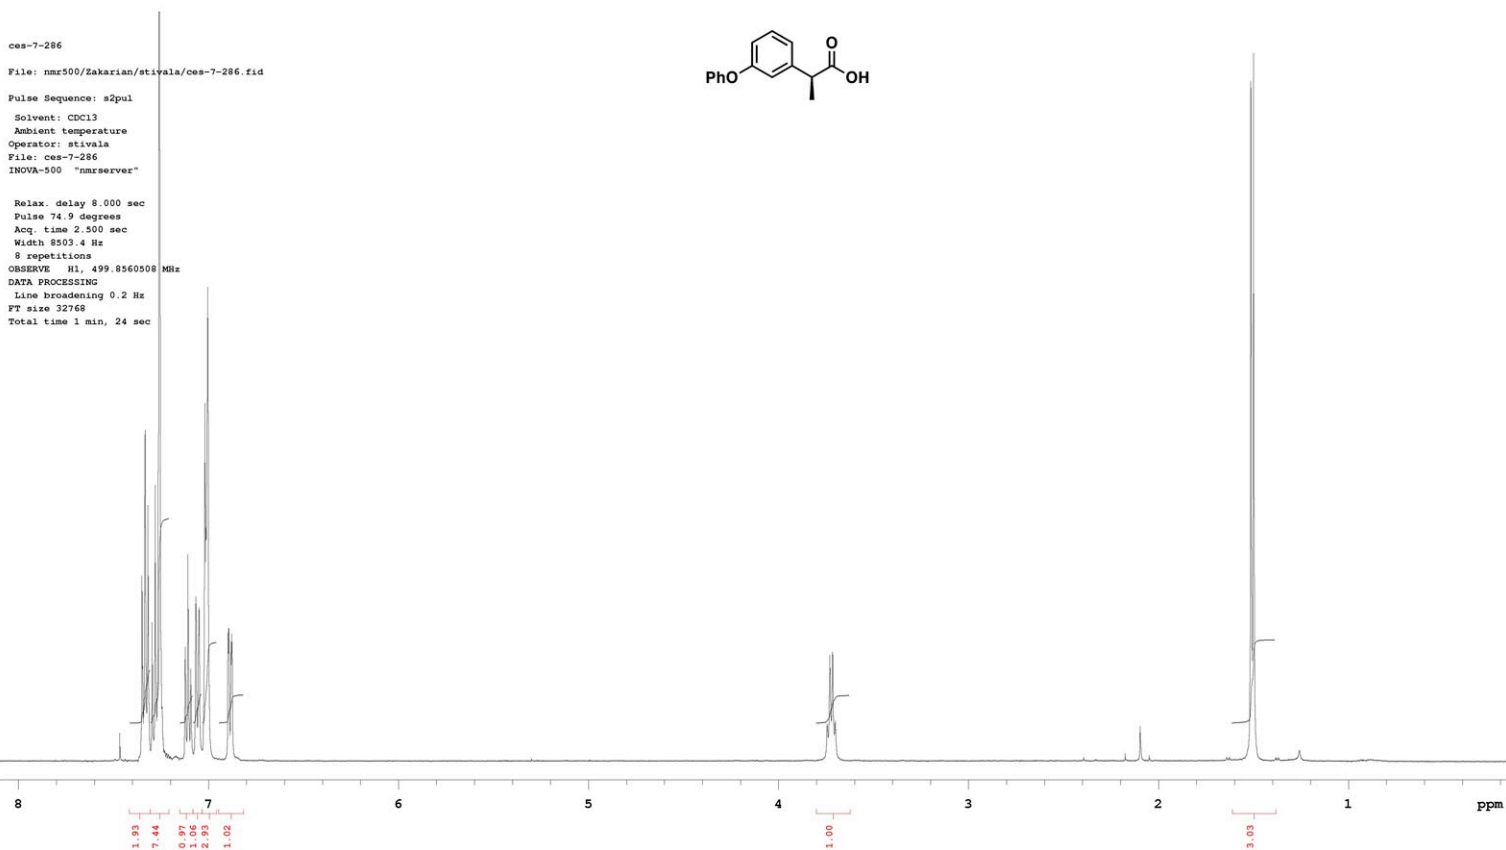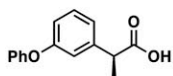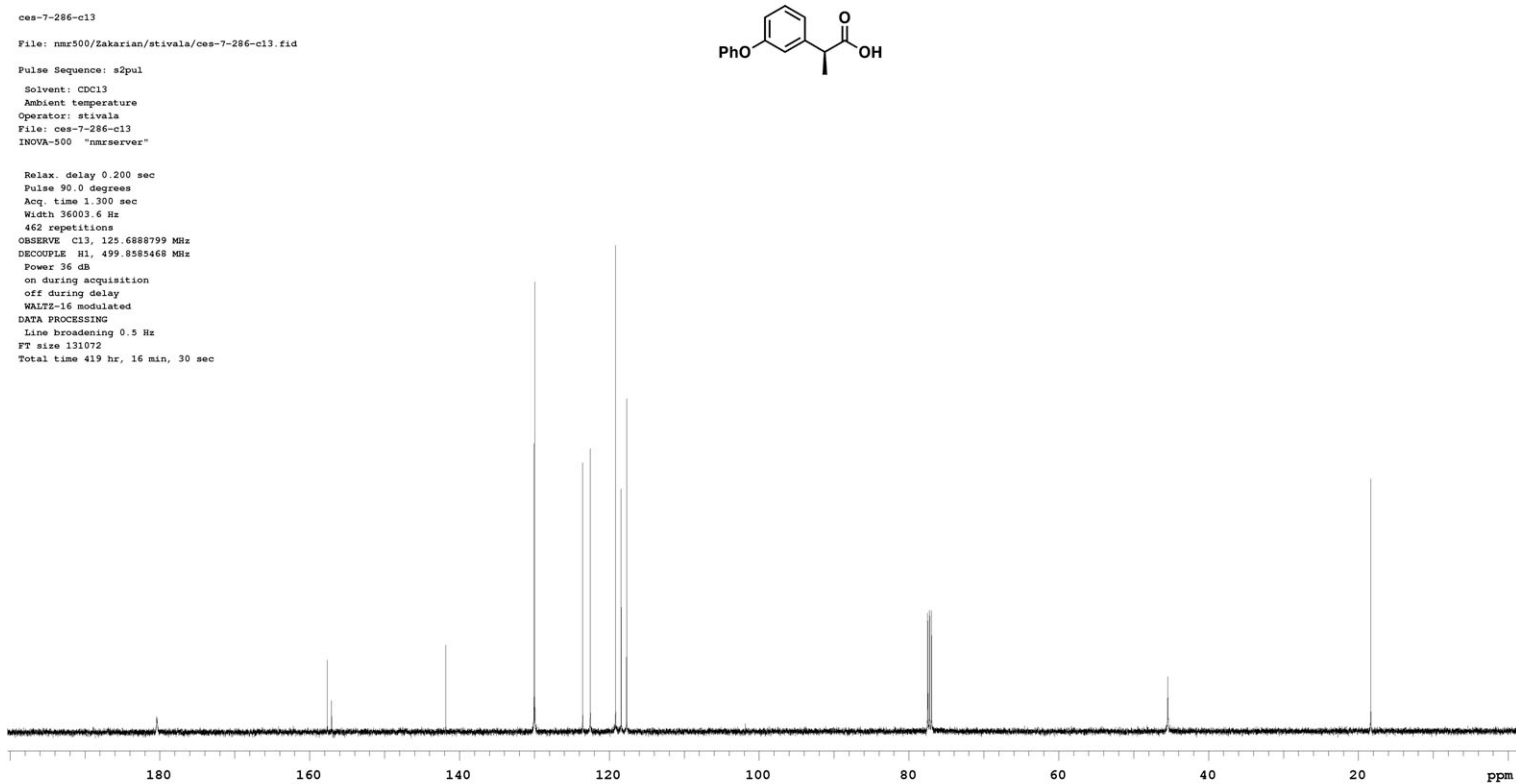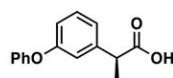

5/27/2011 10:15:23 1 / 1

## ==== Shimadzu LCsolution Analysis Report ====

C:\LabSolutions\Data\Project1\ces-7-286-02.lcd

Acquired by : Admin  
 Sample Name : ces-7-286  
 Sample ID : ces-7-286  
 Vial # :  
 Injection Volume : 20 uL  
 Data File Name : ces-7-286-02.lcd  
 Method File Name : ces-OD-H-analytical.lcm  
 Batch File Name :  
 Report File Name : Default.lcr  
 Data Acquired : 3/19/2011 3:35:44 PM  
 Data Processed : 3/19/2011 5:56:56 PM

### <Chromatogram>

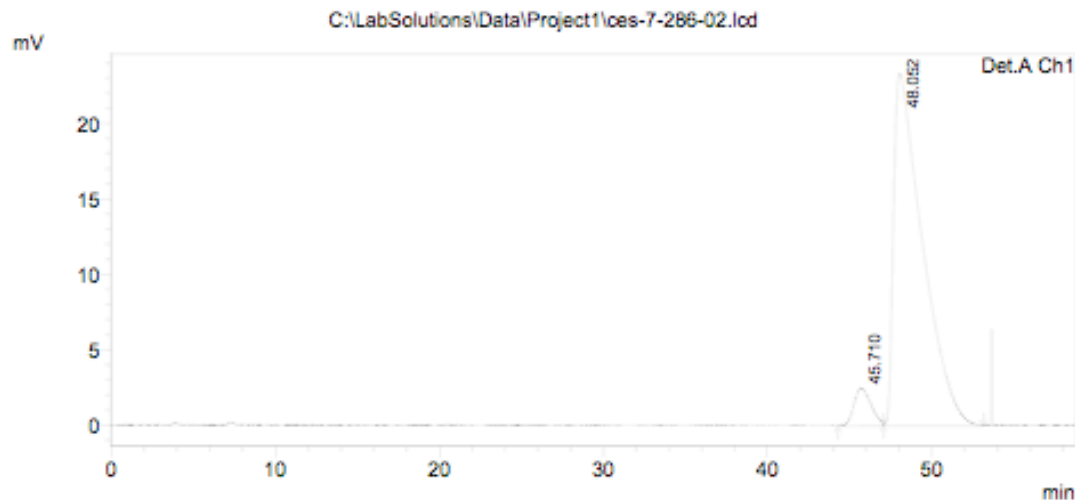

PeakTable

Detector A Ch1 215nm

| Peak# | Ret. Time | Area    | Height | Area %  | Height % |
|-------|-----------|---------|--------|---------|----------|
| 1     | 45.710    | 182859  | 2503   | 6.031   | 9.683    |
| 2     | 48.052    | 2849290 | 23343  | 93.969  | 90.317   |
| Total |           | 3032149 | 25845  | 100.000 | 100.000  |

5/27/2011 11:26:07 1 / 1

## ==== Shimadzu LCsolution Analysis Report ====

C:\LabSolutions\Data\Project1\ces-7-292.lcd

Acquired by : Admin  
 Sample Name : ces-7-292  
 Sample ID : ces-7-292  
 Vial # :  
 Injection Volume : 20 uL  
 Data File Name : ces-7-292.lcd  
 Method File Name : ces-OD-H-analytical.lcm  
 Batch File Name :  
 Report File Name : Default.lcr  
 Data Acquired : 3/19/2011 4:58:13 PM  
 Data Processed : 3/19/2011 7:19:52 PM

### <Chromatogram>

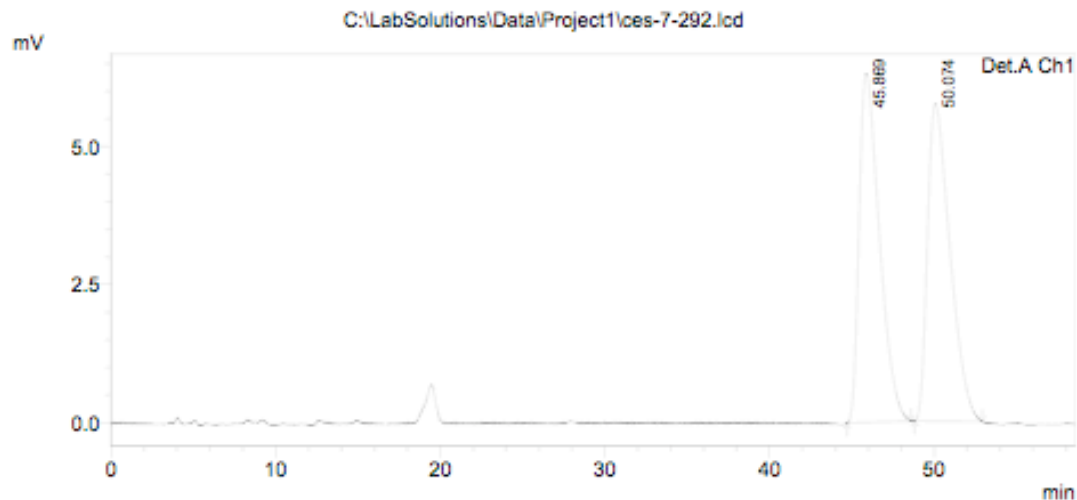

1 Det.A Ch1/215nm

PeakTable

Detector A Ch1 215nm

| Peak# | Ret. Time | Area    | Height | Area %  | Height % |
|-------|-----------|---------|--------|---------|----------|
| 1     | 45.869    | 542321  | 6318   | 49.881  | 52.424   |
| 2     | 50.074    | 544910  | 5734   | 50.119  | 47.576   |
| Total |           | 1087231 | 12052  | 100.000 | 100.000  |

C:\LabSolutions\Data\Project1\ces-7-292.lcd

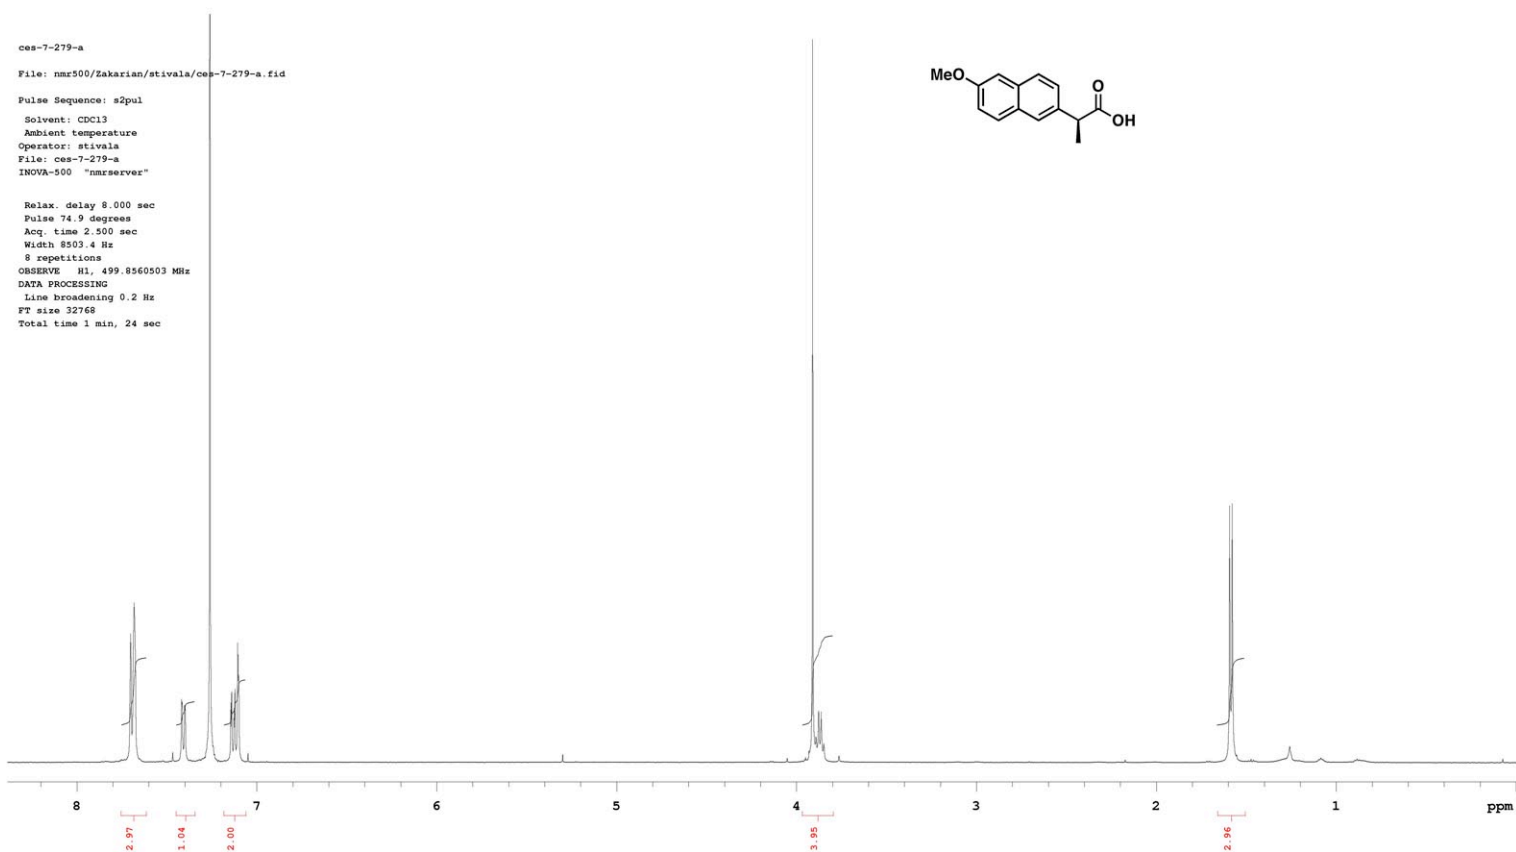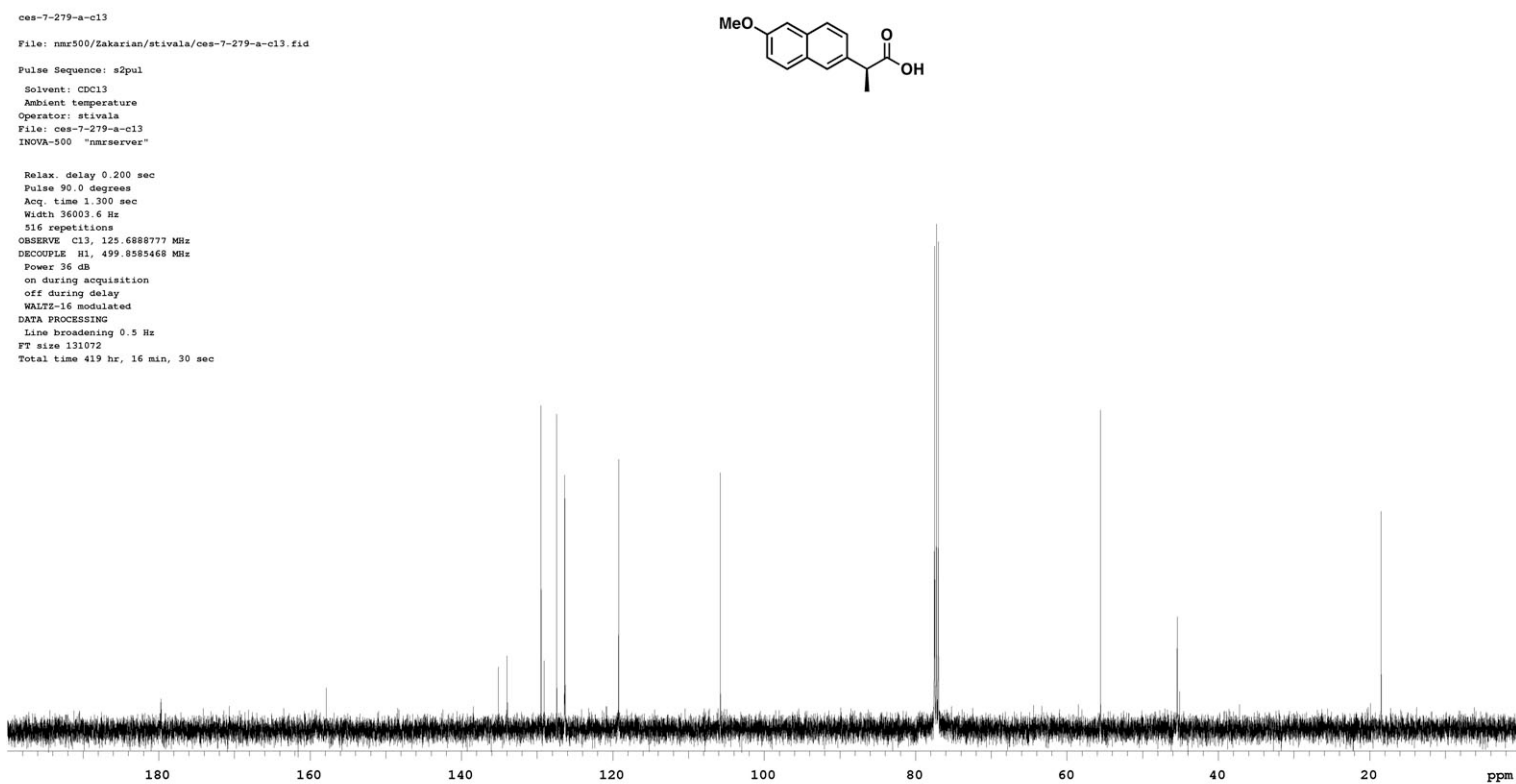

5/27/2011 10:16:53 1 / 1

## ==== Shimadzu LCsolution Analysis Report ====

C:\LabSolutions\Data\Project1\ces-7-279-02.lcd

Acquired by : Admin  
 Sample Name : ces-7-279  
 Sample ID : ces-7-279  
 Vial # :  
 Injection Volume : 10 uL  
 Data File Name : ces-7-279-02.lcd  
 Method File Name : ces-AD-H-analytical.lcm  
 Batch File Name :  
 Report File Name : Default.lcr  
 Data Acquired : 3/12/2011 1:49:56 PM  
 Data Processed : 3/12/2011 2:20:44 PM

### <Chromatogram>

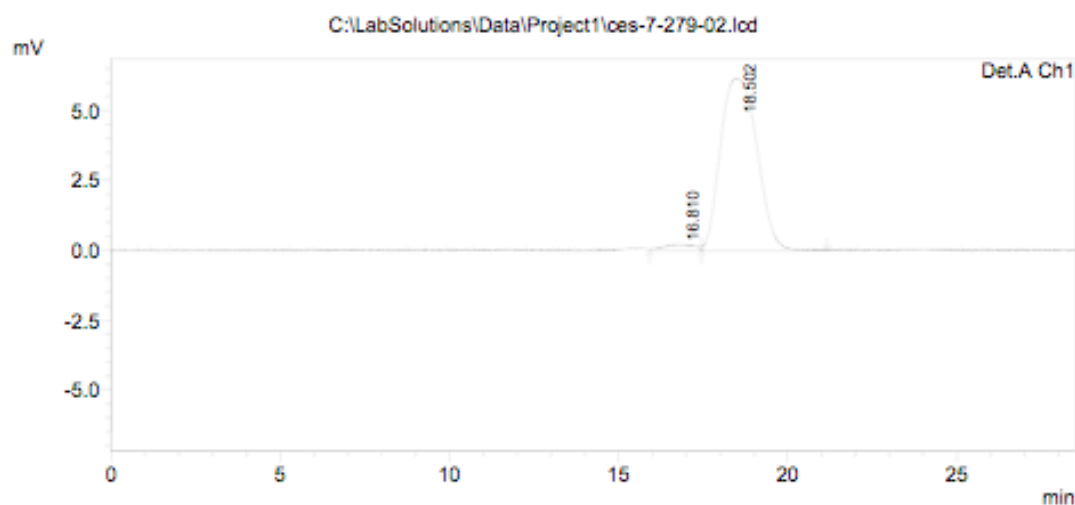

1 Det.A Ch1/254nm

PeakTable

Detector A Ch1 254nm

| Peak# | Ret. Time | Area   | Height | Area %  | Height % |
|-------|-----------|--------|--------|---------|----------|
| 1     | 16.810    | 13492  | 207    | 2.842   | 3.252    |
| 2     | 18.502    | 461203 | 6162   | 97.158  | 96.748   |
| Total |           | 474695 | 6370   | 100.000 | 100.000  |

C:\LabSolutions\Data\Project1\ces-7-279-02.lcd

5/27/2011 20:03:45 1 / 1

## ==== Shimadzu LCsolution Analysis Report ====

C:\LabSolutions\Data\Project1\ces-8-110.lcd

Acquired by : Admin  
 Sample Name : ces-8-109  
 Sample ID : ces-8-109  
 Vial # :  
 Injection Volume : 25 uL  
 Data File Name : ces-8-110.lcd  
 Method File Name : ces-AD-H-analytical 0.46cm x 25cm.lcm  
 Batch File Name :  
 Report File Name : Default.lcr  
 Data Acquired : 5/27/2011 7:40:04 PM  
 Data Processed : 5/27/2011 8:03:01 PM

### <Chromatogram>

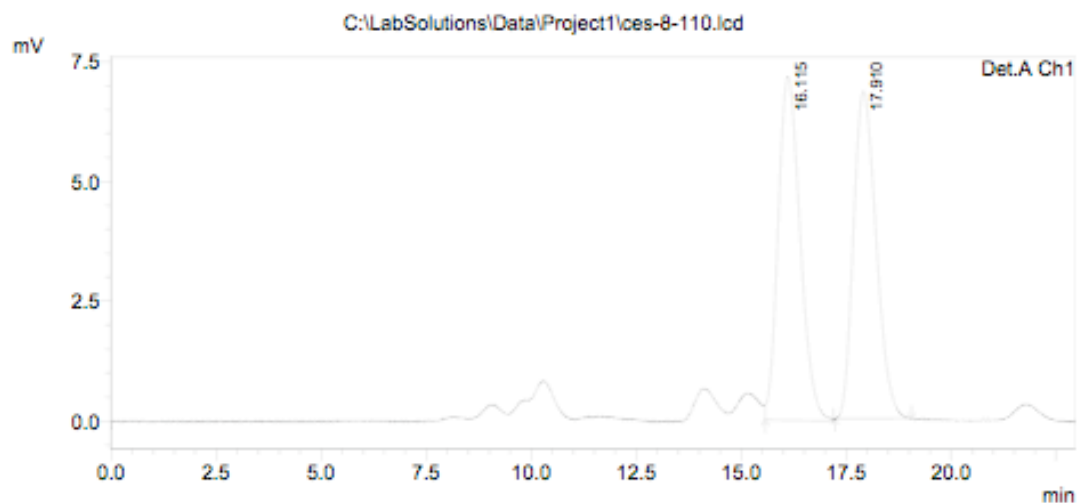

1 Det.A Ch1/254nm

PeakTable

Detector A Ch1 254nm

| Peak# | Ret. Time | Area   | Height | Area %  | Height % |
|-------|-----------|--------|--------|---------|----------|
| 1     | 16.115    | 262080 | 7180   | 50.468  | 51.243   |
| 2     | 17.910    | 257223 | 6832   | 49.532  | 48.757   |
| Total |           | 519302 | 14012  | 100.000 | 100.000  |

C:\LabSolutions\Data\Project1\ces-8-110.lcd

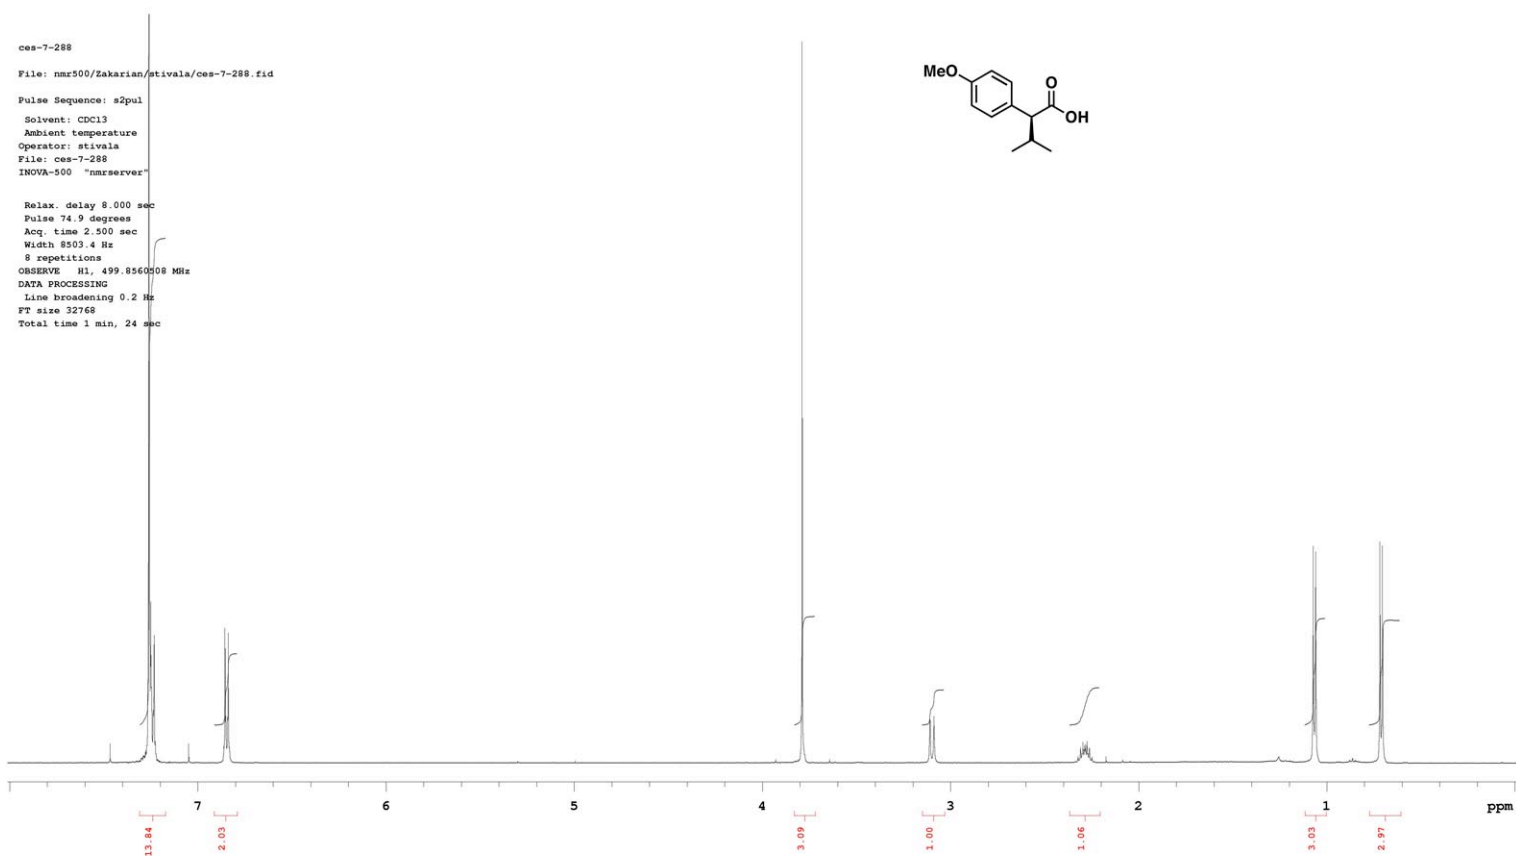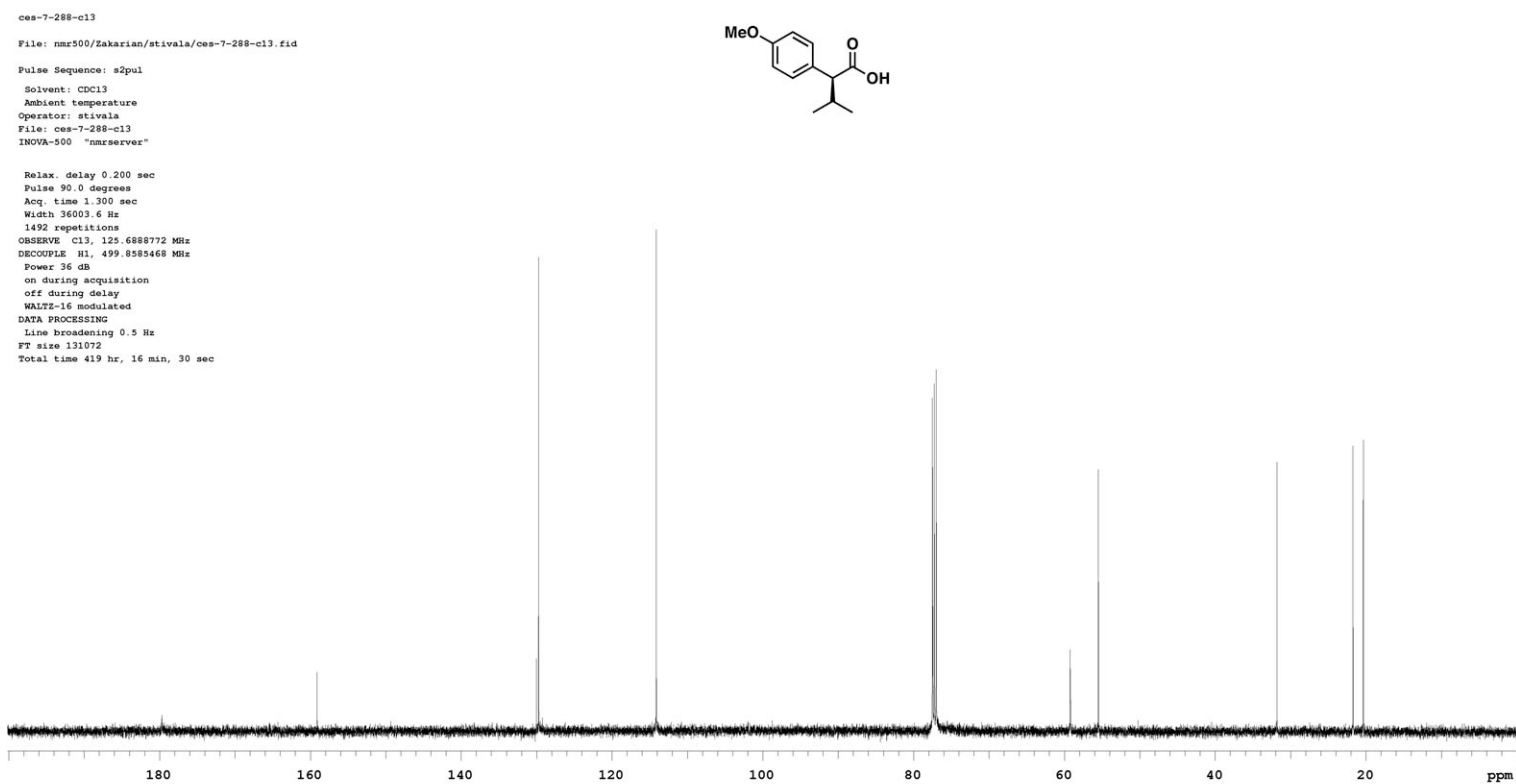



5/27/2011 10:25:08 1 / 1

## ==== Shimadzu LCsolution Analysis Report ====

C:\LabSolutions\Data\Project1\ces-7-288.lcd

Acquired by : Admin  
 Sample Name : ces-7-288  
 Sample ID : ces-7-288  
 Vial # :  
 Injection Volume : 20 uL  
 Data File Name : ces-7-288.lcd  
 Method File Name : ces-OD-H-analytical.lcm  
 Batch File Name :  
 Report File Name : Default.lcr  
 Data Acquired : 3/19/2011 11:50:35 AM  
 Data Processed : 3/19/2011 3:10:45 PM

### <Chromatogram>

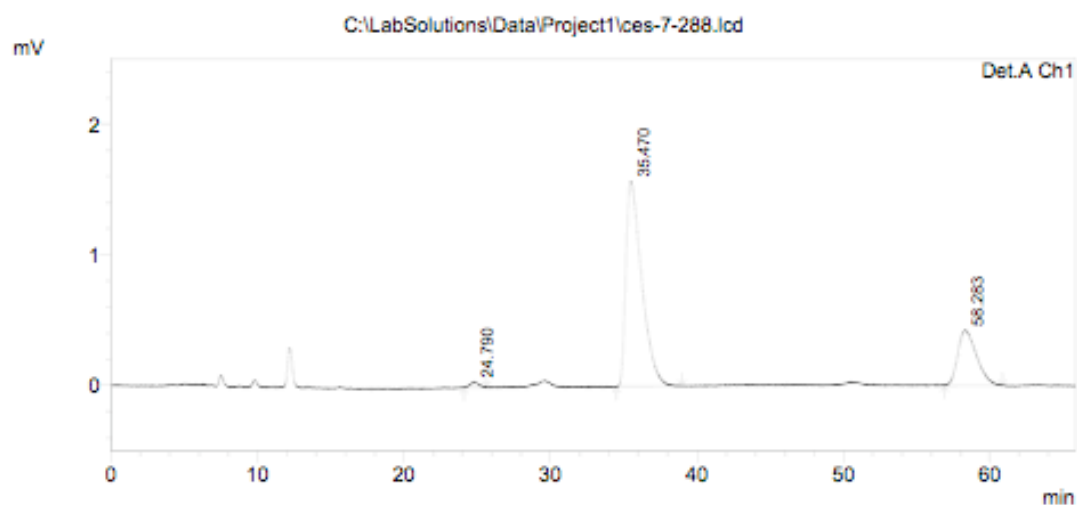

PeakTable

Detector A Ch1 275nm

| Peak# | Ret. Time | Area   | Height | Area %  | Height % |
|-------|-----------|--------|--------|---------|----------|
| 1     | 24.790    | 1643   | 43     | 1.041   | 2.093    |
| 2     | 35.470    | 118377 | 1566   | 75.016  | 77.041   |
| 3     | 58.283    | 37783  | 424    | 23.943  | 20.865   |
| Total |           | 157803 | 2033   | 100.000 | 100.000  |

C:\LabSolutions\Data\Project1\ces-7-288.lcd

5/27/2011 11:24:45 1 / 1

## ==== Shimadzu LCsolution Analysis Report ====

C:\LabSolutions\Data\Project1\ces-7-291.lcd

Acquired by : Admin  
 Sample Name : ces-7-291  
 Sample ID : ces-7-291  
 Vial # :  
 Injection Volume : 20 uL  
 Data File Name : ces-7-291.lcd  
 Method File Name : ces-OD-H-analytical.lcm  
 Batch File Name :  
 Report File Name : Default.lcr  
 Data Acquired : 3/19/2011 2:30:15 PM  
 Data Processed : 3/19/2011 3:21:33 PM

### <Chromatogram>

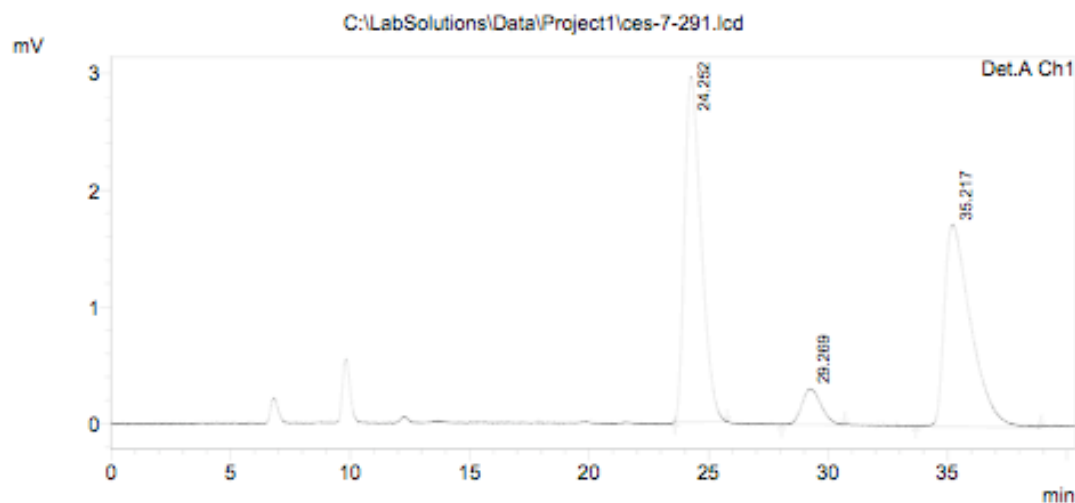

PeakTable

Detector A Ch1 275nm

| Peak# | Ret. Time | Area   | Height | Area %  | Height % |
|-------|-----------|--------|--------|---------|----------|
| 1     | 24.252    | 144169 | 2953   | 49.004  | 59.165   |
| 2     | 29.269    | 17036  | 309    | 5.791   | 6.192    |
| 3     | 35.217    | 132991 | 1729   | 45.205  | 34.642   |
| Total |           | 294196 | 4991   | 100.000 | 100.000  |

C:\LabSolutions\Data\Project1\ces-7-291.lcd

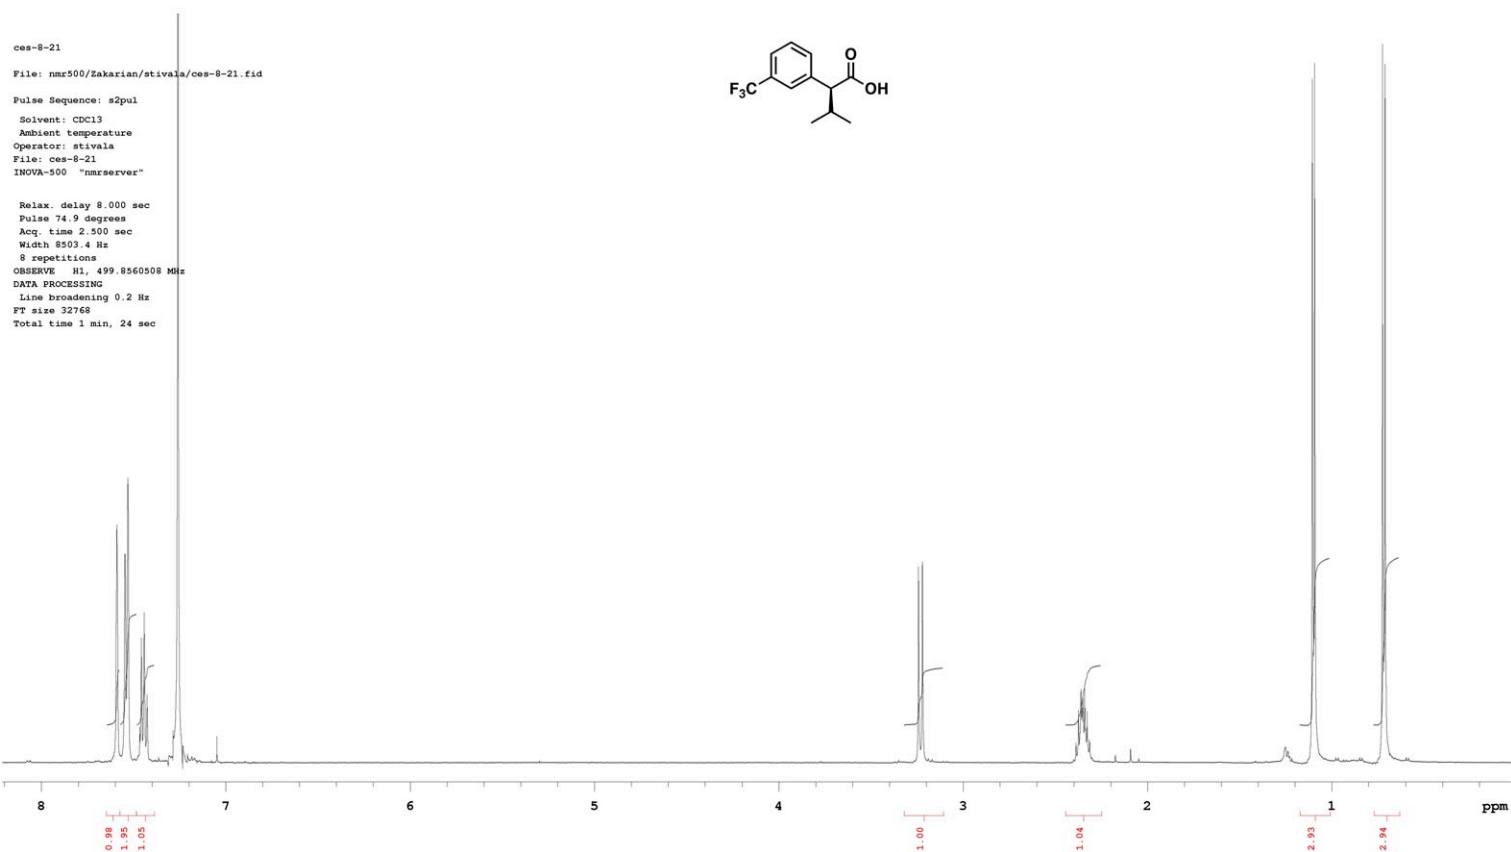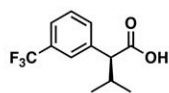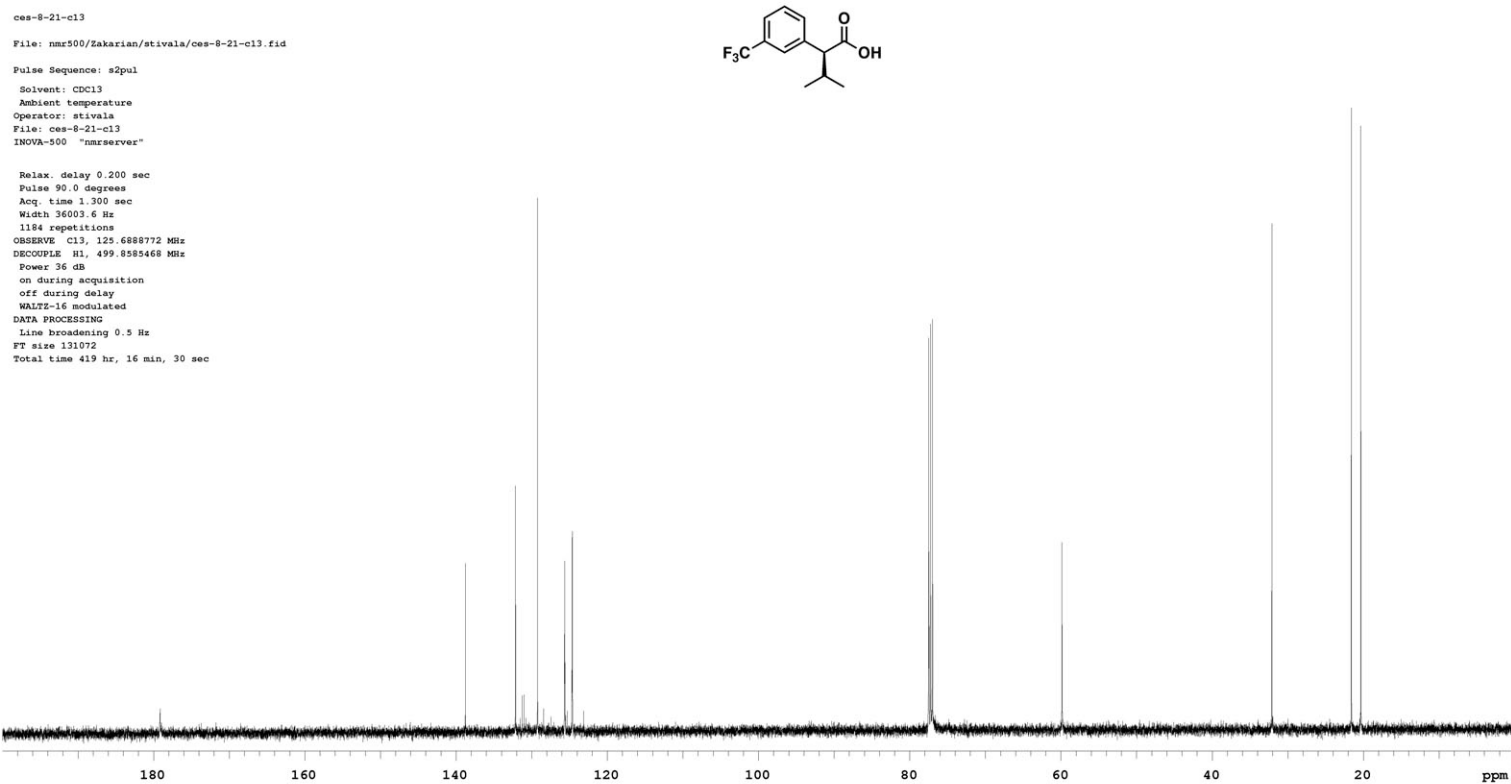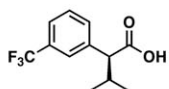

5/27/2011 10:27:15 1 / 1

## ==== Shimadzu LCsolution Analysis Report ====

C:\LabSolutions\Data\Project1\ces-8-21.lcd

Acquired by : Admin  
 Sample Name : ces-8-21  
 Sample ID : ces-8-21  
 Vial # :  
 Injection Volume : 20 uL  
 Data File Name : ces-8-21.lcd  
 Method File Name : ces-OD-H-analytical.lcm  
 Batch File Name :  
 Report File Name : Default.lcr  
 Data Acquired : 3/31/2011 4:29:30 PM  
 Data Processed : 3/31/2011 4:55:07 PM

### <Chromatogram>

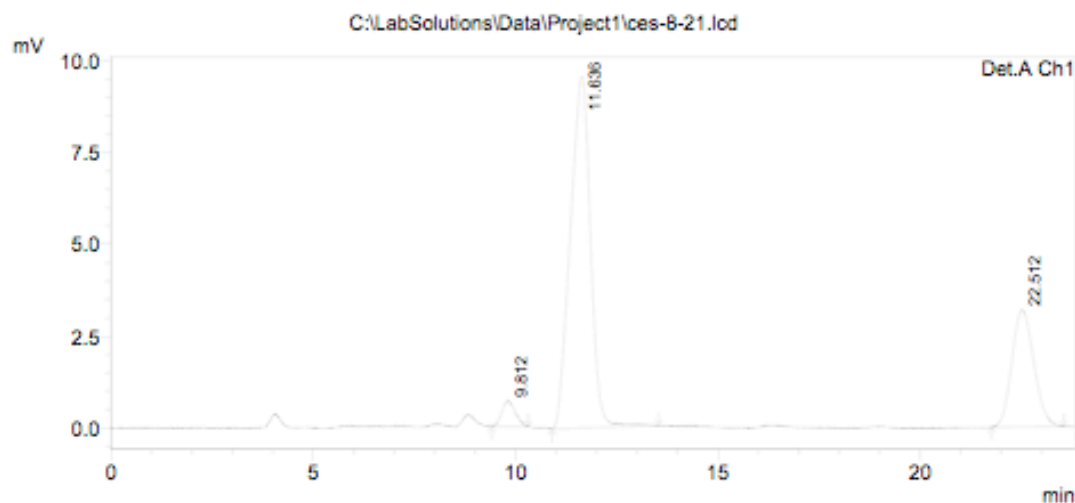

PeakTable

| Peak# | Ret. Time | Area   | Height | Area %  | Height % |
|-------|-----------|--------|--------|---------|----------|
| 1     | 9.812     | 16039  | 686    | 3.432   | 5.101    |
| 2     | 11.636    | 331249 | 9576   | 70.880  | 71.241   |
| 3     | 22.512    | 120048 | 3180   | 25.688  | 23.658   |
| Total |           | 467336 | 13442  | 100.000 | 100.000  |

C:\LabSolutions\Data\Project1\ces-8-21.lcd

5/27/2011 12:07:18 1 / 1

## ==== Shimadzu LCsolution Analysis Report ====

C:\LabSolutions\Data\Project1\ces-8-19.lcd

Acquired by : Admin  
 Sample Name : ces-8-19  
 Sample ID : ces-8-19  
 Vial # :  
 Injection Volume : 20 uL  
 Data File Name : ces-8-19.lcd  
 Method File Name : ces-OD-H-analytical.lcm  
 Batch File Name :  
 Report File Name : Default.lcr  
 Data Acquired : 3/30/2011 5:46:16 PM  
 Data Processed : 3/30/2011 6:33:33 PM

### <Chromatogram>

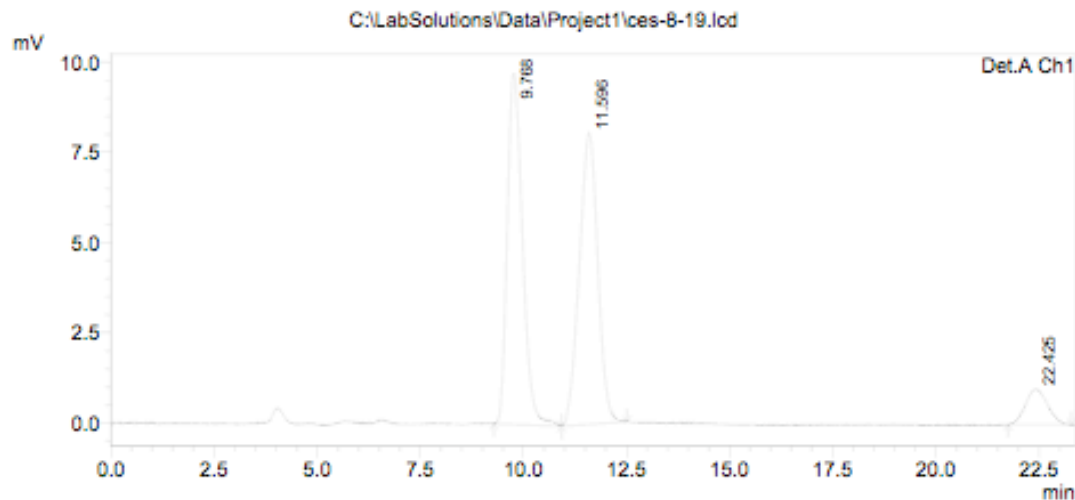

1 Det.A Ch1/215nm

PeakTable

Detector A Ch1 215nm

| Peak# | Ret. Time | Area   | Height | Area %  | Height % |
|-------|-----------|--------|--------|---------|----------|
| 1     | 9.768     | 249285 | 9735   | 46.372  | 51.877   |
| 2     | 11.596    | 251873 | 8060   | 46.854  | 42.954   |
| 3     | 22.425    | 36416  | 970    | 6.774   | 5.169    |
| Total |           | 537573 | 18765  | 100.000 | 100.000  |

C:\LabSolutions\Data\Project1\ces-8-19.lcd

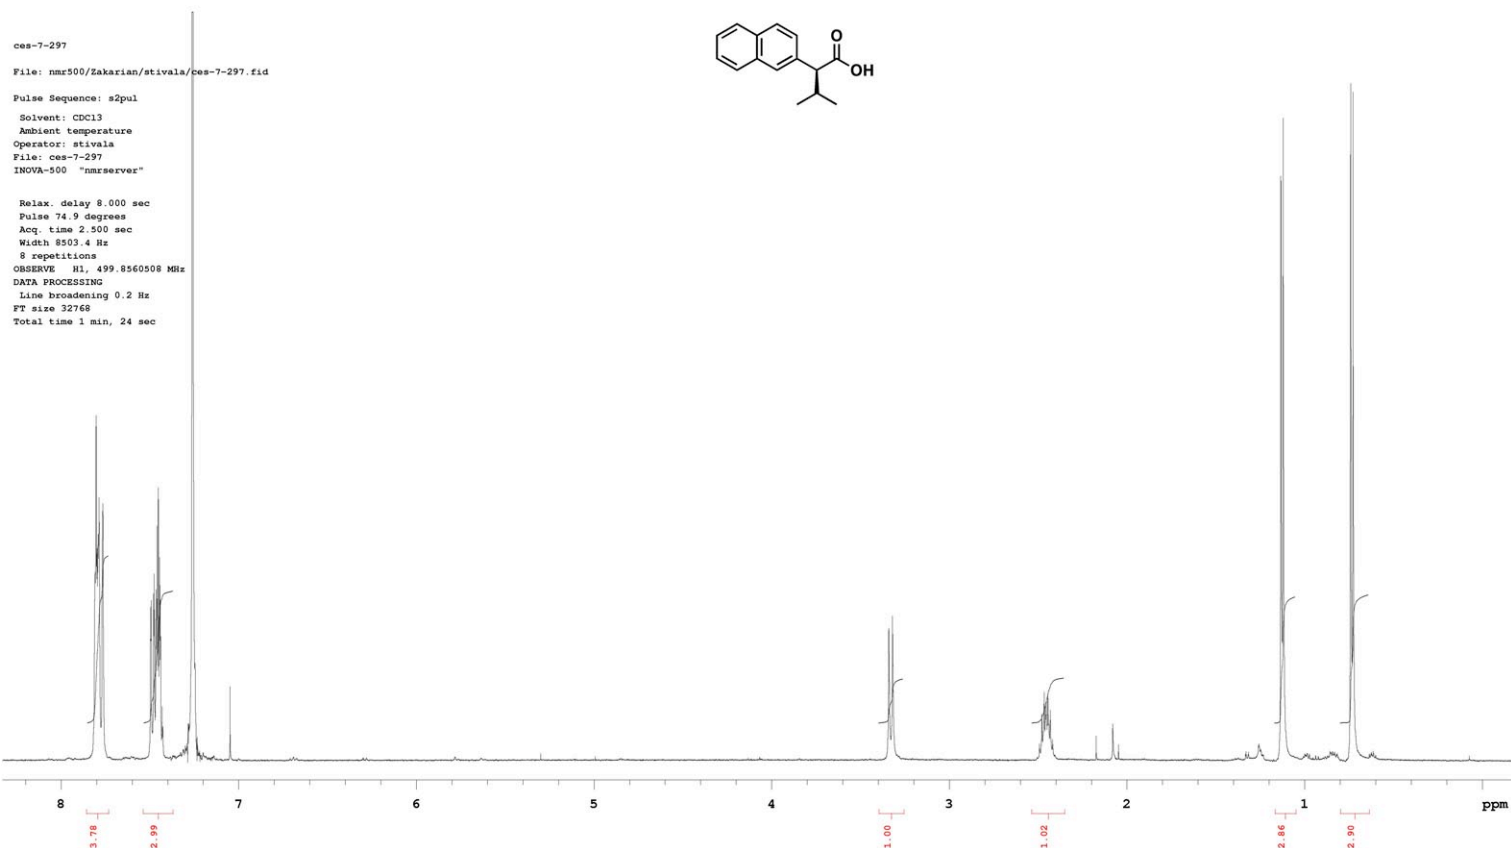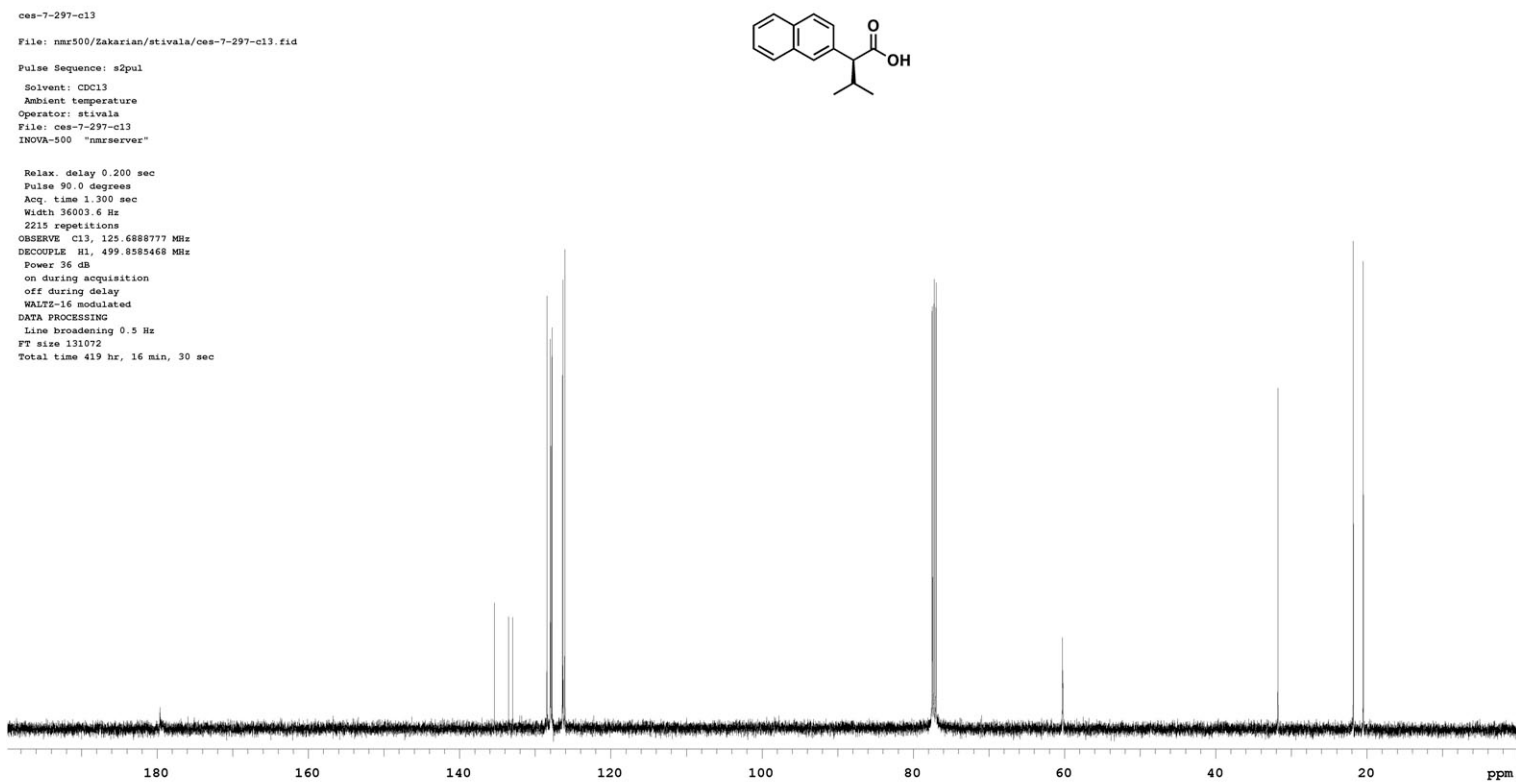

5/27/2011 10:28:05 1 / 1

## ==== Shimadzu LCsolution Analysis Report ====

C:\LabSolutions\Data\Project1\ces-7-297.lcd

Acquired by : Admin  
 Sample Name : ces-7-297  
 Sample ID : ces-7-297  
 Vial # :  
 Injection Volume : 20 uL  
 Data File Name : ces-7-297.lcd  
 Method File Name : ces-OD-H-analytical.lcm  
 Batch File Name :  
 Report File Name : Default.lcr  
 Data Acquired : 3/22/2011 7:46:14 PM  
 Data Processed : 3/23/2011 10:09:32 AM

### <Chromatogram>

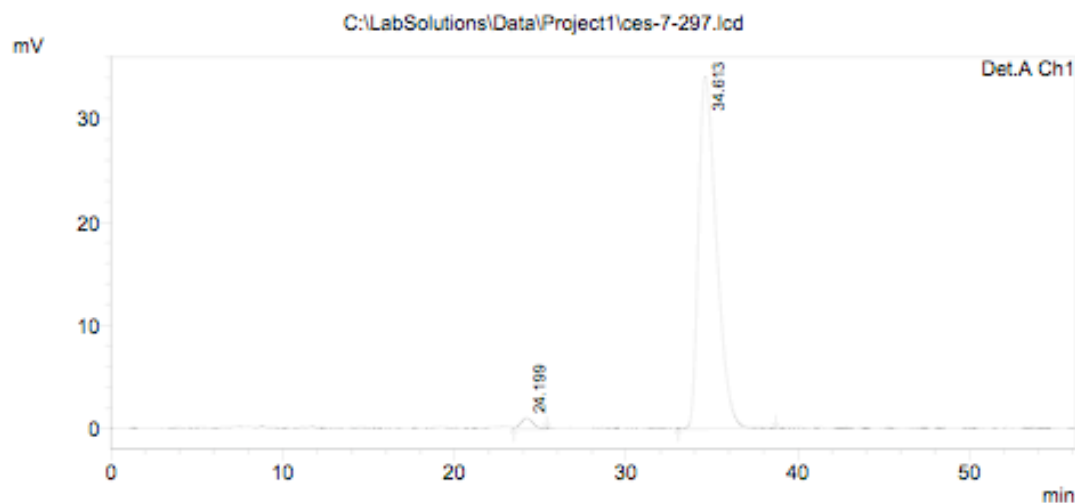

1 Det.A Ch1/215nm

PeakTable

| Peak# | Ret. Time | Area    | Height | Area %  | Height % |
|-------|-----------|---------|--------|---------|----------|
| 1     | 24.199    | 49009   | 1029   | 1.942   | 2.930    |
| 2     | 34.613    | 2474098 | 34107  | 98.058  | 97.070   |
| Total |           | 2523106 | 35137  | 100.000 | 100.000  |

C:\LabSolutions\Data\Project1\ces-7-297.lcd

5/27/2011 11:37:21 1 / 1

## ==== Shimadzu LCsolution Analysis Report ====

C:\LabSolutions\Data\Project1\ces-7-298.lcd

Acquired by : Admin  
 Sample Name : ces-7-298  
 Sample ID : ces-7-298  
 Vial # :  
 Injection Volume : 20 uL  
 Data File Name : ces-7-298.lcd  
 Method File Name : ces-OD-H-analytical.lcm  
 Batch File Name :  
 Report File Name : Default.lcr  
 Data Acquired : 3/23/2011 12:05:08 PM  
 Data Processed : 3/23/2011 12:53:54 PM

### <Chromatogram>

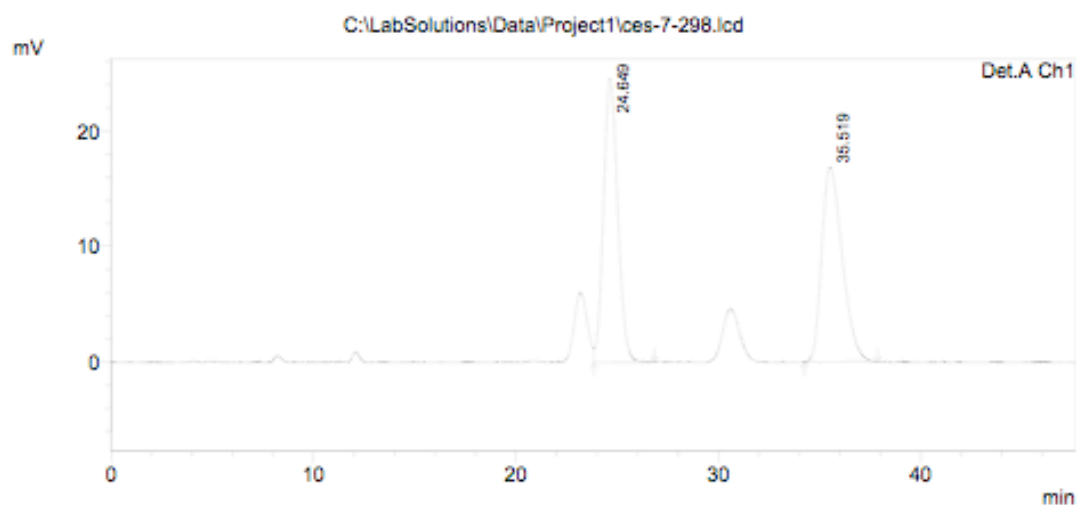

1 Det.A Ch1/215nm

PeakTable

Detector A Ch1 215nm

| Peak# | Ret. Time | Area    | Height | Area %  | Height % |
|-------|-----------|---------|--------|---------|----------|
| 1     | 24.649    | 1199222 | 24588  | 50.234  | 59.361   |
| 2     | 35.519    | 1188031 | 16833  | 49.766  | 40.639   |
| Total |           | 2387253 | 41422  | 100.000 | 100.000  |

C:\LabSolutions\Data\Project1\ces-7-298.lcd



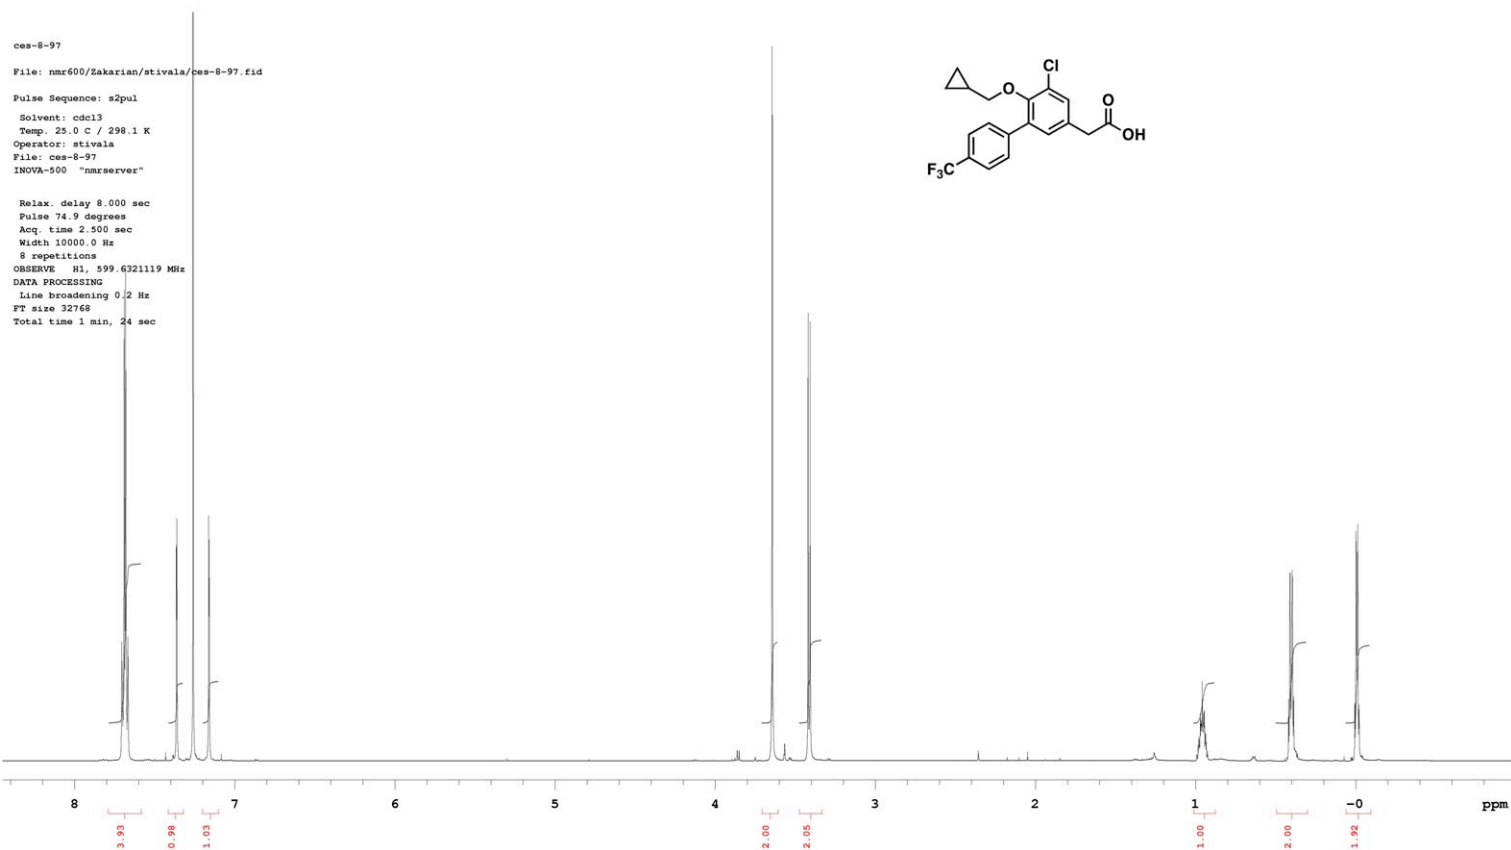

ces-8-97-cl3

Sample: 1. Indanone

File: nmr600/Zakarian/stivala/ces-8-97-cl3.fid

Pulse Sequence: s2pul

Solvent: cdcl3

Temp. 25.0 C / 298.1 K

Operator: stivala

File: ces-8-97-cl3

INOVA-500 "nmrserver"

Relax. delay 1.000 sec

Pulse 10.0 usec

Acq. time 1.298 sec

Width 36231.9 Hz

791 repetitions

OBSERVE C13, 150.775798 MHz

DECOUPLE H1, 599.6381203 MHz

Power 34 dB

continuously on

WALTZ-16 modulated

DATA PROCESSING

Line broadening 0.5 Hz

FT size 131072

Total time 6 hr, 25 min, 1 sec

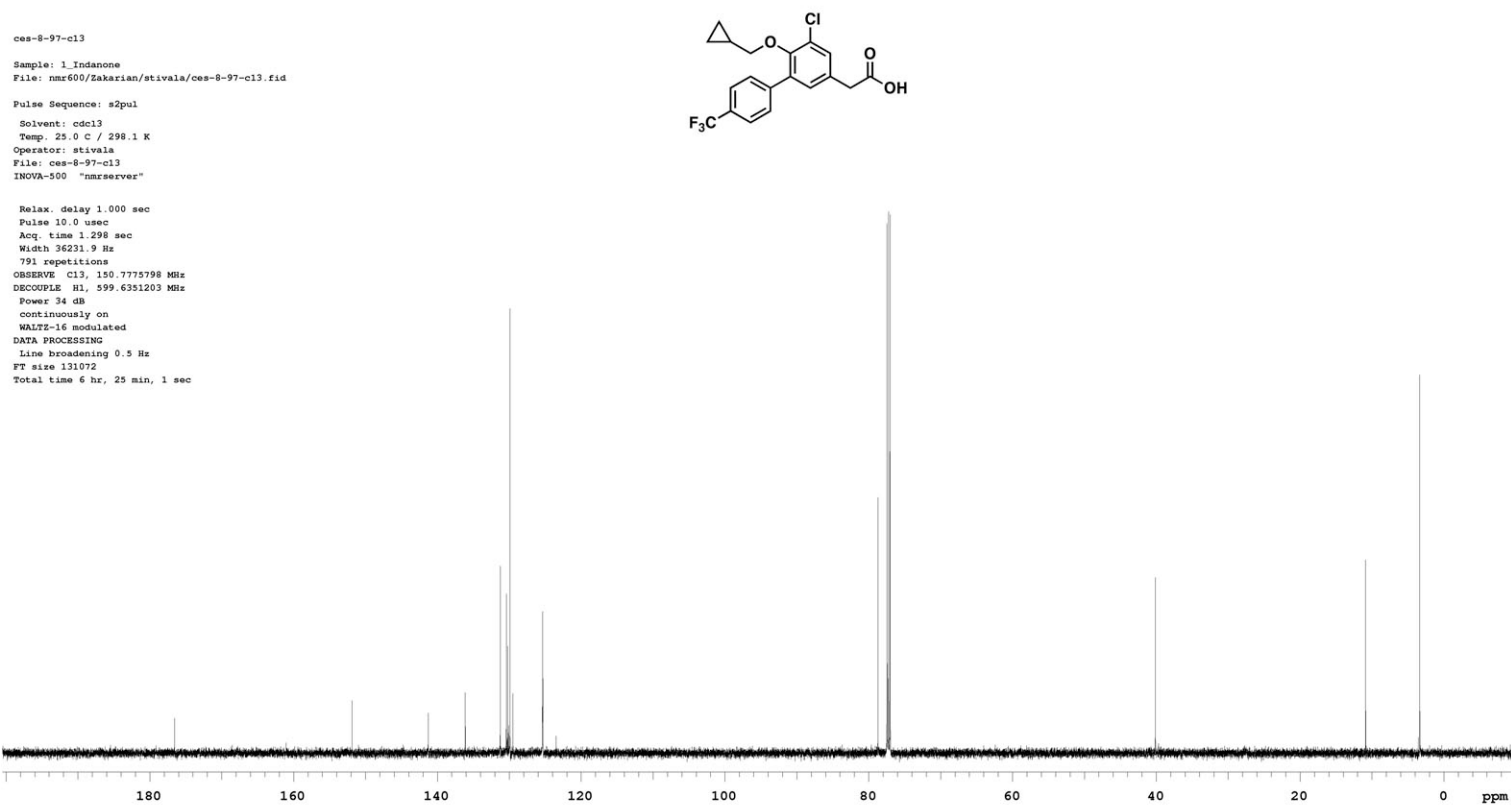

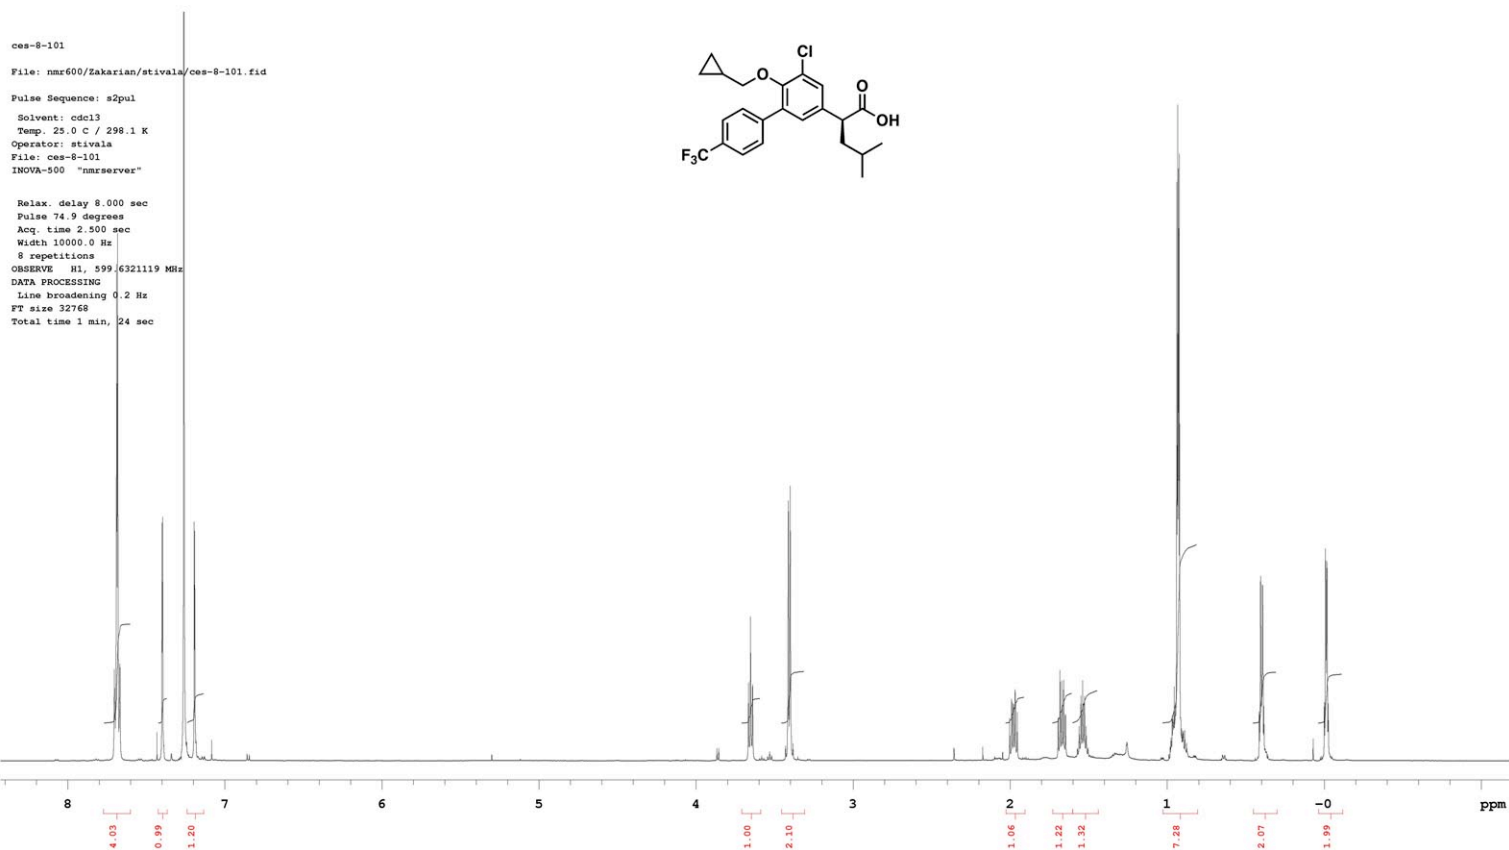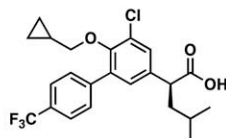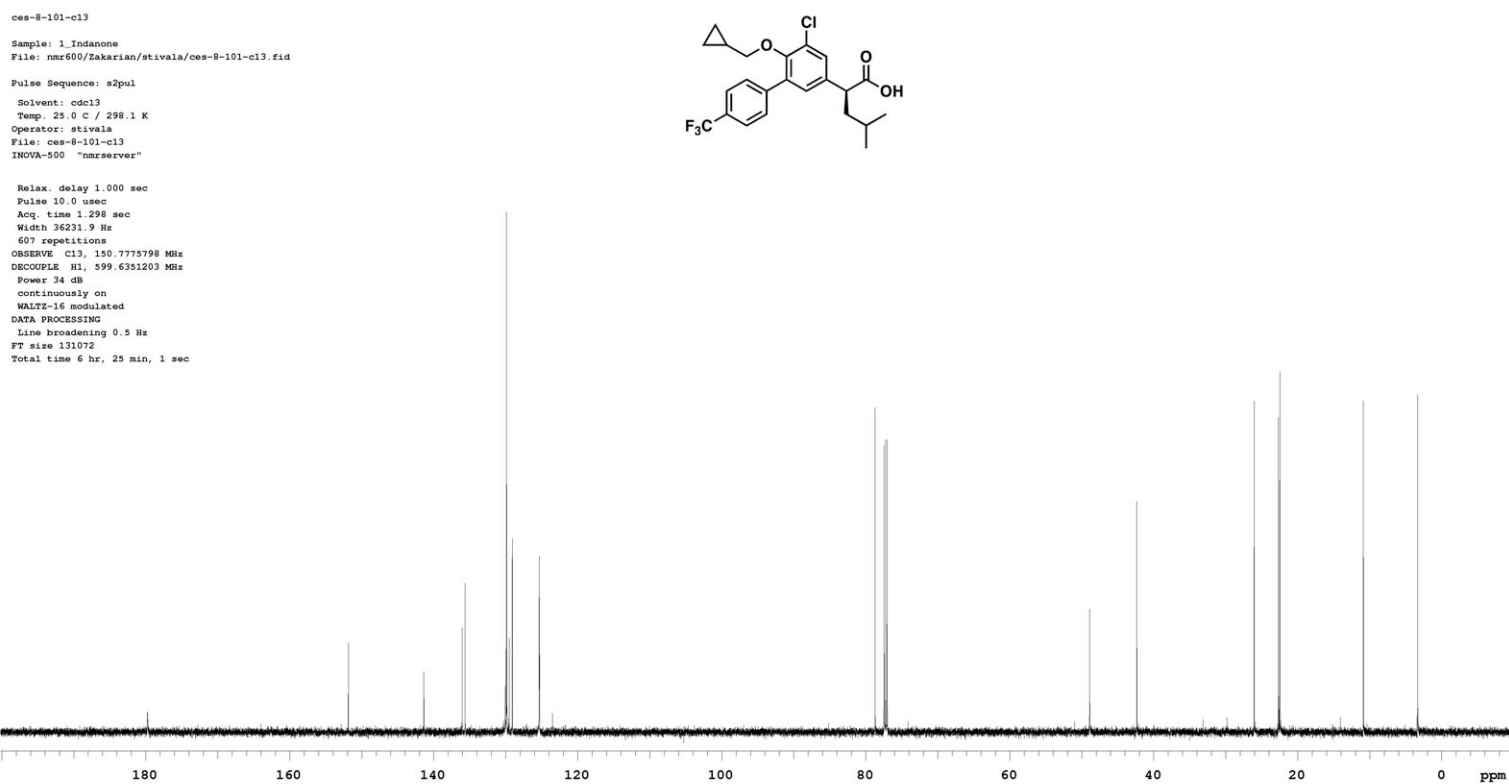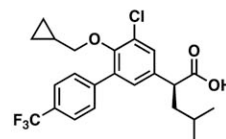

5/27/2011 10:30:11 1 / 1

## ==== Shimadzu LCsolution Analysis Report ====

C:\LabSolutions\Data\Project1\ces-8-101.lcd

Acquired by : Admin  
 Sample Name : ces-8-101  
 Sample ID : ces-8-101  
 Vial # :  
 Injection Volume : 20 uL  
 Data File Name : ces-8-101.lcd  
 Method File Name : ces-OD-H-analytical 0.46cm x 25cm.lcm  
 Batch File Name :  
 Report File Name : Default.lcr  
 Data Acquired : 5/4/2011 10:15:59 AM  
 Data Processed : 5/4/2011 4:22:11 PM

### <Chromatogram>

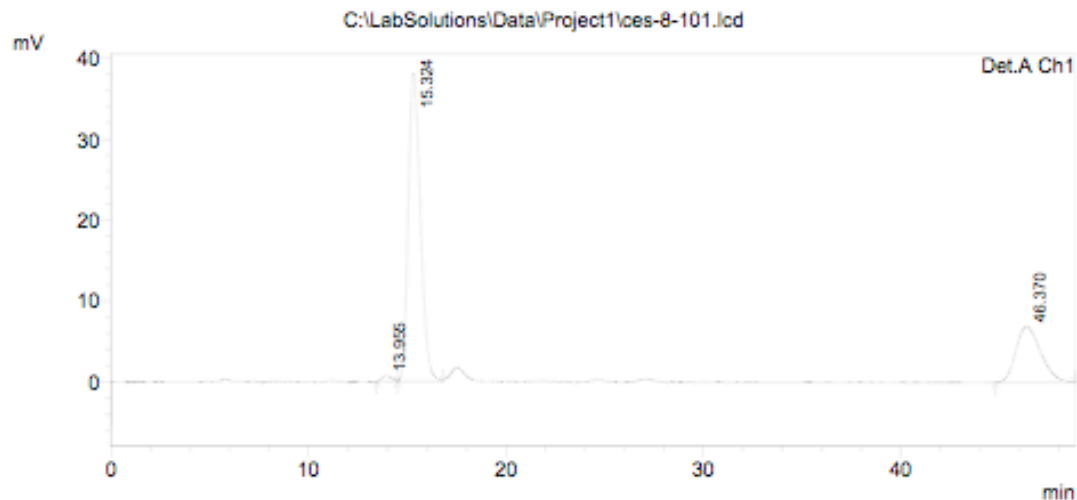

PeakTable

| Peak# | Ret. Time | Area    | Height | Area %  | Height % |
|-------|-----------|---------|--------|---------|----------|
| 1     | 13.955    | 26619   | 733    | 1.174   | 1.604    |
| 2     | 15.324    | 1635977 | 38090  | 72.145  | 83.315   |
| 3     | 46.370    | 605032  | 6895   | 26.681  | 15.082   |
| Total |           | 2267628 | 45718  | 100.000 | 100.000  |

C:\LabSolutions\Data\Project1\ces-8-101.lcd

5/27/2011 12:08:15 1 / 1

## ==== Shimadzu LCsolution Analysis Report ====

C:\LabSolutions\Data\Project1\ces-8-99-03.lcd

Acquired by : Admin  
 Sample Name : ces-8-99-2  
 Sample ID : ces-8-99-2  
 Vial # :  
 Injection Volume : 20 uL  
 Data File Name : ces-8-99-03.lcd  
 Method File Name : ces-OD-H-analytical 0.46cm x 25cm.lcm  
 Batch File Name :  
 Report File Name : Default.lcr  
 Data Acquired : 5/3/2011 2:30:16 PM  
 Data Processed : 5/3/2011 5:20:28 PM

### <Chromatogram>

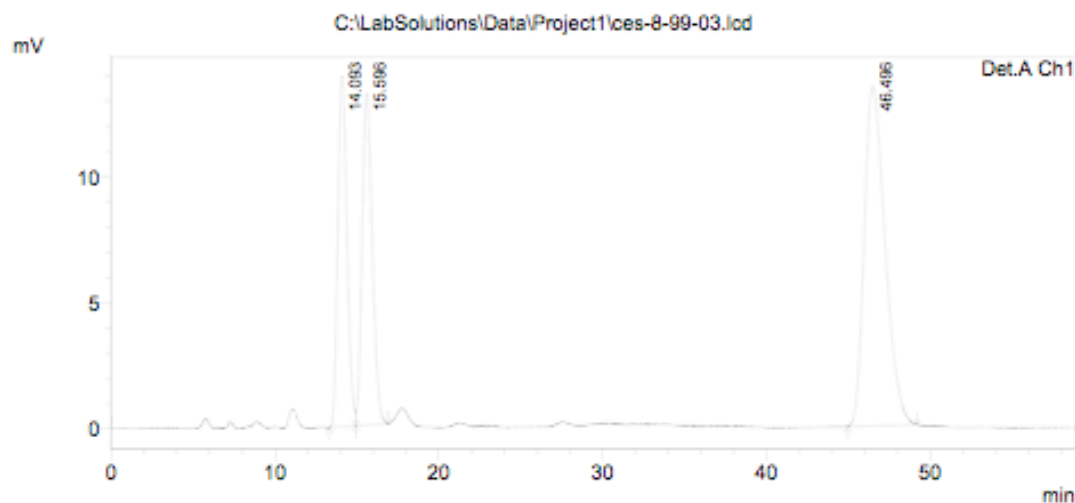

1 Det.A Ch1/215nm

PeakTable

| Peak# | Ret. Time | Area    | Height | Area %  | Height % |
|-------|-----------|---------|--------|---------|----------|
| 1     | 14.093    | 536686  | 13875  | 23.380  | 34.304   |
| 2     | 15.596    | 567405  | 13133  | 24.718  | 32.468   |
| 3     | 46.496    | 1191417 | 13440  | 51.902  | 33.228   |
| Total |           | 2295508 | 40448  | 100.000 | 100.000  |

C:\LabSolutions\Data\Project1\ces-8-99-03.lcd
